# Supplementary material for: Phaeoviruses Present in Cultured and Natural Kelp Species, Saccharina latissima and Laminaria hyperborea (Phaeophyceae, Laminariales), in Norway
Source: MDPI journal article supplement (doi:10.3390/v15122331), 2023-11-28
Supplement: s1 [file s1]

Supplementary material

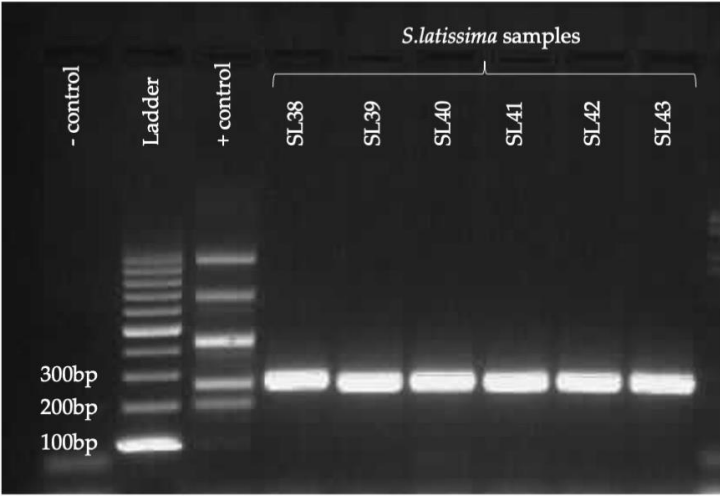

Figure S1: Example of an agarose gel electrophoresis analysis with six positive *Saccharina latissima* samples. *Nereocystis luetkeana* sample #18 was used as positive control [51].

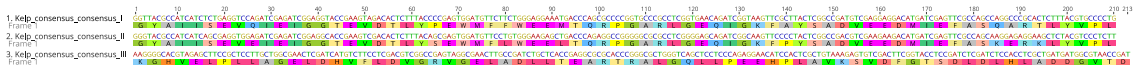

Figure S2: The three final viral consensus sequences from our entire dataset (named master variant I, II and III) and their respective protein translations.

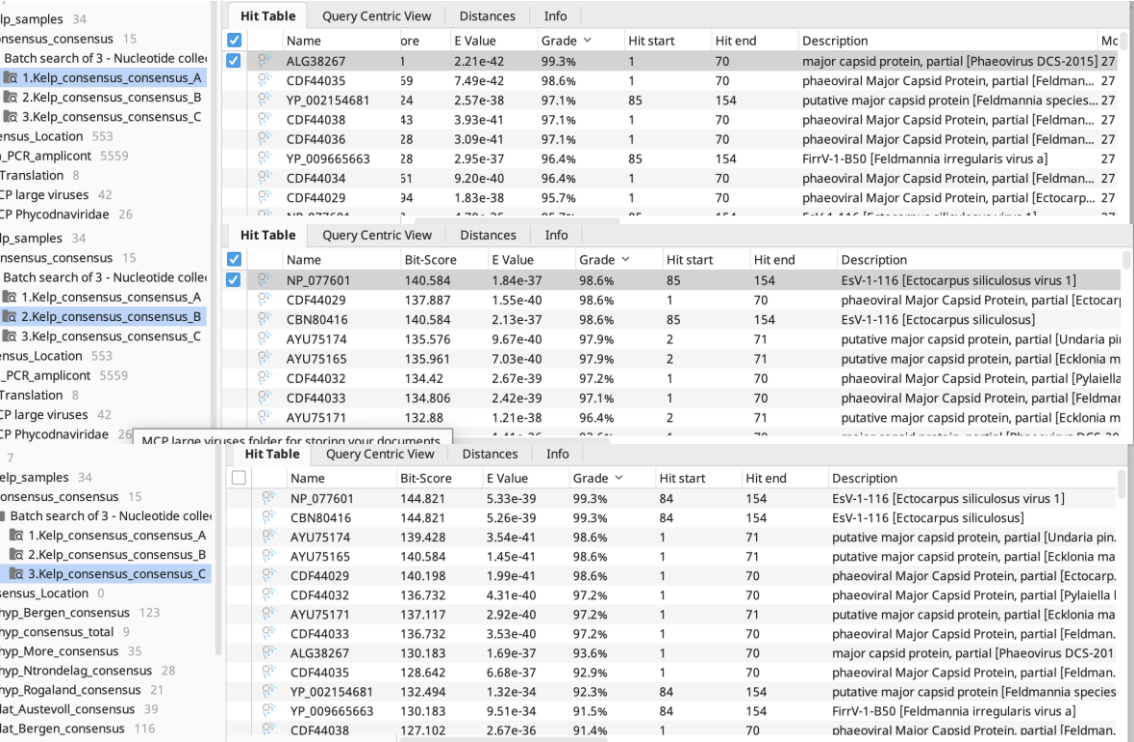

Figure S3: Gen Bank's Blastn search results for the three final viral nucleotide consensus sequences.

**Table S1: *S.latissima* samples (2021-2022).**

| Sam<br>ple | Species                 | Date           | Location            | Lat          | Long         | Sampling<br>station | Depth<br>(m) | AV Ta<br>(Celsius) | Salini<br>ty | Dry weight<br>(mg) | DNA 1<br>(ng/ul) | Volume<br>(ul) | DNA 2<br>(ng/ul) | Volume<br>(ul) | Virus<br>positive? |
|------------|-------------------------|----------------|---------------------|--------------|--------------|---------------------|--------------|--------------------|--------------|--------------------|------------------|----------------|------------------|----------------|--------------------|
| SL1        | <i>S.<br/>Latissima</i> | 04/05/2<br>021 | Trollsøy, Austevoll | 60,130<br>35 | 5,2481<br>83 | T                   | 0-5          | 9,4                | 33           | 21                 | 4,48             | 100            | -                | -              | 0                  |
| SL2        | <i>S.<br/>Latissima</i> | 04/05/2<br>021 | Trollsøy, Austevoll | 60,130<br>35 | 5,2481<br>83 | T                   | 0-5          | 9,4                | 33           | 20                 | 3,64             | 100            | -                | -              | 1                  |
| SL3        | <i>S.<br/>Latissima</i> | 04/05/2<br>021 | Trollsøy, Austevoll | 60,130<br>35 | 5,2481<br>83 | T                   | 0-5          | 9,4                | 33           | 17                 | 2,84             | 50             | 3,82             | 50             | 1                  |
| SL4        | <i>S.<br/>Latissima</i> | 04/05/2<br>021 | Trollsøy, Austevoll | 60,130<br>35 | 5,2481<br>83 | T                   | 0-5          | 9,4                | 33           | 17                 | 4,98             | 50             | 4,18             | 50             | 1                  |
| SL5        | <i>S.<br/>Latissima</i> | 04/05/2<br>021 | Trollsøy, Austevoll | 60,130<br>35 | 5,2481<br>83 | T                   | 0-5          | 9,4                | 33           | 19                 | 8,56             | 50             | 5,92             | 50             | 0                  |
| SL6        | <i>S.<br/>Latissima</i> | 04/05/2<br>021 | Trollsøy, Austevoll | 60,130<br>35 | 5,2481<br>83 | T                   | 0-5          | 9,4                | 33           | 15                 | 2,26             | 50             | 5,36             | 50             | 1                  |
| SL7        | <i>S.<br/>Latissima</i> | 04/05/2<br>021 | Trollsøy, Austevoll | 60,130<br>35 | 5,2481<br>83 | T                   | 0-5          | 9,4                | 33           | 17                 | 10,8             | 50             | 4,92             | 50             | 1                  |
| SL8        | <i>S.<br/>Latissima</i> | 04/05/2<br>021 | Trollsøy, Austevoll | 60,130<br>35 | 5,2481<br>83 | T                   | 0-5          | 9,4                | 33           | 20                 | 8,6              | 50             | 3,66             | 50             | 0                  |
| SL9        | <i>S.<br/>Latissima</i> | 04/05/2<br>021 | Trollsøy, Austevoll | 60,130<br>35 | 5,2481<br>83 | T                   | 0-5          | 9,4                | 33           | 14                 | 3,86             | 50             | 3,58             | 50             | 0                  |
| SL10       | <i>S.<br/>Latissima</i> | 04/05/2<br>021 | Trollsøy, Austevoll | 60,130<br>35 | 5,2481<br>83 | T                   | 0-5          | 9,4                | 33           | 19                 | 4,32             | 50             | 4,28             | 50             | 0                  |
| SL11       | <i>S.<br/>Latissima</i> | 04/05/2<br>021 | Trollsøy, Austevoll | 60,130<br>35 | 5,2481<br>83 | T                   | 0-5          | 9,4                | 33           | 20                 | 11,3             | 50             | 3,42             | 50             | 1                  |
| SL12       | <i>S.<br/>Latissima</i> | 04/05/2<br>021 | Trollsøy, Austevoll | 60,130<br>35 | 5,2481<br>83 | T                   | 0-5          | 9,4                | 33           | 13                 | 5                | 50             | 5,3              | 50             | 0                  |

|      |                 |                |                     |              |              |   |     |     |    |    |      |    |      |    |   |
|------|-----------------|----------------|---------------------|--------------|--------------|---|-----|-----|----|----|------|----|------|----|---|
| SL13 | S.<br>Latissima | 04/05/2<br>021 | Trollsøy, Austevoll | 60,130<br>35 | 5,2481<br>83 | T | 0-5 | 9,4 | 33 | 17 | 2,5  | 50 | 3,36 | 50 | 1 |
| SL14 | S.<br>Latissima | 04/05/2<br>021 | Trollsøy, Austevoll | 60,130<br>35 | 5,2481<br>83 | T | 0-5 | 9,4 | 33 | 24 | 9,74 | 50 | 4,7  | 50 | 1 |
| SL15 | S.<br>Latissima | 04/05/2<br>021 | Trollsøy, Austevoll | 60,130<br>35 | 5,2481<br>83 | T | 0-5 | 9,4 | 33 | 20 | 11,4 | 50 | 2,28 | 50 | 1 |
| SL16 | S.<br>Latissima | 04/05/2<br>021 | Trollsøy, Austevoll | 60,130<br>35 | 5,2481<br>83 | T | 0-5 | 9,4 | 33 | 19 | 4,94 | 50 | 1,87 | 50 | 1 |
| SL17 | S.<br>Latissima | 04/05/2<br>021 | Trollsøy, Austevoll | 60,130<br>35 | 5,2481<br>83 | T | 0-5 | 9,4 | 33 | 16 | 20,6 | 50 | 6,7  | 50 | 1 |
| SL18 | S.<br>Latissima | 04/05/2<br>021 | Trollsøy, Austevoll | 60,130<br>35 | 5,2481<br>83 | T | 0-5 | 9,4 | 33 | 19 | 5,58 | 50 | 5,54 | 50 | 1 |
| SL19 | S.<br>Latissima | 04/05/2<br>021 | Trollsøy, Austevoll | 60,130<br>35 | 5,2481<br>83 | T | 0-5 | 9,4 | 33 | 12 | 6,62 | 50 | 2,9  | 50 | 0 |
| SL20 | S.<br>Latissima | 04/05/2<br>021 | Trollsøy, Austevoll | 60,130<br>35 | 5,2481<br>83 | T | 0-5 | 9,4 | 33 | 14 | 6,56 | 50 | 3,7  | 50 | 1 |
| SL21 | S.<br>Latissima | 04/05/2<br>021 | Trollsøy, Austevoll | 60,130<br>35 | 5,2481<br>83 | T | 0-5 | 9,4 | 33 | 15 | 4,98 | 50 | 4,06 | 50 | 1 |
| SL22 | S.<br>Latissima | 04/05/2<br>021 | Trollsøy, Austevoll | 60,130<br>35 | 5,2481<br>83 | T | 0-5 | 9,4 | 33 | 18 | 6,66 | 50 | 5,16 | 50 | 1 |
| SL23 | S.<br>Latissima | 04/05/2<br>021 | Trollsøy, Austevoll | 60,130<br>35 | 5,2481<br>83 | T | 0-5 | 9,4 | 33 | 14 | 7,32 | 50 | 4,58 | 50 | 1 |
| SL24 | S.<br>Latissima | 04/05/2<br>021 | Trollsøy, Austevoll | 60,130<br>35 | 5,2481<br>83 | T | 0-5 | 9,4 | 33 | 23 | 3,66 | 50 | 1,66 | 50 | 1 |
| SL25 | S.<br>Latissima | 04/05/2<br>021 | Trollsøy, Austevoll | 60,130<br>35 | 5,2481<br>83 | T | 0-5 | 9,4 | 33 | 16 | 3,62 | 50 | 4,3  | 50 | 1 |
| SL26 | S.<br>Latissima | 04/05/2<br>021 | Trollsøy, Austevoll | 60,130<br>35 | 5,2481<br>83 | T | 0-5 | 9,4 | 33 | 25 | 13,8 | 50 | 9,82 | 50 | 1 |

|      |                 |                |                     |              |              |   |     |     |    |      |      |    |      |    |   |
|------|-----------------|----------------|---------------------|--------------|--------------|---|-----|-----|----|------|------|----|------|----|---|
| SL27 | S.<br>Latissima | 04/05/2<br>021 | Trollsøy, Austevoll | 60,130<br>35 | 5,2481<br>83 | T | 0-5 | 9,4 | 33 | 23   | 9,68 | 50 | 4,78 | 50 | 1 |
| SL28 | S.<br>Latissima | 04/05/2<br>021 | Trollsøy, Austevoll | 60,130<br>35 | 5,2481<br>83 | T | 0-5 | 9,4 | 33 | 22   | 12,3 | 50 | 7,02 | 50 | 1 |
| SL29 | S.<br>Latissima | 04/05/2<br>021 | Trollsøy, Austevoll | 60,130<br>35 | 5,2481<br>83 | T | 0-5 | 9,4 | 33 | 9    | 48,6 | 50 | 33   | 50 | 1 |
| SL30 | S.<br>Latissima | 04/05/2<br>021 | Trollsøy, Austevoll | 60,130<br>35 | 5,2481<br>83 | T | 0-5 | 9,4 | 33 | 23   | 14,3 | 50 | 7,78 | 50 | 1 |
| SL31 | S.<br>Latissima | 04/05/2<br>021 | Trollsøy, Austevoll | 60,130<br>35 | 5,2481<br>83 | T | 0-5 | 9,4 | 33 | 22   | 11,8 | 50 | 6,44 | 50 | 1 |
| SL32 | S.<br>Latissima | 04/05/2<br>021 | Trollsøy, Austevoll | 60,130<br>35 | 5,2481<br>83 | T | 0-5 | 9,4 | 33 | 21   | 45,2 | 50 | 21,6 | 50 | 1 |
| SL33 | S.<br>Latissima | 04/05/2<br>021 | Trollsøy, Austevoll | 60,130<br>35 | 5,2481<br>83 | T | 0-5 | 9,4 | 33 | 23   | 26,8 | 50 | 5,28 | 50 | 1 |
| SL34 | S.<br>Latissima | 04/05/2<br>021 | Trollsøy, Austevoll | 60,130<br>35 | 5,2481<br>83 | T | 0-5 | 9,4 | 33 | 22   | 14,2 | 50 | 8,54 | 50 | 1 |
| SL35 | S.<br>Latissima | 04/05/2<br>021 | Trollsøy, Austevoll | 60,130<br>35 | 5,2481<br>83 | T | 0-5 | 9,4 | 33 | 23   | 31,4 | 50 | 9,16 | 50 | 1 |
| SL36 | S.<br>Latissima | 04/05/2<br>021 | Trollsøy, Austevoll | 60,130<br>35 | 5,2481<br>83 | T | 0-5 | 9,4 | 33 | 22   | 8,22 | 50 | 3,66 | 50 | 1 |
| SL37 | S.<br>Latissima | 04/05/2<br>021 | Trollsøy, Austevoll | 60,130<br>35 | 5,2481<br>83 | T | 0-5 | 9,4 | 33 | 22,5 | 10,2 | 50 | 5,24 | 50 | 1 |
| SL38 | S.<br>Latissima | 04/05/2<br>021 | Trollsøy, Austevoll | 60,130<br>35 | 5,2481<br>83 | T | 0-5 | 9,4 | 33 | 17,1 | 7,38 | 50 | 5,78 | 50 | 1 |
| SL39 | S.<br>Latissima | 04/05/2<br>021 | Trollsøy, Austevoll | 60,130<br>35 | 5,2481<br>83 | T | 0-5 | 9,4 | 33 | 15,4 | 12,5 | 50 | 2,36 | 50 | 1 |
| SL40 | S.<br>Latissima | 04/05/2<br>021 | Trollsøy, Austevoll | 60,130<br>35 | 5,2481<br>83 | T | 0-5 | 9,4 | 33 | 23,9 | 9,98 | 50 | 2,58 | 50 | 1 |

|      |                 |                |                     |              |              |   |     |     |    |      |      |    |      |    |   |
|------|-----------------|----------------|---------------------|--------------|--------------|---|-----|-----|----|------|------|----|------|----|---|
| SL41 | S.<br>Latissima | 04/05/2<br>021 | Trollsøy, Austevoll | 60,130<br>35 | 5,2481<br>83 | T | 0-5 | 9,4 | 33 | 24,9 | 5,84 | 50 | 6,02 | 50 | 1 |
| SL42 | S.<br>Latissima | 04/05/2<br>021 | Trollsøy, Austevoll | 60,130<br>35 | 5,2481<br>83 | T | 0-5 | 9,4 | 33 | 20,8 | 2,06 | 50 | 2,52 | 50 | 1 |
| SL43 | S.<br>Latissima | 04/05/2<br>021 | Trollsøy, Austevoll | 60,130<br>35 | 5,2481<br>83 | T | 0-5 | 9,4 | 33 | 22,8 | 12,6 | 50 | 10,5 | 50 | 1 |
| SL44 | S.<br>Latissima | 04/05/2<br>021 | Trollsøy, Austevoll | 60,130<br>35 | 5,2481<br>83 | T | 0-5 | 9,4 | 33 | 23   | 1,85 | 50 | 6,52 | 50 | 1 |
| SL45 | S.<br>Latissima | 04/05/2<br>021 | Trollsøy, Austevoll | 60,130<br>35 | 5,2481<br>83 | T | 0-5 | 9,4 | 33 | 21   | 12,1 | 50 | 4,32 | 50 | 1 |
| SL46 | S.<br>Latissima | 04/05/2<br>021 | Trollsøy, Austevoll | 60,130<br>35 | 5,2481<br>83 | T | 0-5 | 9,4 | 33 | 21,4 | 6,94 | 50 | 1,03 | 50 | 1 |
| SL47 | S.<br>Latissima | 04/05/2<br>021 | Trollsøy, Austevoll | 60,130<br>35 | 5,2481<br>83 | T | 0-5 | 9,4 | 33 | 12,8 | 4,08 | 50 | 2,3  | 50 | 1 |
| SL48 | S.<br>Latissima | 04/05/2<br>021 | Trollsøy, Austevoll | 60,130<br>35 | 5,2481<br>83 | T | 0-5 | 9,4 | 33 | 20,7 | 4,88 | 50 | 7,14 | 50 | 1 |
| SL49 | S.<br>Latissima | 04/05/2<br>021 | Trollsøy, Austevoll | 60,130<br>35 | 5,2481<br>83 | T | 0-5 | 9,4 | 33 | 22,1 | 18   | 50 | 13,3 | 50 | 1 |
| SL50 | S.<br>Latissima | 04/05/2<br>021 | Trollsøy, Austevoll | 60,130<br>35 | 5,2481<br>83 | T | 0-5 | 9,4 | 33 | 21,4 | 4,46 | 50 | 5    | 50 | 1 |
| SL51 | S.<br>Latissima | 04/05/2<br>021 | Trollsøy, Austevoll | 60,130<br>35 | 5,2481<br>83 | T | 0-5 | 9,4 | 33 | 17,7 | 8,52 | 50 | 2,26 | 50 | 1 |
| SL52 | S.<br>Latissima | 04/05/2<br>021 | Trollsøy, Austevoll | 60,130<br>35 | 5,2481<br>83 | T | 0-5 | 9,4 | 33 | 15,6 | 5,38 | 50 | 4,84 | 50 | 1 |
| SL53 | S.<br>Latissima | 04/05/2<br>021 | Trollsøy, Austevoll | 60,130<br>35 | 5,2481<br>83 | T | 0-5 | 9,4 | 33 | 20,1 | 10,7 | 50 | 6,52 | 50 | 1 |
| SL54 | S.<br>Latissima | 04/05/2<br>021 | Trollsøy, Austevoll | 60,130<br>35 | 5,2481<br>83 | T | 0-5 | 9,4 | 33 | 17   | 12,9 | 50 | 5,12 | 50 | 1 |

|      |                 |                |                                   |               |              |     |     |     |    |      |      |    |      |    |   |
|------|-----------------|----------------|-----------------------------------|---------------|--------------|-----|-----|-----|----|------|------|----|------|----|---|
| SL55 | S.<br>Latissima | 04/05/2<br>021 | Trollsøy, Austevoll               | 60,130<br>35  | 5,2481<br>83 | T   | 0-5 | 9,4 | 33 | 17,5 | 5,28 | 50 | 3,68 | 50 | 1 |
| SL56 | S.<br>Latissima | 04/05/2<br>021 | Trollsøy, Austevoll               | 60,130<br>35  | 5,2481<br>83 | T   | 0-5 | 9,4 | 33 | 21,1 | 10,6 | 50 | 8,18 | 50 | 1 |
| SL57 | S.<br>Latissima | 04/05/2<br>021 | Trollsøy, Austevoll               | 60,130<br>35  | 5,2481<br>83 | T   | 0-5 | 9,4 | 33 | 16,8 | 1,79 | 50 | 2,42 | 50 | 1 |
| SL58 | S.<br>Latissima | 04/05/2<br>021 | Trollsøy, Austevoll               | 60,130<br>35  | 5,2481<br>83 | T   | 0-5 | 9,4 | 33 | 11,5 | 5,06 | 50 | 3,46 | 50 | 1 |
| SL59 | S.<br>Latissima | 04/05/2<br>021 | Trollsøy, Austevoll               | 60,130<br>35  | 5,2481<br>83 | T   | 0-5 | 9,4 | 33 | 19,4 | 2,2  | 50 | 2,86 | 50 | 1 |
| SL60 | S.<br>Latissima | 04/05/2<br>021 | Trollsøy, Austevoll               | 60,130<br>35  | 5,2481<br>83 | T   | 0-5 | 9,4 | 33 | 19,3 | 7,04 | 50 | 4,1  | 50 | 1 |
| SL61 | S.<br>Latissima | 04/05/2<br>021 | Trollsøy, Austevoll               | 60,130<br>35  | 5,2481<br>83 | T   | 0-5 | 9,4 | 33 | 19,1 | 4,42 | 50 | 4,2  | 50 | 1 |
| SL62 | S.<br>Latissima | 23/01/2<br>022 | Korsfjorden, Bergen,<br>Hordaland | 60.240<br>977 | 5.2403<br>32 | K-2 | 0-5 | 6,6 | 32 | 17,5 | 2,2  | 50 | 1,22 | 50 | 1 |
| SL63 | S.<br>Latissima | 23/01/2<br>022 | Korsfjorden, Bergen,<br>Hordaland | 60.240<br>977 | 5.2403<br>32 | K-2 | 0-5 | 6,6 | 32 | 23,6 | 15   | 50 | 2,4  | 50 | 1 |
| SL64 | S.<br>Latissima | 23/01/2<br>022 | Korsfjorden, Bergen,<br>Hordaland | 60.240<br>977 | 5.2403<br>32 | K-2 | 0-5 | 6,6 | 32 | 13   | 4,78 | 50 | 5,22 | 50 | 1 |
| SL65 | S.<br>Latissima | 23/01/2<br>022 | Korsfjorden, Bergen,<br>Hordaland | 60.240<br>977 | 5.2403<br>32 | K-2 | 0-5 | 6,6 | 32 | 17   | 17,9 | 50 | 4,2  | 50 | 1 |
| SL66 | S.<br>Latissima | 23/01/2<br>022 | Korsfjorden, Bergen,<br>Hordaland | 60.240<br>977 | 5.2403<br>32 | K-2 | 0-5 | 6,6 | 32 | 25,6 | 30   | 50 | 38,4 | 50 | 1 |
| SL67 | S.<br>Latissima | 23/01/2<br>022 | Korsfjorden, Bergen,<br>Hordaland | 60.240<br>977 | 5.2403<br>32 | K-2 | 0-5 | 6,6 | 32 | 27,3 | 19,3 | 50 | 12,1 | 50 | 0 |
| SL68 | S.<br>Latissima | 23/01/2<br>022 | Korsfjorden, Bergen,<br>Hordaland | 60.240<br>977 | 5.2403<br>32 | K-2 | 0-5 | 6,6 | 32 | 23,3 | 17,4 | 50 | 9,34 | 50 | 1 |

|      |                 |                |                                   |               |              |     |     |     |    |      |      |     |      |    |   |
|------|-----------------|----------------|-----------------------------------|---------------|--------------|-----|-----|-----|----|------|------|-----|------|----|---|
| SL69 | S.<br>Latissima | 23/01/2<br>022 | Korsfjorden, Bergen,<br>Hordaland | 60.240<br>977 | 5.2403<br>32 | K-2 | 0-5 | 6,6 | 32 | 21   | 23,6 | 50  | 29,2 | 50 | 1 |
| SL70 | S.<br>Latissima | 23/01/2<br>022 | Korsfjorden, Bergen,<br>Hordaland | 60.240<br>977 | 5.2403<br>32 | K-2 | 0-5 | 6,6 | 32 | 20,3 | 10,9 | 50  | 4,88 | 50 | 1 |
| SL71 | S.<br>Latissima | 23/01/2<br>022 | Korsfjorden, Bergen,<br>Hordaland | 60.240<br>977 | 5.2403<br>32 | K-2 | 0-5 | 6,6 | 32 | 19   | 11,2 | 50  | 4,24 | 50 | 1 |
| SL72 | S.<br>Latissima | 23/01/2<br>022 | Korsfjorden, Bergen,<br>Hordaland | 60.240<br>977 | 5.2403<br>32 | K-2 | 0-5 | 6,6 | 32 | 23,8 | 10,9 | 100 |      |    | 1 |
| SL73 | S.<br>Latissima | 23/01/2<br>022 | Korsfjorden, Bergen,<br>Hordaland | 60.240<br>977 | 5.2403<br>32 | K-2 | 0-5 | 6,6 | 32 | 17   | 7,6  | 100 |      |    | 1 |
| SL74 | S.<br>Latissima | 23/01/2<br>022 | Korsfjorden, Bergen,<br>Hordaland | 60.240<br>977 | 5.2403<br>32 | K-2 | 0-5 | 6,6 | 32 | 21   | 20,2 | 100 |      |    | 1 |
| SL75 | S.<br>Latissima | 23/01/2<br>022 | Korsfjorden, Bergen,<br>Hordaland | 60.240<br>977 | 5.2403<br>32 | K-2 | 0-5 | 6,6 | 32 | 16,6 | 11   | 100 |      |    | 1 |
| SL76 | S.<br>Latissima | 23/01/2<br>022 | Korsfjorden, Bergen,<br>Hordaland | 60.240<br>977 | 5.2403<br>32 | K-2 | 0-5 | 6,6 | 32 | 23,8 | 24,6 | 100 |      |    | 1 |
| SL77 | S.<br>Latissima | 23/01/2<br>022 | Korsfjorden, Bergen,<br>Hordaland | 60.240<br>977 | 5.2403<br>32 | K-2 | 0-5 | 6,6 | 32 | 17   | 7,5  | 100 |      |    | 1 |
| SL78 | S.<br>Latissima | 23/01/2<br>022 | Korsfjorden, Bergen,<br>Hordaland | 60.240<br>977 | 5.2403<br>32 | K-2 | 0-5 | 6,6 | 32 | 22   | 37,2 | 100 |      |    | 1 |
| SL79 | S.<br>Latissima | 23/01/2<br>022 | Korsfjorden, Bergen,<br>Hordaland | 60.240<br>977 | 5.2403<br>32 | K-2 | 0-5 | 6,6 | 32 | 19   | 11,9 | 100 |      |    | 1 |
| SL80 | S.<br>Latissima | 23/01/2<br>022 | Korsfjorden, Bergen,<br>Hordaland | 60.240<br>977 | 5.2403<br>32 | K-2 | 0-5 | 6,6 | 32 | 12   | 9,24 | 100 |      |    | 1 |
| SL81 | S.<br>Latissima | 23/01/2<br>022 | Korsfjorden, Bergen,<br>Hordaland | 60.240<br>977 | 5.2403<br>32 | K-2 | 0-5 | 6,6 | 32 | 21,7 | 26,6 | 100 |      |    | 1 |
| SL82 | S.<br>Latissima | 23/01/2<br>022 | Korsfjorden, Bergen,<br>Hordaland | 60.240<br>977 | 5.2403<br>32 | K-2 | 0-5 | 6,6 | 32 | 24,8 | 16   | 50  | 6,22 | 50 | 1 |

|      |                 |                |                                   |               |              |     |     |     |    |      |      |    |      |    |   |
|------|-----------------|----------------|-----------------------------------|---------------|--------------|-----|-----|-----|----|------|------|----|------|----|---|
| SL83 | S.<br>Latissima | 23/01/2<br>022 | Korsfjorden, Bergen,<br>Hordaland | 60.240<br>977 | 5.2403<br>32 | K-2 | 0-5 | 6,6 | 32 | 15   | 5,16 | 50 | 1,95 | 50 | 1 |
| SL84 | S.<br>Latissima | 23/01/2<br>022 | Korsfjorden, Bergen,<br>Hordaland | 60.240<br>977 | 5.2403<br>32 | K-2 | 0-5 | 6,6 | 32 | 21,9 | 8    | 50 | 2,06 | 50 | 1 |
| SL85 | S.<br>Latissima | 23/01/2<br>022 | Korsfjorden, Bergen,<br>Hordaland | 60.240<br>977 | 5.2403<br>32 | K-2 | 0-5 | 6,6 | 32 | 24,5 | 3,16 | 50 | 3,18 | 50 | 1 |
| SL86 | S.<br>Latissima | 23/01/2<br>022 | Korsfjorden, Bergen,<br>Hordaland | 60.240<br>977 | 5.2403<br>32 | K-2 | 0-5 | 6,6 | 32 | 22,4 | 9,82 | 50 | 9,26 | 50 | 1 |
| SL87 | S.<br>Latissima | 23/01/2<br>022 | Korsfjorden, Bergen,<br>Hordaland | 60.240<br>977 | 5.2403<br>32 | K-2 | 0-5 | 6,6 | 32 | 18   | 6,18 | 50 | 1,15 | 50 | 1 |
| SL88 | S.<br>Latissima | 23/01/2<br>022 | Korsfjorden, Bergen,<br>Hordaland | 60.240<br>977 | 5.2403<br>32 | K-2 | 0-5 | 6,6 | 32 | 18,4 | 6,3  | 50 | 3,8  | 50 | 1 |
| SL89 | S.<br>Latissima | 23/01/2<br>022 | Korsfjorden, Bergen,<br>Hordaland | 60.240<br>977 | 5.2403<br>32 | K-2 | 0-5 | 6,6 | 32 | 19,4 | 5,64 | 50 | 1,54 | 50 | 1 |
| SL90 | S.<br>Latissima | 23/01/2<br>022 | Korsfjorden, Bergen,<br>Hordaland | 60.240<br>977 | 5.2403<br>32 | K-2 | 0-5 | 6,6 | 32 | 15   | 6,1  | 50 | 1,04 | 50 | 1 |
| SL91 | S.<br>Latissima | 23/01/2<br>022 | Korsfjorden, Bergen,<br>Hordaland | 60.240<br>977 | 5.2403<br>32 | K-2 | 0-5 | 6,6 | 32 | 30   | 23   | 50 | 12,8 | 50 | 1 |
| SL92 | S.<br>Latissima | 23/01/2<br>022 | Korsfjorden, Bergen,<br>Hordaland | 60.240<br>977 | 5.2403<br>32 | K-2 | 0-5 | 6,6 | 32 | 25   | 20   | 50 | 13,5 | 50 | 0 |
| SL93 | S.<br>Latissima | 23/01/2<br>022 | Korsfjorden, Bergen,<br>Hordaland | 60.240<br>977 | 5.2403<br>32 | K-2 | 0-5 | 6,6 | 32 | 19,4 | 15,3 | 50 | 3    | 50 | 1 |
| SL94 | S.<br>Latissima | 23/01/2<br>022 | Korsfjorden, Bergen,<br>Hordaland | 60.240<br>977 | 5.2403<br>32 | K-2 | 0-5 | 6,6 | 32 | 29   | 15,3 | 50 | 4,9  | 50 | 1 |
| SL95 | S.<br>Latissima | 23/01/2<br>022 | Korsfjorden, Bergen,<br>Hordaland | 60.240<br>977 | 5.2403<br>32 | K-2 | 0-5 | 6,6 | 32 | 28   | 10,3 | 50 | 7,02 | 50 | 1 |
| SL96 | S.<br>Latissima | 23/01/2<br>022 | Korsfjorden, Bergen,<br>Hordaland | 60.240<br>977 | 5.2403<br>32 | K-2 | 0-5 | 6,6 | 32 | 23   | 21,8 | 50 | 9,66 | 50 | 1 |

|           |                 |                |                                   |               |              |     |     |     |    |      |      |    |      |    |   |
|-----------|-----------------|----------------|-----------------------------------|---------------|--------------|-----|-----|-----|----|------|------|----|------|----|---|
| SL97      | S.<br>Latissima | 08/03/2<br>022 | Korsfjorden, Bergen,<br>Hordaland | 60.240<br>977 | 5.2403<br>32 | K-2 | 0-5 | 6,0 | 32 | 25,3 | 51,2 | 50 | 11,3 | 50 | 1 |
| SL98      | S.<br>Latissima | 08/03/2<br>022 | Korsfjorden, Bergen,<br>Hordaland | 60.240<br>977 | 5.2403<br>32 | K-2 | 0-5 | 6,0 | 32 | 25,7 | 19   | 50 | 8,84 | 50 | 1 |
| SL99      | S.<br>Latissima | 08/03/2<br>022 | Korsfjorden, Bergen,<br>Hordaland | 60.240<br>977 | 5.2403<br>32 | K-2 | 0-5 | 6,0 | 32 | 17,2 | 5,14 | 50 | 1,8  | 50 | 1 |
| SL10<br>0 | S.<br>Latissima | 08/03/2<br>022 | Korsfjorden, Bergen,<br>Hordaland | 60.240<br>977 | 5.2403<br>32 | K-2 | 0-5 | 6,0 | 32 | 22,9 | 35   | 50 | 22,4 | 50 | 1 |
| SL10<br>1 | S.<br>Latissima | 08/03/2<br>022 | Korsfjorden, Bergen,<br>Hordaland | 60.240<br>977 | 5.2403<br>32 | K-2 | 0-5 | 6,0 | 32 | 22,4 | 21,2 | 50 | 10,6 | 50 | 1 |
| SL10<br>2 | S.<br>Latissima | 08/03/2<br>022 | Korsfjorden, Bergen,<br>Hordaland | 60.240<br>977 | 5.2403<br>32 | K-2 | 0-5 | 6,0 | 32 | 18,2 | 8,44 | 50 | 7,06 | 50 | 1 |
| SL10<br>3 | S.<br>Latissima | 08/03/2<br>022 | Korsfjorden, Bergen,<br>Hordaland | 60.240<br>977 | 5.2403<br>32 | K-2 | 0-5 | 6,0 | 32 | 21,2 | 8,8  | 50 | 5,76 | 50 | 1 |
| SL10<br>4 | S.<br>Latissima | 08/03/2<br>022 | Korsfjorden, Bergen,<br>Hordaland | 60.240<br>977 | 5.2403<br>32 | K-2 | 0-5 | 6,0 | 32 | 34,4 | 29,4 | 50 | 8,96 | 50 | 1 |
| SL10<br>5 | S.<br>Latissima | 08/03/2<br>022 | Korsfjorden, Bergen,<br>Hordaland | 60.240<br>977 | 5.2403<br>32 | K-2 | 0-5 | 6,0 | 32 | 27   | 21,8 | 50 | 19,7 | 50 | 1 |
| SL10<br>6 | S.<br>Latissima | 08/03/2<br>022 | Korsfjorden, Bergen,<br>Hordaland | 60.240<br>977 | 5.2403<br>32 | K-2 | 0-5 | 6,0 | 32 | 21,3 | 12,9 | 50 | 5,44 | 50 | 1 |
| SL10<br>7 | S.<br>Latissima | 08/03/2<br>022 | Korsfjorden, Bergen,<br>Hordaland | 60.240<br>977 | 5.2403<br>32 | K-2 | 0-5 | 6,0 | 32 | 29,3 | 10,6 | 50 | 9,12 | 50 | 1 |
| SL10<br>8 | S.<br>Latissima | 08/03/2<br>022 | Korsfjorden, Bergen,<br>Hordaland | 60.240<br>977 | 5.2403<br>32 | K-2 | 0-5 | 6,0 | 32 | 24,3 | 23,6 | 50 | 13   | 50 | 1 |
| SL10<br>9 | S.<br>Latissima | 08/03/2<br>022 | Korsfjorden, Bergen,<br>Hordaland | 60.240<br>977 | 5.2403<br>32 | K-2 | 0-5 | 6,0 | 32 | 19   | 9,76 | 50 | 3,06 | 50 | 1 |
| SL11<br>0 | S.<br>Latissima | 08/03/2<br>022 | Korsfjorden, Bergen,<br>Hordaland | 60.240<br>977 | 5.2403<br>32 | K-2 | 0-5 | 6,0 | 32 | 28   | 17,6 | 50 | 5,8  | 50 | 1 |

|           |                 |                |                                   |               |              |     |     |     |    |      |      |    |      |    |   |
|-----------|-----------------|----------------|-----------------------------------|---------------|--------------|-----|-----|-----|----|------|------|----|------|----|---|
| SL11<br>1 | S.<br>Latissima | 08/03/2<br>022 | Korsfjorden, Bergen,<br>Hordaland | 60.240<br>977 | 5.2403<br>32 | K-2 | 0-5 | 6,0 | 32 | 36   | 32   | 50 | 19,3 | 50 | 1 |
| SL11<br>2 | S.<br>Latissima | 08/03/2<br>022 | Korsfjorden, Bergen,<br>Hordaland | 60.240<br>977 | 5.2403<br>32 | K-2 | 0-5 | 6,0 | 32 | 33,8 | 28   | 50 | 25,8 | 50 | 1 |
| SL11<br>3 | S.<br>Latissima | 08/03/2<br>022 | Korsfjorden, Bergen,<br>Hordaland | 60.240<br>977 | 5.2403<br>32 | K-2 | 0-5 | 6,0 | 32 | 22   | 6,74 | 50 | 4,38 | 50 | 1 |
| SL11<br>4 | S.<br>Latissima | 08/03/2<br>022 | Korsfjorden, Bergen,<br>Hordaland | 60.240<br>977 | 5.2403<br>32 | K-2 | 0-5 | 6,0 | 32 | 21,2 | 13,6 | 50 | 7,24 | 50 | 1 |
| SL11<br>5 | S.<br>Latissima | 08/03/2<br>022 | Korsfjorden, Bergen,<br>Hordaland | 60.240<br>977 | 5.2403<br>32 | K-2 | 0-5 | 6,0 | 32 | 28   | 11,8 | 50 | 4,56 | 50 | 1 |
| SL11<br>6 | S.<br>Latissima | 08/03/2<br>022 | Korsfjorden, Bergen,<br>Hordaland | 60.240<br>977 | 5.2403<br>32 | K-2 | 0-5 | 6,0 | 32 | 27   | 24   | 50 | 10,9 | 50 | 1 |
| SL11<br>7 | S.<br>Latissima | 08/03/2<br>022 | Korsfjorden, Bergen,<br>Hordaland | 60.240<br>977 | 5.2403<br>32 | K-2 | 0-5 | 6,0 | 32 | 22,4 | 4,24 | 50 | 2,9  | 50 | 1 |
| SL11<br>8 | S.<br>Latissima | 08/03/2<br>022 | Korsfjorden, Bergen,<br>Hordaland | 60.240<br>977 | 5.2403<br>32 | K-2 | 0-5 | 6,0 | 32 | 42,9 | 30,4 | 50 | 13,6 | 50 | 1 |
| SL11<br>9 | S.<br>Latissima | 08/03/2<br>022 | Korsfjorden, Bergen,<br>Hordaland | 60.240<br>977 | 5.2403<br>32 | K-2 | 0-5 | 6,0 | 32 | 26   | 16,2 | 50 | 16,3 | 50 | 0 |
| SL12<br>0 | S.<br>Latissima | 08/03/2<br>022 | Korsfjorden, Bergen,<br>Hordaland | 60.240<br>977 | 5.2403<br>32 | K-2 | 0-5 | 6,0 | 32 | 25,8 | 21,2 | 50 | 11,4 | 50 | 0 |
| SL12<br>1 | S.<br>Latissima | 08/03/2<br>022 | Korsfjorden, Bergen,<br>Hordaland | 60.240<br>977 | 5.2403<br>32 | K-2 | 0-5 | 6,0 | 32 | 27,6 | 19,1 | 50 | 18,8 | 50 | 1 |
| SL12<br>2 | S.<br>Latissima | 08/03/2<br>022 | Korsfjorden, Bergen,<br>Hordaland | 60.240<br>977 | 5.2403<br>32 | K-2 | 0-5 | 6,0 | 32 | 39,5 | 7,04 | 50 | 2,32 | 50 | 1 |
| SL12<br>3 | S.<br>Latissima | 08/03/2<br>022 | Korsfjorden, Bergen,<br>Hordaland | 60.240<br>977 | 5.2403<br>32 | K-2 | 0-5 | 6,0 | 32 | 21   | 6,5  | 50 | 3,5  | 50 | 1 |
| SL12<br>4 | S.<br>Latissima | 08/03/2<br>022 | Korsfjorden, Bergen,<br>Hordaland | 60.240<br>977 | 5.2403<br>32 | K-2 | 0-5 | 6,0 | 32 | 24,6 | 14,6 | 50 | 7,04 | 50 | 1 |

|           |                 |                |                                   |               |              |     |     |     |    |      |       |    |      |    |   |
|-----------|-----------------|----------------|-----------------------------------|---------------|--------------|-----|-----|-----|----|------|-------|----|------|----|---|
| SL12<br>5 | S.<br>Latissima | 08/03/2<br>022 | Korsfjorden, Bergen,<br>Hordaland | 60.240<br>977 | 5.2403<br>32 | K-2 | 0-5 | 6,0 | 32 | 29,7 | 18,9  | 50 | 7,94 | 50 | 1 |
| SL12<br>6 | S.<br>Latissima | 08/03/2<br>022 | Korsfjorden, Bergen,<br>Hordaland | 60.240<br>977 | 5.2403<br>32 | K-2 | 0-5 | 6,0 | 32 | 22   | 8,18  | 50 | 9,66 | 50 | 1 |
| SL12<br>7 | S.<br>Latissima | 08/03/2<br>022 | Korsfjorden, Bergen,<br>Hordaland | 60.240<br>977 | 5.2403<br>32 | K-2 | 0-5 | 6,0 | 32 | 41,2 | 19,9  | 50 | 4,34 | 50 | 1 |
| SL12<br>8 | S.<br>Latissima | 08/03/2<br>022 | Korsfjorden, Bergen,<br>Hordaland | 60.240<br>977 | 5.2403<br>32 | K-2 | 0-5 | 6,0 | 32 | 28   | 27,4  | 50 | 5,7  | 50 | 1 |
| SL12<br>9 | S.<br>Latissima | 08/03/2<br>022 | Korsfjorden, Bergen,<br>Hordaland | 60.240<br>977 | 5.2403<br>32 | K-2 | 0-5 | 6,0 | 32 | 24,4 | 19,9  | 50 | 3,2  | 50 |   |
| SL13<br>0 | S.<br>Latissima | 11/02/2<br>022 | Kvalsvik, Haugesund,<br>Rogaland  | 59.437<br>829 | 5.2318<br>08 | KV  | 0-5 | 7,1 | 34 | 17,5 | 15,15 | 50 | 8,88 | 50 | 1 |
| SL13<br>1 | S.<br>Latissima | 11/02/2<br>022 | Kvalsvik, Haugesund,<br>Rogaland  | 59.437<br>829 | 5.2318<br>08 | KV  | 0-5 | 7,1 | 34 | 17,9 | 14,3  | 50 | 14,8 | 50 | 1 |
| SL13<br>2 | S.<br>Latissima | 11/02/2<br>022 | Kvalsvik, Haugesund,<br>Rogaland  | 59.437<br>829 | 5.2318<br>08 | KV  | 0-5 | 7,1 | 34 | 24,1 | 23    | 50 | 46,6 | 50 | 1 |
| SL13<br>3 | S.<br>Latissima | 11/02/2<br>022 | Kvalsvik, Haugesund,<br>Rogaland  | 59.437<br>829 | 5.2318<br>08 | KV  | 0-5 | 7,1 | 34 | 30,9 | 29,6  | 50 | 37,6 | 50 | 1 |
| SL13<br>4 | S.<br>Latissima | 11/02/2<br>022 | Kvalsvik, Haugesund,<br>Rogaland  | 59.437<br>829 | 5.2318<br>08 | KV  | 0-5 | 7,1 | 34 | 28,2 | 31,6  | 50 | 19,5 | 50 | 1 |
| SL13<br>5 | S.<br>Latissima | 11/02/2<br>022 | Kvalsvik, Haugesund,<br>Rogaland  | 59.437<br>829 | 5.2318<br>08 | KV  | 0-5 | 7,1 | 34 | 29,5 | 83,6  | 50 | 22,2 | 50 | 1 |
| SL13<br>6 | S.<br>Latissima | 11/02/2<br>022 | Kvalsvik, Haugesund,<br>Rogaland  | 59.437<br>829 | 5.2318<br>08 | KV  | 0-5 | 7,1 | 34 | 27,8 | 29,2  | 50 | 29,2 | 50 | 1 |
| SL13<br>7 | S.<br>Latissima | 11/02/2<br>022 | Kvalsvik, Haugesund,<br>Rogaland  | 59.437<br>829 | 5.2318<br>08 | KV  | 0-5 | 7,1 | 34 | 27,4 | 29,4  | 50 | 12   | 50 | 1 |
| SL13<br>8 | S.<br>Latissima | 11/02/2<br>022 | Kvalsvik, Haugesund,<br>Rogaland  | 59.437<br>829 | 5.2318<br>08 | KV  | 0-5 | 7,1 | 34 | 17,3 | 6,44  | 50 | 2,92 | 50 | 1 |

|           |                     |                |                                  |               |              |    |     |     |    |      |      |    |      |    |   |
|-----------|---------------------|----------------|----------------------------------|---------------|--------------|----|-----|-----|----|------|------|----|------|----|---|
| SL13<br>9 | S.<br>Latissim<br>a | 11/02/2<br>022 | Kvalsvik, Haugesund,<br>Rogaland | 59.437<br>829 | 5.2318<br>08 | KV | 0-5 | 7,1 | 34 | 24,7 | 102  | 50 | 7,7  | 50 | 1 |
| SL14<br>0 | S.<br>Latissim<br>a | 11/02/2<br>022 | Kvalsvik, Haugesund,<br>Rogaland | 59.437<br>829 | 5.2318<br>08 | KV | 0-5 | 7,1 | 34 | 25,9 | 28   | 50 | 29,6 | 50 | 1 |
| SL14<br>1 | S.<br>Latissim<br>a | 11/02/2<br>022 | Kvalsvik, Haugesund,<br>Rogaland | 59.437<br>829 | 5.2318<br>08 | KV | 0-5 | 7,1 | 34 | 32,3 | 26,6 | 50 | 1603 | 50 | 1 |
| SL14<br>2 | S.<br>Latissim<br>a | 11/02/2<br>022 | Kvalsvik, Haugesund,<br>Rogaland | 59.437<br>829 | 5.2318<br>08 | KV | 0-5 | 7,1 | 34 | 21,2 | 17,9 | 50 | 11,8 | 50 | 1 |
| SL14<br>3 | S.<br>Latissim<br>a | 11/02/2<br>022 | Kvalsvik, Haugesund,<br>Rogaland | 59.437<br>829 | 5.2318<br>08 | KV | 0-5 | 7,1 | 34 | 24,6 | 37   | 50 | 8,62 | 50 | 1 |
| SL14<br>4 | S.<br>Latissim<br>a | 11/02/2<br>022 | Kvalsvik, Haugesund,<br>Rogaland | 59.437<br>829 | 5.2318<br>08 | KV | 0-5 | 7,1 | 34 | 26,7 | 28,2 | 50 | 10,7 | 50 | 1 |
| SL14<br>5 | S.<br>Latissim<br>a | 11/02/2<br>022 | Kvalsvik, Haugesund,<br>Rogaland | 59.437<br>829 | 5.2318<br>08 | KV | 0-5 | 7,1 | 34 | 29,1 | 20,4 | 50 | 12,4 | 50 | 1 |
| SL14<br>6 | S.<br>Latissim<br>a | 11/02/2<br>022 | Kvalsvik, Haugesund,<br>Rogaland | 59.437<br>829 | 5.2318<br>08 | KV | 0-5 | 7,1 | 34 | 19,6 | 8,14 | 50 | 1,93 | 50 | 1 |
| SL14<br>7 | S.<br>Latissim<br>a | 11/02/2<br>022 | Kvalsvik, Haugesund,<br>Rogaland | 59.437<br>829 | 5.2318<br>08 | KV | 0-5 | 7,1 | 34 | 28,7 | 7,22 | 50 | 1,91 | 50 | 1 |
| SL14<br>8 | S.<br>Latissim<br>a | 11/02/2<br>022 | Kvalsvik, Haugesund,<br>Rogaland | 59.437<br>829 | 5.2318<br>08 | KV | 0-5 | 7,1 | 34 | 32,2 | 50,8 | 50 | 9,16 | 50 | 1 |
| SL14<br>9 | S.<br>Latissim<br>a | 11/02/2<br>022 | Kvalsvik, Haugesund,<br>Rogaland | 59.437<br>829 | 5.2318<br>08 | KV | 0-5 | 7,1 | 34 | 30,1 | 108  | 50 | 16,9 | 50 | 1 |
| SL15<br>0 | S.<br>Latissim<br>a | 11/02/2<br>022 | Kvalsvik, Haugesund,<br>Rogaland | 59.437<br>829 | 5.2318<br>08 | KV | 0-5 | 7,1 | 34 | 30,7 | 13,4 | 50 | 2,84 | 50 | 1 |
| SL15<br>1 | S.<br>Latissim<br>a | 11/02/2<br>022 | Kvalsvik, Haugesund,<br>Rogaland | 59.437<br>829 | 5.2318<br>08 | KV | 0-5 | 7,1 | 34 | 24,6 | 100  | 50 | 31,8 | 50 | 1 |
| SL15<br>2 | S.<br>Latissim<br>a | 11/02/2<br>022 | Kvalsvik, Haugesund,<br>Rogaland | 59.437<br>829 | 5.2318<br>08 | KV | 0-5 | 7,1 | 34 | 25,5 | 31   | 50 | 15,9 | 50 | 1 |

|           |                 |                |                                  |               |              |    |     |     |    |      |      |    |      |    |   |
|-----------|-----------------|----------------|----------------------------------|---------------|--------------|----|-----|-----|----|------|------|----|------|----|---|
| SL15<br>3 | S.<br>Latissima | 11/02/2<br>022 | Kvalsvik, Haugesund,<br>Rogaland | 59.437<br>829 | 5.2318<br>08 | KV | 0-5 | 7,1 | 34 | 33,3 | 76,8 | 50 | 52,6 | 50 | 1 |
| SL15<br>4 | S.<br>Latissima | 11/02/2<br>022 | Kvalsvik, Haugesund,<br>Rogaland | 59.437<br>829 | 5.2318<br>08 | KV | 0-5 | 7,1 | 34 | 33   | 71,8 | 50 | 53,8 | 50 | 1 |
| SL15<br>5 | S.<br>Latissima | 11/02/2<br>022 | Kvalsvik, Haugesund,<br>Rogaland | 59.437<br>829 | 5.2318<br>08 | KV | 0-5 | 7,1 | 34 | 33,8 | 11,9 | 50 | 9,4  | 50 | 1 |
| SL15<br>6 | S.<br>Latissima | 11/02/2<br>022 | Kvalsvik, Haugesund,<br>Rogaland | 59.437<br>829 | 5.2318<br>08 | KV | 0-5 | 7,1 | 34 | 25,3 | 14,4 | 50 | 10,6 | 50 | 1 |
| SL15<br>7 | S.<br>Latissima | 11/02/2<br>022 | Kvalsvik, Haugesund,<br>Rogaland | 59.437<br>829 | 5.2318<br>08 | KV | 0-5 | 7,1 | 34 | 26,6 | 10,9 | 50 | 6,44 | 50 | 1 |
| SL15<br>8 | S.<br>Latissima | 11/02/2<br>022 | Kvalsvik, Haugesund,<br>Rogaland | 59.437<br>829 | 5.2318<br>08 | KV | 0-5 | 7,1 | 34 | 16,7 | 4,74 | 50 | 1,96 | 50 | 1 |
| SL15<br>9 | S.<br>Latissima | 11/02/2<br>022 | Kvalsvik, Haugesund,<br>Rogaland | 59.437<br>829 | 5.2318<br>08 | KV | 0-5 | 7,1 | 34 | 22,5 | 9,54 | 50 | 2,62 | 50 | 1 |
| SL16<br>0 | S.<br>Latissima | 11/02/2<br>022 | Kvalsvik, Haugesund,<br>Rogaland | 59.437<br>829 | 5.2318<br>08 | KV | 0-5 | 7,1 | 34 | 18,7 | 54,4 | 50 | 13,4 | 50 | 1 |
| SL16<br>1 | S.<br>Latissima | 11/02/2<br>022 | Kvalsvik, Haugesund,<br>Rogaland | 59.437<br>829 | 5.2318<br>08 | KV | 0-5 | 7,1 | 34 | 30   | 41,2 | 50 | 29,4 | 50 | 1 |
| SL16<br>2 | S.<br>Latissima | 11/02/2<br>022 | Kvalsvik, Haugesund,<br>Rogaland | 59.437<br>829 | 5.2318<br>08 | KV | 0-5 | 7,1 | 34 | 22,5 | 65,6 | 50 | 11,8 | 50 | 1 |
| SL16<br>3 | S.<br>Latissima | 11/02/2<br>022 | Storøy, Karmøy, Rogaland         | 59.410<br>729 | 5.2342<br>12 | S  | 0-5 | 7,1 | 34 | 17,9 | 6,04 | 50 | 8,52 | 50 | 1 |
| SL16<br>4 | S.<br>Latissima | 11/02/2<br>022 | Storøy, Karmøy, Rogaland         | 59.410<br>729 | 5.2342<br>12 | S  | 0-5 | 7,1 | 34 | 26,4 | 19   | 50 | 16,8 | 50 | 1 |
| SL16<br>5 | S.<br>Latissima | 11/02/2<br>022 | Storøy, Karmøy, Rogaland         | 59.410<br>729 | 5.2342<br>12 | S  | 0-5 | 7,1 | 34 | 33,4 | 30,4 | 50 | 27,2 | 50 | 1 |
| SL16<br>6 | S.<br>Latissima | 11/02/2<br>022 | Storøy, Karmøy, Rogaland         | 59.410<br>729 | 5.2342<br>12 | S  | 0-5 | 7,1 | 34 | 20,4 | 20,6 | 50 | 14,2 | 50 | 1 |

|           |                 |                |                          |               |              |   |     |     |    |      |      |    |      |    |   |
|-----------|-----------------|----------------|--------------------------|---------------|--------------|---|-----|-----|----|------|------|----|------|----|---|
| SL16<br>7 | S.<br>Latissima | 11/02/2<br>022 | Storøy, Karmøy, Rogaland | 59.410<br>729 | 5.2342<br>12 | S | 0-5 | 7,1 | 34 | 28,5 | 24,8 | 50 | 4,84 | 50 | 1 |
| SL16<br>8 | S.<br>Latissima | 11/02/2<br>022 | Storøy, Karmøy, Rogaland | 59.410<br>729 | 5.2342<br>12 | S | 0-5 | 7,1 | 34 | 24   | 5,44 | 50 | 4,66 | 50 | 1 |
| SL16<br>9 | S.<br>Latissima | 11/02/2<br>022 | Storøy, Karmøy, Rogaland | 59.410<br>729 | 5.2342<br>12 | S | 0-5 | 7,1 | 34 | 34,6 | 7,68 | 50 | 8,68 | 50 | 1 |
| SL17<br>0 | S.<br>Latissima | 11/02/2<br>022 | Storøy, Karmøy, Rogaland | 59.410<br>729 | 5.2342<br>12 | S | 0-5 | 7,1 | 34 | 21,8 | 5,28 | 50 | 7,2  | 50 | 1 |
| SL17<br>1 | S.<br>Latissima | 11/02/2<br>022 | Storøy, Karmøy, Rogaland | 59.410<br>729 | 5.2342<br>12 | S | 0-5 | 7,1 | 34 | 30   | 11,4 | 50 | 4,26 | 50 | 1 |
| SL17<br>2 | S.<br>Latissima | 11/02/2<br>022 | Storøy, Karmøy, Rogaland | 59.410<br>729 | 5.2342<br>12 | S | 0-5 | 7,1 | 34 | 25,4 | 6,16 | 50 | 2,84 | 50 | 1 |
| SL17<br>3 | S.<br>Latissima | 11/02/2<br>022 | Storøy, Karmøy, Rogaland | 59.410<br>729 | 5.2342<br>12 | S | 0-5 | 7,1 | 34 | 19,1 | 3,9  | 50 | 6,4  | 50 | 1 |
| SL17<br>4 | S.<br>Latissima | 11/02/2<br>022 | Storøy, Karmøy, Rogaland | 59.410<br>729 | 5.2342<br>12 | S | 0-5 | 7,1 | 34 | 18,2 | 5    | 50 | 2,18 | 50 | 1 |
| SL17<br>5 | S.<br>Latissima | 11/02/2<br>022 | Storøy, Karmøy, Rogaland | 59.410<br>729 | 5.2342<br>12 | S | 0-5 | 7,1 | 34 | 33,5 | 27,6 | 50 | 20,6 | 50 | 1 |
| SL17<br>6 | S.<br>Latissima | 11/02/2<br>022 | Storøy, Karmøy, Rogaland | 59.410<br>729 | 5.2342<br>12 | S | 0-5 | 7,1 | 34 | 31,5 | 52   | 50 | 19,3 | 50 | 1 |
| SL17<br>7 | S.<br>Latissima | 11/02/2<br>022 | Storøy, Karmøy, Rogaland | 59.410<br>729 | 5.2342<br>12 | S | 0-5 | 7,1 | 34 | 32,2 | 24,6 | 50 | 2,2  | 50 | 1 |
| SL17<br>8 | S.<br>Latissima | 11/02/2<br>022 | Storøy, Karmøy, Rogaland | 59.410<br>729 | 5.2342<br>12 | S | 0-5 | 7,1 | 34 | 18,6 | 3,56 | 50 | 2,42 | 50 | 1 |
| SL17<br>9 | S.<br>Latissima | 11/02/2<br>022 | Storøy, Karmøy, Rogaland | 59.410<br>729 | 5.2342<br>12 | S | 0-5 | 7,1 | 34 | 33,8 | 10,9 | 50 | 13   | 50 | 1 |
| SL18<br>0 | S.<br>Latissima | 11/02/2<br>022 | Storøy, Karmøy, Rogaland | 59.410<br>729 | 5.2342<br>12 | S | 0-5 | 7,1 | 34 | 24,9 | 17,3 | 50 | 1,62 | 50 | 1 |

|           |                 |                |                                  |               |              |    |     |     |    |      |      |    |      |    |   |
|-----------|-----------------|----------------|----------------------------------|---------------|--------------|----|-----|-----|----|------|------|----|------|----|---|
| SL18<br>1 | S.<br>Latissima | 11/02/2<br>022 | Storøy, Karmøy, Rogaland         | 59.410<br>729 | 5.2342<br>12 | S  | 0-5 | 7,1 | 34 | 18,3 | 4,76 | 50 | 6,82 | 50 | 1 |
| SL18<br>2 | S.<br>Latissima | 11/02/2<br>022 | Storøy, Karmøy, Rogaland         | 59.410<br>729 | 5.2342<br>12 | S  | 0-5 | 7,1 | 34 | 36,4 | 72,6 | 50 | 13,9 | 50 | 1 |
| SL18<br>3 | S.<br>Latissima | 11/02/2<br>022 | Storøy, Karmøy, Rogaland         | 59.410<br>729 | 5.2342<br>12 | S  | 0-5 | 7,1 | 34 | 22,9 | 39,8 | 50 | 38,8 | 50 | 1 |
| SL18<br>4 | S.<br>Latissima | 11/02/2<br>022 | Storøy, Karmøy, Rogaland         | 59.410<br>729 | 5.2342<br>12 | S  | 0-5 | 7,1 | 34 | 32,9 | 27,8 | 50 | 13,3 | 50 | 1 |
| SL18<br>5 | S.<br>Latissima | 11/02/2<br>022 | Storøy, Karmøy, Rogaland         | 59.410<br>729 | 5.2342<br>12 | S  | 0-5 | 7,1 | 34 | 28,9 | 106  | 50 | 25,8 | 50 | 1 |
| SL18<br>6 | S.<br>Latissima | 11/02/2<br>022 | Storøy, Karmøy, Rogaland         | 59.410<br>729 | 5.2342<br>12 | S  | 0-5 | 7,1 | 34 | 18,6 | 12,6 | 50 | 2,02 | 50 | 1 |
| SL18<br>7 | S.<br>Latissima | 11/02/2<br>022 | Storøy, Karmøy, Rogaland         | 59.410<br>729 | 5.2342<br>12 | S  | 0-5 | 7,1 | 34 | 29   | 15   | 50 | 4,36 | 50 | 1 |
| SL18<br>8 | S.<br>Latissima | 11/02/2<br>022 | Kvalsvik, Haugesund,<br>Rogaland | 59.437<br>829 | 5.2318<br>08 | KV | 0-5 | 7,1 | 34 | 33,6 | 18,9 | 50 | 11,8 | 50 | 1 |
| SL18<br>9 | S.<br>Latissima | 11/02/2<br>022 | Kvalsvik, Haugesund,<br>Rogaland | 59.437<br>829 | 5.2318<br>08 | KV | 0-5 | 7,1 | 34 | 26,6 | 40,6 | 50 | 6,98 | 50 | 1 |
| SL19<br>0 | S.<br>Latissima | 11/02/2<br>022 | Kvalsvik, Haugesund,<br>Rogaland | 59.437<br>829 | 5.2318<br>08 | KV | 0-5 | 7,1 | 34 | 36,8 | 76,2 | 50 | 17,6 | 50 | 1 |
| SL19<br>1 | S.<br>Latissima | 11/02/2<br>022 | Kvalsvik, Haugesund,<br>Rogaland | 59.437<br>829 | 5.2318<br>08 | KV | 0-5 | 7,1 | 34 | 27,5 | 44,2 | 50 | 39,2 | 50 | 1 |
| SL19<br>2 | S.<br>Latissima | 11/02/2<br>022 | Kvalsvik, Haugesund,<br>Rogaland | 59.437<br>829 | 5.2318<br>08 | KV | 0-5 | 7,1 | 34 | 26,4 | 9,58 | 50 | 4,36 | 50 | 1 |
| SL19<br>3 | S.<br>Latissima | 11/02/2<br>022 | Kvalsvik, Haugesund,<br>Rogaland | 59.437<br>829 | 5.2318<br>08 | KV | 0-5 | 7,1 | 34 | 21,9 | 24,2 | 50 | 15,9 | 50 | 1 |
| SL19<br>4 | S.<br>Latissima | 11/02/2<br>022 | Kvalsvik, Haugesund,<br>Rogaland | 59.437<br>829 | 5.2318<br>08 | KV | 0-5 | 7,1 | 34 | 29,8 | 46,8 | 50 | 10,1 | 50 | 1 |

|           |                 |                |                                     |               |              |   |     |     |    |      |      |    |      |    |   |
|-----------|-----------------|----------------|-------------------------------------|---------------|--------------|---|-----|-----|----|------|------|----|------|----|---|
| SL19<br>5 | S.<br>Latissima | 11/02/2<br>022 | Storøy, Karmøy, Rogaland            | 59.410<br>729 | 5.2342<br>12 | S | 0-5 | 7,1 | 34 | 22,6 | 51   | 50 | 15,6 | 50 | 1 |
| SL19<br>6 | S.<br>Latissima | 11/02/2<br>022 | Storøy, Karmøy, Rogaland            | 59.410<br>729 | 5.2342<br>12 | S | 0-5 | 7,1 | 34 | 24,1 | 73   | 50 | 27,2 | 50 | 1 |
| SL19<br>7 | S.<br>Latissima | 11/02/2<br>022 | Storøy, Karmøy, Rogaland            | 59.410<br>729 | 5.2342<br>12 | S | 0-5 | 7,1 | 34 | 27,2 | 61   | 50 | 60   | 50 | 1 |
| SL19<br>8 | S.<br>Latissima | 11/02/2<br>022 | Storøy, Karmøy, Rogaland            | 59.410<br>729 | 5.2342<br>12 | S | 0-5 | 7,1 | 34 | 32,4 | 27   | 50 | 9,76 | 50 | 1 |
| SL19<br>9 | S.<br>Latissima | 11/02/2<br>022 | Norheimsvågen, Karmøy,<br>Rogaland. | 59.378<br>957 | 5.2984<br>91 | N | 0-5 | 6,7 | 34 | 25,4 | 17,1 | 50 | 15,6 | 50 | 1 |
| SL20<br>0 | S.<br>Latissima | 11/02/2<br>022 | Norheimsvågen, Karmøy,<br>Rogaland. | 59.378<br>957 | 5.2984<br>91 | N | 0-5 | 6,7 | 34 | 27,8 | 25,8 | 50 | 6,74 | 50 | 1 |
| SL20<br>1 | S.<br>Latissima | 11/02/2<br>022 | Norheimsvågen, Karmøy,<br>Rogaland. | 59.378<br>957 | 5.2984<br>91 | N | 0-5 | 6,7 | 34 | 18,5 | 5,24 | 50 | 3,1  | 50 | 1 |
| SL20<br>2 | S.<br>Latissima | 11/02/2<br>022 | Norheimsvågen, Karmøy,<br>Rogaland. | 59.378<br>957 | 5.2984<br>91 | N | 0-5 | 6,7 | 34 | 14,4 | 3,74 | 50 | 1,73 | 50 | 1 |
| SL20<br>3 | S.<br>Latissima | 11/02/2<br>022 | Norheimsvågen, Karmøy,<br>Rogaland. | 59.378<br>957 | 5.2984<br>91 | N | 0-5 | 6,7 | 34 | 32,4 | 8,66 | 50 | 6,96 | 50 | 1 |
| SL20<br>4 | S.<br>Latissima | 11/02/2<br>022 | Norheimsvågen, Karmøy,<br>Rogaland. | 59.378<br>957 | 5.2984<br>91 | N | 0-5 | 6,7 | 34 | 23,2 | 8,54 | 50 | 6,68 | 50 | 0 |
| SL20<br>5 | S.<br>Latissima | 11/02/2<br>022 | Norheimsvågen, Karmøy,<br>Rogaland. | 59.378<br>957 | 5.2984<br>91 | N | 0-5 | 6,7 | 34 | 18,4 | 5,98 | 50 | 5,4  | 50 | 1 |
| SL20<br>6 | S.<br>Latissima | 11/02/2<br>022 | Norheimsvågen, Karmøy,<br>Rogaland. | 59.378<br>957 | 5.2984<br>91 | N | 0-5 | 6,7 | 34 | 32,6 | 59,4 | 50 | 16,6 | 50 | 1 |
| SL20<br>7 | S.<br>Latissima | 11/02/2<br>022 | Norheimsvågen, Karmøy,<br>Rogaland. | 59.378<br>957 | 5.2984<br>91 | N | 0-5 | 6,7 | 34 | 32,2 | 16,4 | 50 | 8,14 | 50 | 1 |
| SL20<br>8 | S.<br>Latissima | 11/02/2<br>022 | Norheimsvågen, Karmøy,<br>Rogaland. | 59.378<br>957 | 5.2984<br>91 | N | 0-5 | 6,7 | 34 | 22   | 17,6 | 50 | 4,36 | 50 | 1 |

|           |                     |                |                                     |               |              |   |     |     |    |      |      |    |      |    |   |
|-----------|---------------------|----------------|-------------------------------------|---------------|--------------|---|-----|-----|----|------|------|----|------|----|---|
| SL20<br>9 | S.<br>Latissim<br>a | 11/02/2<br>022 | Norheimsvågen, Karmøy,<br>Rogaland. | 59.378<br>957 | 5.2984<br>91 | N | 0-5 | 6,7 | 34 | 18,8 | 10,1 | 50 | 3,74 | 50 | 1 |
| SL21<br>0 | S.<br>Latissim<br>a | 11/02/2<br>022 | Norheimsvågen, Karmøy,<br>Rogaland. | 59.378<br>957 | 5.2984<br>91 | N | 0-5 | 6,7 | 34 | 20,8 | 13,3 | 50 | 6,06 | 50 | 1 |
| SL21<br>1 | S.<br>Latissim<br>a | 11/02/2<br>022 | Norheimsvågen, Karmøy,<br>Rogaland. | 59.378<br>957 | 5.2984<br>91 | N | 0-5 | 6,7 | 34 | 22,9 | 13,9 | 50 | 5,54 | 50 | 1 |
| SL21<br>2 | S.<br>Latissim<br>a | 11/02/2<br>022 | Norheimsvågen, Karmøy,<br>Rogaland. | 59.378<br>957 | 5.2984<br>91 | N | 0-5 | 6,7 | 34 | 22,9 | 13,9 | 50 | 7,38 | 50 | 1 |
| SL21<br>3 | S.<br>Latissim<br>a | 11/02/2<br>022 | Norheimsvågen, Karmøy,<br>Rogaland. | 59.378<br>957 | 5.2984<br>91 | N | 0-5 | 6,7 | 34 | 23,6 | 11,1 | 50 | 3,72 | 50 | 1 |
| SL21<br>4 | S.<br>Latissim<br>a | 11/02/2<br>022 | Norheimsvågen, Karmøy,<br>Rogaland. | 59.378<br>957 | 5.2984<br>91 | N | 0-5 | 6,7 | 34 | 22,4 | 15,1 | 50 | 8,5  | 50 | 1 |
| SL21<br>5 | S.<br>Latissim<br>a | 11/02/2<br>022 | Norheimsvågen, Karmøy,<br>Rogaland. | 59.378<br>957 | 5.2984<br>91 | N | 0-5 | 6,7 | 34 | 20,3 | 43,6 | 50 | 22,2 | 50 | 1 |
| SL21<br>6 | S.<br>Latissim<br>a | 11/02/2<br>022 | Norheimsvågen, Karmøy,<br>Rogaland. | 59.378<br>957 | 5.2984<br>91 | N | 0-5 | 6,7 | 34 | 17,4 | 4,52 | 50 | 4,7  | 50 | 1 |
| SL21<br>7 | S.<br>Latissim<br>a | 11/02/2<br>022 | Norheimsvågen, Karmøy,<br>Rogaland. | 59.378<br>957 | 5.2984<br>91 | N | 0-5 | 6,7 | 34 | 34,2 | 23,2 | 50 | 12   | 50 | 1 |
| SL21<br>8 | S.<br>Latissim<br>a | 11/02/2<br>022 | Norheimsvågen, Karmøy,<br>Rogaland. | 59.378<br>957 | 5.2984<br>91 | N | 0-5 | 6,7 | 34 | 31,1 | 25,2 | 50 | 5,66 | 50 | 1 |
| SL21<br>9 | S.<br>Latissim<br>a | 11/02/2<br>022 | Norheimsvågen, Karmøy,<br>Rogaland. | 59.378<br>957 | 5.2984<br>91 | N | 0-5 | 6,7 | 34 | 22,5 | 8,46 | 50 | 7,58 | 50 | 1 |
| SL22<br>0 | S.<br>Latissim<br>a | 11/02/2<br>022 | Norheimsvågen, Karmøy,<br>Rogaland. | 59.378<br>957 | 5.2984<br>91 | N | 0-5 | 6,7 | 34 | 25   | 11,7 | 50 | 5,94 | 50 | 1 |
| SL22<br>1 | S.<br>Latissim<br>a | 11/02/2<br>022 | Norheimsvågen, Karmøy,<br>Rogaland. | 59.378<br>957 | 5.2984<br>91 | N | 0-5 | 6,7 | 34 | 19,9 | 13,7 | 50 | 5,2  | 50 | 1 |
| SL22<br>2 | S.<br>Latissim<br>a | 11/02/2<br>022 | Norheimsvågen, Karmøy,<br>Rogaland. | 59.378<br>957 | 5.2984<br>91 | N | 0-5 | 6,7 | 34 | 24,4 | 7,66 | 50 | 13,1 | 50 | 1 |

|           |                 |                |                                     |               |              |   |     |     |    |      |      |    |      |    |   |
|-----------|-----------------|----------------|-------------------------------------|---------------|--------------|---|-----|-----|----|------|------|----|------|----|---|
| SL22<br>3 | S.<br>Latissima | 11/02/2<br>022 | Norheimsvågen, Karmøy,<br>Rogaland. | 59.378<br>957 | 5.2984<br>91 | N | 0-5 | 6,7 | 34 | 17   | 36,8 | 50 | 8,38 | 50 | 1 |
| SL22<br>4 | S.<br>Latissima | 11/02/2<br>022 | Norheimsvågen, Karmøy,<br>Rogaland. | 59.378<br>957 | 5.2984<br>91 | N | 0-5 | 6,7 | 34 | 30,7 | 34,4 | 50 | 7,5  | 50 | 1 |
| SL22<br>5 | S.<br>Latissima | 11/02/2<br>022 | Norheimsvågen, Karmøy,<br>Rogaland. | 59.378<br>957 | 5.2984<br>91 | N | 0-5 | 6,7 | 34 | 29,9 | 30,2 | 50 | 13,7 | 50 | 1 |
| SL22<br>6 | S.<br>Latissima | 11/02/2<br>022 | Norheimsvågen, Karmøy,<br>Rogaland. | 59.378<br>957 | 5.2984<br>91 | N | 0-5 | 6,7 | 34 | 23,8 | 12   | 50 | 4,4  | 50 | 1 |
| SL22<br>7 | S.<br>Latissima | 11/02/2<br>022 | Norheimsvågen, Karmøy,<br>Rogaland. | 59.378<br>957 | 5.2984<br>91 | N | 0-5 | 6,7 | 34 | 17,6 | 6,96 | 50 | 5,12 | 50 | 1 |
| SL22<br>8 | S.<br>Latissima | 11/02/2<br>022 | Norheimsvågen, Karmøy,<br>Rogaland. | 59.378<br>957 | 5.2984<br>91 | N | 0-5 | 6,7 | 34 | 27,2 | 11,4 | 50 | 3,06 | 50 | 1 |
| SL22<br>9 | S.<br>Latissima | 11/02/2<br>022 | Norheimsvågen, Karmøy,<br>Rogaland. | 59.378<br>957 | 5.2984<br>91 | N | 0-5 | 6,7 | 34 | 17,5 | 7,82 | 50 | 5,68 | 50 | 1 |
| SL23<br>0 | S.<br>Latissima | 11/02/2<br>022 | Norheimsvågen, Karmøy,<br>Rogaland. | 59.378<br>957 | 5.2984<br>91 | N | 0-5 | 6,7 | 34 | 20,7 | 10,7 | 50 | 8,78 | 50 | 1 |
| SL23<br>1 | S.<br>Latissima | 11/02/2<br>022 | Norheimsvågen, Karmøy,<br>Rogaland. | 59.378<br>957 | 5.2984<br>91 | N | 0-5 | 6,7 | 34 | 32,4 | 79   | 50 | 13   | 50 | 0 |
| SL23<br>2 | S.<br>Latissima | 11/02/2<br>022 | Norheimsvågen, Karmøy,<br>Rogaland. | 59.378<br>957 | 5.2984<br>91 | N | 0-5 | 6,7 | 34 | 23,3 | 15,6 | 50 | 14,9 | 50 | 1 |
| SL23<br>3 | S.<br>Latissima | 11/02/2<br>022 | Storøy, Karmøy, Rogaland            | 59.410<br>729 | 5.2342<br>12 | S | 0-5 | 7,1 | 34 | 24,9 | 31,8 | 50 | 7,78 | 50 | 1 |
| SL23<br>4 | S.<br>Latissima | 11/02/2<br>022 | Storøy, Karmøy, Rogaland            | 59.410<br>729 | 5.2342<br>12 | S | 0-5 | 7,1 | 34 | 25,1 | 66,4 | 50 | 16,3 | 50 | 1 |
| SL23<br>5 | S.<br>Latissima | 11/02/2<br>022 | Norheimsvågen, Karmøy,<br>Rogaland. | 59.378<br>957 | 5.2984<br>91 | N | 0-5 | 6,7 | 34 | 25,8 | 10,2 | 50 | 10   | 50 | 0 |
| SL23<br>6 | S.<br>Latissima | 11/02/2<br>022 | Norheimsvågen, Karmøy,<br>Rogaland. | 59.378<br>957 | 5.2984<br>91 | N | 0-5 | 6,7 | 34 | 22,1 | 34   | 50 | 8,28 | 50 | 1 |

|           |                     |                |                                     |               |              |   |     |     |    |      |      |    |      |    |   |
|-----------|---------------------|----------------|-------------------------------------|---------------|--------------|---|-----|-----|----|------|------|----|------|----|---|
| SL23<br>7 | S.<br>Latissim<br>a | 11/02/2<br>022 | Norheimsvågen, Karmøy,<br>Rogaland. | 59.378<br>957 | 5.2984<br>91 | N | 0-5 | 6,7 | 34 | 25,4 | 8,32 | 50 | 12   | 50 | 1 |
| SL23<br>8 | S.<br>Latissim<br>a | 11/02/2<br>022 | Norheimsvågen, Karmøy,<br>Rogaland. | 59.378<br>957 | 5.2984<br>91 | N | 0-5 | 6,7 | 34 | 31,1 | 24,4 | 50 | 12,2 | 50 | 1 |
| SL23<br>9 | S.<br>Latissim<br>a | 11/02/2<br>022 | Norheimsvågen, Karmøy,<br>Rogaland. | 59.378<br>957 | 5.2984<br>91 | N | 0-5 | 6,7 | 34 | 17,7 | 32   | 50 | 22,6 | 50 | 1 |
| SL24<br>0 | S.<br>Latissim<br>a | 11/02/2<br>022 | Norheimsvågen, Karmøy,<br>Rogaland. | 59.378<br>957 | 5.2984<br>91 | N | 0-5 | 6,7 | 34 | 25,5 | 17,5 | 50 | 11,3 | 50 | 1 |
| SL24<br>1 | S.<br>Latissim<br>a | 11/02/2<br>022 | Norheimsvågen, Karmøy,<br>Rogaland. | 59.378<br>957 | 5.2984<br>91 | N | 0-5 | 6,7 | 34 | 29,1 | 10,2 | 50 | 11,5 | 50 | 1 |
| SL24<br>2 | S.<br>Latissim<br>a | 11/02/2<br>022 | Norheimsvågen, Karmøy,<br>Rogaland. | 59.378<br>957 | 5.2984<br>91 | N | 0-5 | 6,7 | 34 | 31,2 | 12,8 | 50 | 14   | 50 | 1 |
| SL24<br>3 | S.<br>Latissim<br>a | 11/02/2<br>022 | Norheimsvågen, Karmøy,<br>Rogaland. | 59.378<br>957 | 5.2984<br>91 | N | 0-5 | 6,7 | 34 | 27,1 | 29,6 | 50 | 5,32 | 50 | 1 |
| SL24<br>4 | S.<br>Latissim<br>a | 11/02/2<br>022 | Norheimsvågen, Karmøy,<br>Rogaland. | 59.378<br>957 | 5.2984<br>91 | N | 0-5 | 6,7 | 34 | 34,1 | 13,4 | 50 | 8,28 | 50 | 1 |
| SL24<br>5 | S.<br>Latissim<br>a | 11/02/2<br>022 | Norheimsvågen, Karmøy,<br>Rogaland. | 59.378<br>957 | 5.2984<br>91 | N | 0-5 | 6,7 | 34 | 26,9 | 31   | 50 | 22,4 | 50 | 1 |
| SL24<br>6 | S.<br>Latissim<br>a | 11/02/2<br>022 | Norheimsvågen, Karmøy,<br>Rogaland. | 59.378<br>957 | 5.2984<br>91 | N | 0-5 | 6,7 | 34 | 18,9 | 15,2 | 50 | 15,6 | 50 | 1 |
| SL24<br>7 | S.<br>Latissim<br>a | 11/02/2<br>022 | Norheimsvågen, Karmøy,<br>Rogaland. | 59.378<br>957 | 5.2984<br>91 | N | 0-5 | 6,7 | 34 | 32,1 | 21,8 | 50 | 11,8 | 50 | 1 |
| SL24<br>8 | S.<br>Latissim<br>a | 11/02/2<br>022 | Norheimsvågen, Karmøy,<br>Rogaland. | 59.378<br>957 | 5.2984<br>91 | N | 0-5 | 6,7 | 34 | 40,9 | 118  | 50 | 66,8 | 50 | 1 |
| SL24<br>9 | S.<br>Latissim<br>a | 11/02/2<br>022 | Norheimsvågen, Karmøy,<br>Rogaland. | 59.378<br>957 | 5.2984<br>91 | N | 0-5 | 6,7 | 34 | 38,2 | 21,4 | 50 | 3,16 | 50 | 1 |
| SL25<br>0 | S.<br>Latissim<br>a | 11/02/2<br>022 | Norheimsvågen, Karmøy,<br>Rogaland. | 59.378<br>957 | 5.2984<br>91 | N | 0-5 | 6,7 | 34 | 17,7 | 10,4 | 50 | 2,6  | 50 | 1 |

|           |                 |                |                                     |               |              |   |     |     |    |      |      |    |      |    |   |
|-----------|-----------------|----------------|-------------------------------------|---------------|--------------|---|-----|-----|----|------|------|----|------|----|---|
| SL25<br>1 | S.<br>Latissima | 11/02/2<br>022 | Norheimsvågen, Karmøy,<br>Rogaland. | 59.378<br>957 | 5.2984<br>91 | N | 0-5 | 6,7 | 34 | 22,5 | 21,6 | 50 | 2,32 | 50 | 1 |
| SL25<br>2 | S.<br>Latissima | 11/02/2<br>022 | Norheimsvågen, Karmøy,<br>Rogaland. | 59.378<br>957 | 5.2984<br>91 | N | 0-5 | 6,7 | 34 | 29   | 23,4 | 50 | 12,9 | 50 | 1 |
| SL25<br>3 | S.<br>Latissima | 11/02/2<br>022 | Norheimsvågen, Karmøy,<br>Rogaland. | 59.378<br>957 | 5.2984<br>91 | N | 0-5 | 6,7 | 34 | 33,6 | 19,9 | 50 | 6,76 | 50 | 1 |
| SL25<br>4 | S.<br>Latissima | 11/02/2<br>022 | Norheimsvågen, Karmøy,<br>Rogaland. | 59.378<br>957 | 5.2984<br>91 | N | 0-5 | 6,7 | 34 | 30,8 | 6,18 | 50 | 6,08 | 50 | 1 |
| SL25<br>5 | S.<br>Latissima | 25/03/2<br>022 | Norheimsvågen, Karmøy,<br>Rogaland. | 59.378<br>957 | 5.2984<br>91 | N | 0-5 | 6,8 | 32 | 23,7 | 22,6 | 50 | 7,7  | 50 | 1 |
| SL25<br>6 | S.<br>Latissima | 25/03/2<br>022 | Norheimsvågen, Karmøy,<br>Rogaland. | 59.378<br>957 | 5.2984<br>91 | N | 0-5 | 6,8 | 32 | 38,7 | 14,2 | 50 | 2,76 | 50 | 1 |
| SL25<br>7 | S.<br>Latissima | 25/03/2<br>022 | Norheimsvågen, Karmøy,<br>Rogaland. | 59.378<br>957 | 5.2984<br>91 | N | 0-5 | 6,8 | 32 | 28,3 | 33,8 | 50 | 27,8 | 50 | 1 |
| SL25<br>8 | S.<br>Latissima | 25/03/2<br>022 | Norheimsvågen, Karmøy,<br>Rogaland. | 59.378<br>957 | 5.2984<br>91 | N | 0-5 | 6,8 | 32 | 32,1 | 23,2 | 50 | 14,8 | 50 | 1 |
| SL25<br>9 | S.<br>Latissima | 25/03/2<br>022 | Norheimsvågen, Karmøy,<br>Rogaland. | 59.378<br>957 | 5.2984<br>91 | N | 0-5 | 6,8 | 32 | 35   | 4    | 50 | 1,14 | 50 | 1 |
| SL26<br>0 | S.<br>Latissima | 25/03/2<br>022 | Norheimsvågen, Karmøy,<br>Rogaland. | 59.378<br>957 | 5.2984<br>91 | N | 0-5 | 6,8 | 32 | 30,8 | 22,4 | 50 | 8,04 | 50 | 1 |
| SL26<br>1 | S.<br>Latissima | 25/03/2<br>022 | Norheimsvågen, Karmøy,<br>Rogaland. | 59.378<br>957 | 5.2984<br>91 | N | 0-5 | 6,8 | 32 | 29,8 | 13,9 | 50 | 3,82 | 50 | 0 |
| SL26<br>2 | S.<br>Latissima | 25/03/2<br>022 | Norheimsvågen, Karmøy,<br>Rogaland. | 59.378<br>957 | 5.2984<br>91 | N | 0-5 | 6,8 | 32 | 21,9 | 10,9 | 50 | 1,29 | 50 | 1 |
| SL26<br>3 | S.<br>Latissima | 25/03/2<br>022 | Norheimsvågen, Karmøy,<br>Rogaland. | 59.378<br>957 | 5.2984<br>91 | N | 0-5 | 6,8 | 32 | 31,6 | 45   | 50 | 23,6 | 50 | 1 |
| SL26<br>4 | S.<br>Latissima | 25/03/2<br>022 | Norheimsvågen, Karmøy,<br>Rogaland. | 59.378<br>957 | 5.2984<br>91 | N | 0-5 | 6,8 | 32 | 22,9 | 18,2 | 50 | 2,72 | 50 | 0 |

|           |                 |                |                                     |               |              |   |     |     |    |      |      |    |         |    |   |
|-----------|-----------------|----------------|-------------------------------------|---------------|--------------|---|-----|-----|----|------|------|----|---------|----|---|
| SL26<br>5 | S.<br>Latissima | 25/03/2<br>022 | Norheimsvågen, Karmøy,<br>Rogaland. | 59.378<br>957 | 5.2984<br>91 | N | 0-5 | 6,8 | 32 | 26,5 | 18,1 | 50 | 8,64    | 50 | 1 |
| SL26<br>6 | S.<br>Latissima | 25/03/2<br>022 | Norheimsvågen, Karmøy,<br>Rogaland. | 59.378<br>957 | 5.2984<br>91 | N | 0-5 | 6,8 | 32 | 34,9 | 25   | 50 | 7,54    | 50 | 1 |
| SL26<br>7 | S.<br>Latissima | 25/03/2<br>022 | Norheimsvågen, Karmøy,<br>Rogaland. | 59.378<br>957 | 5.2984<br>91 | N | 0-5 | 6,8 | 32 | 28,1 | 20   | 50 | 9,54    | 50 | 0 |
| SL26<br>8 | S.<br>Latissima | 25/03/2<br>022 | Norheimsvågen, Karmøy,<br>Rogaland. | 59.378<br>957 | 5.2984<br>91 | N | 0-5 | 6,8 | 32 | 17,9 | 9,6  | 50 | 6,36    | 50 | 1 |
| SL26<br>9 | S.<br>Latissima | 25/03/2<br>022 | Norheimsvågen, Karmøy,<br>Rogaland. | 59.378<br>957 | 5.2984<br>91 | N | 0-5 | 6,8 | 32 | 24,8 | 16,6 | 50 | 16,9    | 50 | 1 |
| SL27<br>0 | S.<br>Latissima | 25/03/2<br>022 | Norheimsvågen, Karmøy,<br>Rogaland. | 59.378<br>957 | 5.2984<br>91 | N | 0-5 | 6,8 | 32 | 28,8 | 19,5 | 50 | 4,22    | 50 | 1 |
| SL27<br>1 | S.<br>Latissima | 25/03/2<br>022 | Norheimsvågen, Karmøy,<br>Rogaland. | 59.378<br>957 | 5.2984<br>91 | N | 0-5 | 6,8 | 32 | 16,2 | 12,9 | 50 | too low | 50 | 1 |
| SL27<br>2 | S.<br>Latissima | 25/03/2<br>022 | Norheimsvågen, Karmøy,<br>Rogaland. | 59.378<br>957 | 5.2984<br>91 | N | 0-5 | 6,8 | 32 | 19,4 | 38,8 | 50 | 12,6    | 50 | 1 |
| SL27<br>3 | S.<br>Latissima | 25/03/2<br>022 | Norheimsvågen, Karmøy,<br>Rogaland. | 59.378<br>957 | 5.2984<br>91 | N | 0-5 | 6,8 | 32 | 15,1 | 6,46 | 50 | 0,822   | 50 | 1 |
| SL27<br>4 | S.<br>Latissima | 25/03/2<br>022 | Norheimsvågen, Karmøy,<br>Rogaland. | 59.378<br>957 | 5.2984<br>91 | N | 0-5 | 6,8 | 32 | 17,8 | 8,3  | 50 | 1,19    | 50 | 1 |
| SL27<br>5 | S.<br>Latissima | 25/03/2<br>022 | Norheimsvågen, Karmøy,<br>Rogaland. | 59.378<br>957 | 5.2984<br>91 | N | 0-5 | 6,8 | 32 | 32,7 | 25,2 | 50 | 7,16    | 50 | 1 |
| SL27<br>6 | S.<br>Latissima | 25/03/2<br>022 | Norheimsvågen, Karmøy,<br>Rogaland. | 59.378<br>957 | 5.2984<br>91 | N | 0-5 | 6,8 | 32 | 11,8 | 4,98 | 50 | 0,918   | 50 | 1 |
| SL27<br>7 | S.<br>Latissima | 25/03/2<br>022 | Norheimsvågen, Karmøy,<br>Rogaland. | 59.378<br>957 | 5.2984<br>91 | N | 0-5 | 6,8 | 32 | 14,8 | 7,06 | 50 | 3,44    | 50 | 1 |
| SL27<br>8 | S.<br>Latissima | 25/03/2<br>022 | Norheimsvågen, Karmøy,<br>Rogaland. | 59.378<br>957 | 5.2984<br>91 | N | 0-5 | 6,8 | 32 | 30,5 | 15,4 | 50 | 21      | 50 | 1 |

|           |                 |                |                                     |               |              |   |     |     |    |      |      |    |       |    |   |
|-----------|-----------------|----------------|-------------------------------------|---------------|--------------|---|-----|-----|----|------|------|----|-------|----|---|
| SL27<br>9 | S.<br>Latissima | 25/03/2<br>022 | Norheimsvågen, Karmøy,<br>Rogaland. | 59.378<br>957 | 5.2984<br>91 | N | 0-5 | 6,8 | 32 | 15   | 7,34 | 50 | 8,88  | 50 | 0 |
| SL28<br>0 | S.<br>Latissima | 25/03/2<br>022 | Norheimsvågen, Karmøy,<br>Rogaland. | 59.378<br>957 | 5.2984<br>91 | N | 0-5 | 6,8 | 32 | 24,5 | 17,9 | 50 | 5,02  | 50 | 1 |
| SL28<br>1 | S.<br>Latissima | 25/03/2<br>022 | Norheimsvågen, Karmøy,<br>Rogaland. | 59.378<br>957 | 5.2984<br>91 | N | 0-5 | 6,8 | 32 | 19,2 | 8,42 | 50 | 1,79  | 50 | 1 |
| SL28<br>2 | S.<br>Latissima | 25/03/2<br>022 | Norheimsvågen, Karmøy,<br>Rogaland. | 59.378<br>957 | 5.2984<br>91 | N | 0-5 | 6,8 | 32 | 19   | 6,18 | 50 | 4,76  | 50 | 1 |
| SL28<br>3 | S.<br>Latissima | 25/03/2<br>022 | Norheimsvågen, Karmøy,<br>Rogaland. | 59.378<br>957 | 5.2984<br>91 | N | 0-5 | 6,8 | 32 | 34,7 | 33,2 | 50 | 16,9  | 50 | 1 |
| SL28<br>4 | S.<br>Latissima | 25/03/2<br>022 | Norheimsvågen, Karmøy,<br>Rogaland. | 59.378<br>957 | 5.2984<br>91 | N | 0-5 | 6,8 | 32 | 20,5 | 8,54 | 50 | 8,96  | 50 | 1 |
| SL28<br>5 | S.<br>Latissima | 25/03/2<br>022 | Norheimsvågen, Karmøy,<br>Rogaland. | 59.378<br>957 | 5.2984<br>91 | N | 0-5 | 6,8 | 32 | 33,4 | 12,9 | 50 | 11,1  | 50 | 1 |
| SL28<br>6 | S.<br>Latissima | 25/03/2<br>022 | Norheimsvågen, Karmøy,<br>Rogaland. | 59.378<br>957 | 5.2984<br>91 | N | 0-5 | 6,8 | 32 | 10,5 | 3,36 | 50 | 0,558 | 50 | 1 |
| SL28<br>7 | S.<br>Latissima | 25/03/2<br>022 | Norheimsvågen, Karmøy,<br>Rogaland. | 59.378<br>957 | 5.2984<br>91 | N | 0-5 | 6,8 | 32 | 34,1 | 15,2 | 50 | 2,78  | 50 | 1 |
| SL28<br>8 | S.<br>Latissima | 25/03/2<br>022 | Norheimsvågen, Karmøy,<br>Rogaland. | 59.378<br>957 | 5.2984<br>91 | N | 0-5 | 6,8 | 32 | 17,2 | 6,46 | 50 | 3,18  | 50 | 0 |
| SL28<br>9 | S.<br>Latissima | 25/03/2<br>022 | Norheimsvågen, Karmøy,<br>Rogaland. | 59.378<br>957 | 5.2984<br>91 | N | 0-5 | 6,8 | 32 | 27,2 | 12,7 | 50 | 8,24  | 50 | 1 |
| SL29<br>0 | S.<br>Latissima | 25/03/2<br>022 | Størøy, Haugesund,<br>Rogaland      | 59.410<br>729 | 5.2342<br>12 | S | 0-5 | 6,2 | 33 | 28,5 | 23   | 50 | 3,96  | 50 | 1 |
| SL29<br>1 | S.<br>Latissima | 25/03/2<br>022 | Størøy, Haugesund,<br>Rogaland      | 59.410<br>729 | 5.2342<br>12 | S | 0-5 | 6,2 | 33 | 31,6 | 36,4 | 50 | 25,8  | 50 | 1 |
| SL29<br>2 | S.<br>Latissima | 25/03/2<br>022 | Størøy, Haugesund,<br>Rogaland      | 59.410<br>729 | 5.2342<br>12 | S | 0-5 | 6,2 | 33 | 37,3 | 22,4 | 50 | 2,22  | 50 | 1 |

|           |                     |                |                                |               |              |   |     |     |    |      |      |    |       |    |   |
|-----------|---------------------|----------------|--------------------------------|---------------|--------------|---|-----|-----|----|------|------|----|-------|----|---|
| SL29<br>3 | S.<br>Latissim<br>a | 25/03/2<br>022 | Størøy, Haugesund,<br>Rogaland | 59.410<br>729 | 5.2342<br>12 | S | 0-5 | 6,2 | 33 | 20   | 20,8 | 50 | 5,86  | 50 | 1 |
| SL29<br>4 | S.<br>Latissim<br>a | 25/03/2<br>022 | Størøy, Haugesund,<br>Rogaland | 59.410<br>729 | 5.2342<br>12 | S | 0-5 | 6,2 | 33 | 33,4 | 9,9  | 50 | 9,08  | 50 | 1 |
| SL29<br>5 | S.<br>Latissim<br>a | 25/03/2<br>022 | Størøy, Haugesund,<br>Rogaland | 59.410<br>729 | 5.2342<br>12 | S | 0-5 | 6,2 | 33 | 37,5 | 88,2 | 50 | 62,6  | 50 | 1 |
| SL29<br>6 | S.<br>Latissim<br>a | 25/03/2<br>022 | Størøy, Haugesund,<br>Rogaland | 59.410<br>729 | 5.2342<br>12 | S | 0-5 | 6,2 | 33 | 28,2 | 15   | 50 | 2,1   | 50 | 1 |
| SL29<br>7 | S.<br>Latissim<br>a | 25/03/2<br>022 | Størøy, Haugesund,<br>Rogaland | 59.410<br>729 | 5.2342<br>12 | S | 0-5 | 6,2 | 33 | 32,5 | 16,4 | 50 | 4     | 50 | 1 |
| SL29<br>8 | S.<br>Latissim<br>a | 25/03/2<br>022 | Størøy, Haugesund,<br>Rogaland | 59.410<br>729 | 5.2342<br>12 | S | 0-5 | 6,2 | 33 | 31,7 | 5,54 | 50 | 0,984 | 50 | 1 |
| SL29<br>9 | S.<br>Latissim<br>a | 25/03/2<br>022 | Størøy, Haugesund,<br>Rogaland | 59.410<br>729 | 5.2342<br>12 | S | 0-5 | 6,2 | 33 | 19,9 | 7,16 | 50 | 1,65  | 50 | 1 |
| SL30<br>0 | S.<br>Latissim<br>a | 25/03/2<br>022 | Størøy, Haugesund,<br>Rogaland | 59.410<br>729 | 5.2342<br>12 | S | 0-5 | 6,2 | 33 | 22,4 | 20,8 | 50 | 23,6  | 50 | 1 |
| SL30<br>1 | S.<br>Latissim<br>a | 25/03/2<br>022 | Størøy, Haugesund,<br>Rogaland | 59.410<br>729 | 5.2342<br>12 | S | 0-5 | 6,2 | 33 | 32,8 | 9,02 | 50 | 9,96  | 50 | 1 |
| SL30<br>2 | S.<br>Latissim<br>a | 25/03/2<br>022 | Størøy, Haugesund,<br>Rogaland | 59.410<br>729 | 5.2342<br>12 | S | 0-5 | 6,2 | 33 | 24,1 | 28,6 | 50 | 19,3  | 50 | 1 |
| SL30<br>3 | S.<br>Latissim<br>a | 25/03/2<br>022 | Størøy, Haugesund,<br>Rogaland | 59.410<br>729 | 5.2342<br>12 | S | 0-5 | 6,2 | 33 | 24,2 | 27,4 | 50 | 15    | 50 | 1 |
| SL30<br>4 | S.<br>Latissim<br>a | 25/03/2<br>022 | Størøy, Haugesund,<br>Rogaland | 59.410<br>729 | 5.2342<br>12 | S | 0-5 | 6,2 | 33 | 28,3 | 23,8 | 50 | 8,2   | 50 | 1 |
| SL30<br>5 | S.<br>Latissim<br>a | 25/03/2<br>022 | Størøy, Haugesund,<br>Rogaland | 59.410<br>729 | 5.2342<br>12 | S | 0-5 | 6,2 | 33 | 36,4 | 9,36 | 50 | 13,8  | 50 | 1 |
| SL30<br>6 | S.<br>Latissim<br>a | 25/03/2<br>022 | Størøy, Haugesund,<br>Rogaland | 59.410<br>729 | 5.2342<br>12 | S | 0-5 | 6,2 | 33 | 24,8 | 43,6 | 50 | 22,2  | 50 | 1 |

|       |                 |            |                             |           |          |   |     |     |    |      |      |    |      |    |   |
|-------|-----------------|------------|-----------------------------|-----------|----------|---|-----|-----|----|------|------|----|------|----|---|
| SL307 | S.<br>Latissima | 25/03/2022 | Størøy, Haugesund, Rogaland | 59.410729 | 5.234212 | S | 0-5 | 6,2 | 33 | 26,3 | 32,2 | 50 | 15,1 | 50 | 1 |
| SL308 | S.<br>Latissima | 25/03/2022 | Størøy, Haugesund, Rogaland | 59.410729 | 5.234212 | S | 0-5 | 6,2 | 33 | 35   | 13,9 | 50 | 5,74 | 50 | 1 |
| SL309 | S.<br>Latissima | 25/03/2022 | Størøy, Haugesund, Rogaland | 59.410729 | 5.234212 | S | 0-5 | 6,2 | 33 | 26,7 | 15,7 | 50 | 11,4 | 50 | 1 |
| SL310 | S.<br>Latissima | 25/03/2022 | Størøy, Haugesund, Rogaland | 59.410729 | 5.234212 | S | 0-5 | 6,2 | 33 | 23,2 | 51,6 | 50 | 26,8 | 50 | 1 |
| SL311 | S.<br>Latissima | 25/03/2022 | Størøy, Haugesund, Rogaland | 59.410729 | 5.234212 | S | 0-5 | 6,2 | 33 | 33,2 | 23,6 | 50 | 42,2 | 50 | 1 |
| SL312 | S.<br>Latissima | 25/03/2022 | Størøy, Haugesund, Rogaland | 59.410729 | 5.234212 | S | 0-5 | 6,2 | 33 | 24,1 | 8,88 | 50 | 8,28 | 50 | 1 |
| SL313 | S.<br>Latissima | 25/03/2022 | Størøy, Haugesund, Rogaland | 59.410729 | 5.234212 | S | 0-5 | 6,2 | 33 | 21,9 | 9,1  | 50 | 5,16 | 50 | 1 |
| SL314 | S.<br>Latissima | 25/03/2022 | Størøy, Haugesund, Rogaland | 59.410729 | 5.234212 | S | 0-5 | 6,2 | 33 | 16,1 | 11   | 50 | 9,72 | 50 | 1 |
| SL315 | S.<br>Latissima | 25/03/2022 | Størøy, Haugesund, Rogaland | 59.410729 | 5.234212 | S | 0-5 | 6,2 | 33 | 22,2 | 8,82 | 50 | 2,14 | 50 | 1 |
| SL316 | S.<br>Latissima | 25/03/2022 | Størøy, Haugesund, Rogaland | 59.410729 | 5.234212 | S | 0-5 | 6,2 | 33 | 26   | 8,12 | 50 | 9,34 | 50 | 1 |
| SL317 | S.<br>Latissima | 25/03/2022 | Størøy, Haugesund, Rogaland | 59.410729 | 5.234212 | S | 0-5 | 6,2 | 33 | 22,1 | 27,8 | 50 | 23,2 | 50 | 1 |
| SL318 | S.<br>Latissima | 25/03/2022 | Størøy, Haugesund, Rogaland | 59.410729 | 5.234212 | S | 0-5 | 6,2 | 33 | 23,4 | 11,8 | 50 | 7,1  | 50 | 1 |
| SL319 | S.<br>Latissima | 25/03/2022 | Størøy, Haugesund, Rogaland | 59.410729 | 5.234212 | S | 0-5 | 6,2 | 33 | 14,7 | 8,14 | 50 | 4,58 | 50 | 1 |
| SL320 | S.<br>Latissima | 25/03/2022 | Størøy, Haugesund, Rogaland | 59.410729 | 5.234212 | S | 0-5 | 6,2 | 33 | 22,6 | 10,3 | 50 | 10,7 | 50 | 1 |

|           |                 |                |                                   |               |              |     |     |      |    |      |      |    |      |    |   |
|-----------|-----------------|----------------|-----------------------------------|---------------|--------------|-----|-----|------|----|------|------|----|------|----|---|
| SL32<br>1 | S.<br>Latissima | 25/03/2<br>022 | Størøy, Haugesund,<br>Rogaland    | 59.410<br>729 | 5.2342<br>12 | S   | 0-5 | 6,2  | 33 | 13,1 | 12,3 | 50 | 8,8  | 50 | 1 |
| SL32<br>2 | S.<br>Latissima | 25/03/2<br>022 | Størøy, Haugesund,<br>Rogaland    | 59.410<br>729 | 5.2342<br>12 | S   | 0-5 | 6,2  | 33 | 35,3 | 12,5 | 50 | 15,1 | 50 | 1 |
| SL32<br>3 | S.<br>Latissima | 25/03/2<br>022 | Størøy, Haugesund,<br>Rogaland    | 59.410<br>729 | 5.2342<br>12 | S   | 0-5 | 6,2  | 33 | 19,9 | 10,9 | 50 | 2,54 | 50 | 1 |
| SL32<br>4 | S.<br>Latissima | 25/03/2<br>022 | Størøy, Haugesund,<br>Rogaland    | 59.410<br>729 | 5.2342<br>12 | S   | 0-5 | 6,2  | 33 | 32   | 12,6 | 50 | 4,42 | 50 | 1 |
| SL32<br>5 | S.<br>Latissima | 25/03/2<br>022 | Størøy, Haugesund,<br>Rogaland    | 59.410<br>729 | 5.2342<br>12 | S   | 0-5 | 6,2  | 33 | 20   | 4,58 | 50 | 4,46 | 50 | 1 |
| SL32<br>6 | S.<br>Latissima | 25/03/2<br>022 | Størøy, Haugesund,<br>Rogaland    | 59.410<br>729 | 5.2342<br>12 | S   | 0-5 | 6,2  | 33 | 25,1 | 18,1 | 50 | 5,24 | 50 | 1 |
| SL32<br>7 | S.<br>Latissima | 25/03/2<br>022 | Størøy, Haugesund,<br>Rogaland    | 59.410<br>729 | 5.2342<br>12 | S   | 0-5 | 6,2  | 33 | 33,5 | 33,4 | 50 | 5,46 | 50 | 1 |
| SL32<br>8 | S.<br>Latissima | 25/03/2<br>022 | Størøy, Haugesund,<br>Rogaland    | 59.410<br>729 | 5.2342<br>12 | S   | 0-5 | 6,2  | 33 | 25,7 | 13,9 | 50 | 5,08 | 50 | 1 |
| SL32<br>9 | S.<br>Latissima | 25/03/2<br>022 | Størøy, Haugesund,<br>Rogaland    | 59.410<br>729 | 5.2342<br>12 | S   | 0-5 | 6,2  | 33 | 17,1 | 3,88 | 50 | 3,64 | 50 | 1 |
| SL33<br>0 | S.<br>Latissima | 15/06/2<br>022 | Korsfjorden, Bergen,<br>Hordaland | 60.240<br>977 | 5.2403<br>32 | K-2 | 0-5 | 13,6 | 31 | 27,4 | 12,8 | 50 | 8,68 | 50 | 1 |
| SL33<br>1 | S.<br>Latissima | 15/06/2<br>022 | Korsfjorden, Bergen,<br>Hordaland | 60.240<br>977 | 5.2403<br>32 | K-2 | 0-5 | 13,6 | 31 | 24,4 | 16,3 | 50 | 15,8 | 50 | 1 |
| SL33<br>2 | S.<br>Latissima | 15/06/2<br>022 | Korsfjorden, Bergen,<br>Hordaland | 60.240<br>977 | 5.2403<br>32 | K-2 | 0-5 | 13,6 | 31 | 15,9 | 3,4  | 50 | 3,38 | 50 | 1 |
| SL33<br>3 | S.<br>Latissima | 15/06/2<br>022 | Korsfjorden, Bergen,<br>Hordaland | 60.240<br>977 | 5.2403<br>32 | K-2 | 0-5 | 13,6 | 31 | 33,3 | 15,8 | 50 | 15,5 | 50 | 1 |
| SL33<br>4 | S.<br>Latissima | 15/06/2<br>022 | Korsfjorden, Bergen,<br>Hordaland | 60.240<br>977 | 5.2403<br>32 | K-2 | 0-5 | 13,6 | 31 | 30,4 | 24,4 | 50 | 5,14 | 50 | 1 |

|           |                     |                |                                   |               |              |     |     |      |    |      |      |    |       |    |   |
|-----------|---------------------|----------------|-----------------------------------|---------------|--------------|-----|-----|------|----|------|------|----|-------|----|---|
| SL33<br>5 | S.<br>Latissim<br>a | 15/06/2<br>022 | Korsfjorden, Bergen,<br>Hordaland | 60.240<br>977 | 5.2403<br>32 | K-2 | 0-5 | 13,6 | 31 | 15,5 | 3,74 | 50 | 3,46  | 50 | 1 |
| SL33<br>6 | S.<br>Latissim<br>a | 15/06/2<br>022 | Korsfjorden, Bergen,<br>Hordaland | 60.240<br>977 | 5.2403<br>32 | K-2 | 0-5 | 13,6 | 31 | 23,1 | 22,2 | 50 | 10,7  | 50 | 1 |
| SL33<br>7 | S.<br>Latissim<br>a | 15/06/2<br>022 | Korsfjorden, Bergen,<br>Hordaland | 60.240<br>977 | 5.2403<br>32 | K-2 | 0-5 | 13,6 | 31 | 20,5 | 8,84 | 50 | 8,84  | 50 | 1 |
| SL33<br>8 | S.<br>Latissim<br>a | 15/06/2<br>022 | Korsfjorden, Bergen,<br>Hordaland | 60.240<br>977 | 5.2403<br>32 | K-2 | 0-5 | 13,6 | 31 | 20,6 | 7,74 | 50 | 1,94  | 50 | 1 |
| SL33<br>9 | S.<br>Latissim<br>a | 15/06/2<br>022 | Korsfjorden, Bergen,<br>Hordaland | 60.240<br>977 | 5.2403<br>32 | K-2 | 0-5 | 13,6 | 31 | 33,3 | 22,8 | 50 | 14,5  | 50 | 1 |
| SL34<br>0 | S.<br>Latissim<br>a | 15/06/2<br>022 | Korsfjorden, Bergen,<br>Hordaland | 60.240<br>977 | 5.2403<br>32 | K-2 | 0-5 | 13,6 | 31 | 24,5 | 23,4 | 50 | 0,146 | 50 | 1 |
| SL34<br>1 | S.<br>Latissim<br>a | 15/06/2<br>022 | Korsfjorden, Bergen,<br>Hordaland | 60.240<br>977 | 5.2403<br>32 | K-2 | 0-5 | 13,6 | 31 | 16,5 | 1,75 | 50 | 3,26  | 50 | 1 |
| SL34<br>2 | S.<br>Latissim<br>a | 15/06/2<br>022 | Korsfjorden, Bergen,<br>Hordaland | 60.240<br>977 | 5.2403<br>32 | K-2 | 0-5 | 13,6 | 31 | 33,8 | 7,92 | 50 | 10,3  | 50 | 1 |
| SL34<br>3 | S.<br>Latissim<br>a | 15/06/2<br>022 | Korsfjorden, Bergen,<br>Hordaland | 60.240<br>977 | 5.2403<br>32 | K-2 | 0-5 | 13,6 | 31 | 24,7 | 8,14 | 50 | 8,6   | 50 | 1 |
| SL34<br>4 | S.<br>Latissim<br>a | 15/06/2<br>022 | Korsfjorden, Bergen,<br>Hordaland | 60.240<br>977 | 5.2403<br>32 | K-2 | 0-5 | 13,6 | 31 | 27,4 | 15,3 | 50 | 11,8  | 50 | 1 |
| SL34<br>5 | S.<br>Latissim<br>a | 15/06/2<br>022 | Korsfjorden, Bergen,<br>Hordaland | 60.240<br>977 | 5.2403<br>32 | K-2 | 0-5 | 13,6 | 31 | 22,1 | 7,52 | 50 | 5,36  | 50 | 1 |
| SL34<br>6 | S.<br>Latissim<br>a | 15/06/2<br>022 | Korsfjorden, Bergen,<br>Hordaland | 60.240<br>977 | 5.2403<br>32 | K-2 | 0-5 | 13,6 | 31 | 18,9 | 3,22 | 50 | 2,84  | 50 | 1 |
| SL34<br>7 | S.<br>Latissim<br>a | 15/06/2<br>022 | Korsfjorden, Bergen,<br>Hordaland | 60.240<br>977 | 5.2403<br>32 | K-2 | 0-5 | 13,6 | 31 | 28,5 | 26   | 50 | 21    | 50 | 1 |
| SL34<br>8 | S.<br>Latissim<br>a | 15/06/2<br>022 | Korsfjorden, Bergen,<br>Hordaland | 60.240<br>977 | 5.2403<br>32 | K-2 | 0-5 | 13,6 | 31 | 23,9 | 6,84 | 50 | 6,7   | 50 | 1 |

|           |                 |                |                                   |               |              |     |     |      |    |      |      |    |      |    |   |
|-----------|-----------------|----------------|-----------------------------------|---------------|--------------|-----|-----|------|----|------|------|----|------|----|---|
| SL34<br>9 | S.<br>Latissima | 15/06/2<br>022 | Korsfjorden, Bergen,<br>Hordaland | 60.240<br>977 | 5.2403<br>32 | K-2 | 0-5 | 13,6 | 31 | 15,9 | 7,34 | 50 | 7,38 | 50 | 1 |
| SL35<br>0 | S.<br>Latissima | 15/06/2<br>022 | Korsfjorden, Bergen,<br>Hordaland | 60.240<br>977 | 5.2403<br>32 | K-2 | 0-5 | 13,6 | 31 | 23   | 8,88 | 50 | 7,66 | 50 | 1 |
| SL35<br>1 | S.<br>Latissima | 15/06/2<br>022 | Korsfjorden, Bergen,<br>Hordaland | 60.240<br>977 | 5.2403<br>32 | K-2 | 0-5 | 13,6 | 31 | 28,9 | 6,28 | 50 | 1,69 | 50 | 1 |
| SL35<br>2 | S.<br>Latissima | 15/06/2<br>022 | Korsfjorden, Bergen,<br>Hordaland | 60.240<br>977 | 5.2403<br>32 | K-2 | 0-5 | 13,6 | 31 | 27,7 | 5,7  | 50 | 5,18 | 50 | 1 |
| SL35<br>3 | S.<br>Latissima | 26/10/2<br>022 | Korsfjorden, Bergen,<br>Hordaland | 60.240<br>977 | 5.2403<br>32 | K-2 | 0-5 | 10,8 | 31 | 23,2 | 6,96 | 50 | 12,6 | 50 | 1 |
| SL35<br>4 | S.<br>Latissima | 26/10/2<br>022 | Korsfjorden, Bergen,<br>Hordaland | 60.240<br>977 | 5.2403<br>32 | K-2 | 0-5 | 10,8 | 31 | 19,2 | 8,3  | 50 | 4,44 | 50 | 1 |
| SL35<br>5 | S.<br>Latissima | 26/10/2<br>022 | Korsfjorden, Bergen,<br>Hordaland | 60.240<br>977 | 5.2403<br>32 | K-2 | 0-5 | 10,8 | 31 | 21,5 | 5,48 | 50 | 11   | 50 | 1 |
| SL35<br>6 | S.<br>Latissima | 26/10/2<br>022 | Korsfjorden, Bergen,<br>Hordaland | 60.240<br>977 | 5.2403<br>32 | K-2 | 0-5 | 10,8 | 31 | 26,2 | 14,4 | 50 | 18,7 | 50 | 1 |
| SL35<br>7 | S.<br>Latissima | 26/10/2<br>022 | Korsfjorden, Bergen,<br>Hordaland | 60.240<br>977 | 5.2403<br>32 | K-2 | 0-5 | 10,8 | 31 | 21,7 | 4,22 | 50 | 2,7  | 50 | 1 |
| SL35<br>8 | S.<br>Latissima | 26/10/2<br>022 | Korsfjorden, Bergen,<br>Hordaland | 60.240<br>977 | 5.2403<br>32 | K-2 | 0-5 | 10,8 | 31 | 12,5 | 2,8  | 50 | 2,36 | 50 | 1 |
| SL35<br>9 | S.<br>Latissima | 26/10/2<br>022 | Korsfjorden, Bergen,<br>Hordaland | 60.240<br>977 | 5.2403<br>32 | K-2 | 0-5 | 10,8 | 31 | 26   | 4,22 | 50 | 4    | 50 | 1 |
| SL36<br>0 | S.<br>Latissima | 26/10/2<br>022 | Korsfjorden, Bergen,<br>Hordaland | 60.240<br>977 | 5.2403<br>32 | K-2 | 0-5 | 10,8 | 31 | 17,4 | 7,7  | 50 | 3,26 | 50 | 1 |
| SL36<br>1 | S.<br>Latissima | 26/10/2<br>022 | Korsfjorden, Bergen,<br>Hordaland | 60.240<br>977 | 5.2403<br>32 | K-2 | 0-5 | 10,8 | 31 | 25,1 | 21,2 | 50 | 23,4 | 50 | 1 |
| SL36<br>2 | S.<br>Latissima | 26/10/2<br>022 | Korsfjorden, Bergen,<br>Hordaland | 60.240<br>977 | 5.2403<br>32 | K-2 | 0-5 | 10,8 | 31 | 21,3 | 3,06 | 50 | 2,68 | 50 | 0 |

|           |                 |                |                                   |               |              |     |     |      |    |      |      |    |         |    |   |
|-----------|-----------------|----------------|-----------------------------------|---------------|--------------|-----|-----|------|----|------|------|----|---------|----|---|
| SL36<br>3 | S.<br>Latissima | 26/10/2<br>022 | Korsfjorden, Bergen,<br>Hordaland | 60.240<br>977 | 5.2403<br>32 | K-2 | 0-5 | 10,8 | 31 | 18,6 | 3,36 | 50 | 2,84    | 50 | 1 |
| SL36<br>4 | S.<br>Latissima | 26/10/2<br>022 | Korsfjorden, Bergen,<br>Hordaland | 60.240<br>977 | 5.2403<br>32 | K-2 | 0-5 | 10,8 | 31 | 16   | 9,68 | 50 | 2       | 50 | 1 |
| SL36<br>5 | S.<br>Latissima | 26/10/2<br>022 | Korsfjorden, Bergen,<br>Hordaland | 60.240<br>977 | 5.2403<br>32 | K-2 | 0-5 | 10,8 | 31 | 17,6 | 12,9 | 50 | 5,14    | 50 | 1 |
| SL36<br>6 | S.<br>Latissima | 26/10/2<br>022 | Korsfjorden, Bergen,<br>Hordaland | 60.240<br>977 | 5.2403<br>32 | K-2 | 0-5 | 10,8 | 31 | 18,7 | 3,92 | 50 | 5,16    | 50 | 1 |
| SL36<br>7 | S.<br>Latissima | 26/10/2<br>022 | Korsfjorden, Bergen,<br>Hordaland | 60.240<br>977 | 5.2403<br>32 | K-2 | 0-5 | 10,8 | 31 | 28,5 | 8,74 | 50 | 4,82    | 50 | 0 |
| SL36<br>8 | S.<br>Latissima | 26/10/2<br>022 | Korsfjorden, Bergen,<br>Hordaland | 60.240<br>977 | 5.2403<br>32 | K-2 | 0-5 | 10,8 | 31 | 24,5 | 9,76 | 50 | 5,3     | 50 | 1 |
| SL36<br>9 | S.<br>Latissima | 26/10/2<br>022 | Korsfjorden, Bergen,<br>Hordaland | 60.240<br>977 | 5.2403<br>32 | K-2 | 0-5 | 10,8 | 31 | 29,7 | 6,86 | 50 | 4,84    | 50 | 1 |
| SL37<br>0 | S.<br>Latissima | 26/10/2<br>022 | Korsfjorden, Bergen,<br>Hordaland | 60.240<br>977 | 5.2403<br>32 | K-2 | 0-5 | 10,8 | 31 | 29,7 | 13,4 | 50 | 12,9    | 50 | 1 |
| SL37<br>1 | S.<br>Latissima | 26/10/2<br>022 | Korsfjorden, Bergen,<br>Hordaland | 60.240<br>977 | 5.2403<br>32 | K-2 | 0-5 | 10,8 | 31 | 28,5 | 12,3 | 50 | 7,96    | 50 | 1 |
| SL37<br>2 | S.<br>Latissima | 26/10/2<br>022 | Korsfjorden, Bergen,<br>Hordaland | 60.240<br>977 | 5.2403<br>32 | K-2 | 0-5 | 10,8 | 31 | 18   | 5,22 | 50 | too low | 50 | 1 |

**Table S2: *L.hyperborea* samples (2021-2022).**

| Sam<br>ple | Species                  | Date           | Location              | Lat           | Long         | Sampling<br>station | Depth<br>(m) | AV Ta<br>(Celsius) | Salini<br>ty | Dry weight<br>(mg) | DNA 1<br>(ng/ul) | Volume<br>(ul) | DNA 2<br>(ng/ul) | Volume<br>(ul) | Virus<br>positive? |
|------------|--------------------------|----------------|-----------------------|---------------|--------------|---------------------|--------------|--------------------|--------------|--------------------|------------------|----------------|------------------|----------------|--------------------|
| LH1        | <i>L.hyperbo<br/>rea</i> | 17/06/2<br>021 | Vikna, Nord-Trondelag | 64.054<br>167 | 8.5991<br>67 | V                   | 5-10         | 10,3               | 34           | 23                 | 4,28             | 50             | 1,02             | 50             | 1                  |
| LH2        | <i>L.hyperbo<br/>rea</i> | 17/06/2<br>021 | Vikna, Nord-Trondelag | 64.054<br>167 | 8.5991<br>67 | V                   | 5-10         | 10,3               | 34           | 17                 | 5,36             | 50             | 1,77             | 50             | 0                  |
| LH3        | <i>L.hyperbo<br/>rea</i> | 17/06/2<br>021 | Vikna, Nord-Trondelag | 64.054<br>167 | 8.5991<br>67 | V                   | 5-10         | 10,3               | 34           | 15                 | 6,3              | 50             | 1,89             | 50             | 1                  |
| LH4        | <i>L.hyperbo<br/>rea</i> | 17/06/2<br>021 | Vikna, Nord-Trondelag | 64.054<br>167 | 8.5991<br>67 | V                   | 5-10         | 10,3               | 34           | 23                 | 8,72             | 50             | 1,91             | 50             | 1                  |
| LH5        | <i>L.hyperbo<br/>rea</i> | 17/06/2<br>021 | Vikna, Nord-Trondelag | 64.054<br>167 | 8.5991<br>67 | V                   | 5-10         | 10,3               | 34           | 18                 | 8,2              | 50             | 2,8              | 50             | 1                  |
| LH6        | <i>L.hyperbo<br/>rea</i> | 17/06/2<br>021 | Vikna, Nord-Trondelag | 64.054<br>167 | 8.5991<br>67 | V                   | 5-10         | 10,3               | 34           | 43                 | 2,66             | 50             | 0,472            | 50             | 1                  |
| LH7        | <i>L.hyperbo<br/>rea</i> | 17/06/2<br>021 | Vikna, Nord-Trondelag | 64.054<br>167 | 8.5991<br>67 | V                   | 5-10         | 10,3               | 34           | 20                 | 13,8             | 50             | 2,9              | 50             | 1                  |
| LH8        | <i>L.hyperbo<br/>rea</i> | 17/06/2<br>021 | Vikna, Nord-Trondelag | 64.054<br>167 | 8.5991<br>67 | V                   | 5-10         | 10,3               | 34           | 23                 | 4,02             | 50             | 0,354            | 50             | 1                  |
| LH9        | <i>L.hyperbo<br/>rea</i> | 17/06/2<br>021 | Vikna, Nord-Trondelag | 64.054<br>167 | 8.5991<br>67 | V                   | 5-10         | 10,3               | 34           | 21                 | 11,3             | 50             | 0,354            | 50             | 1                  |
| LH10       | <i>L.hyperbo<br/>rea</i> | 17/06/2<br>021 | Vikna, Nord-Trondelag | 64.054<br>167 | 8.5991<br>67 | V                   | 5-10         | 10,3               | 34           | 21                 | 4,48             | 50             | 1,4              | 50             | 1                  |
| LH11       | <i>L.hyperbo<br/>rea</i> | 17/06/2<br>021 | Vikna, Nord-Trondelag | 64.054<br>167 | 8.5991<br>67 | V                   | 5-10         | 10,3               | 34           | 21                 | 5,48             | 50             | 0,734            | 50             | 1                  |
| LH12       | <i>L.hyperbo<br/>rea</i> | 17/06/2<br>021 | Vikna, Nord-Trondelag | 64.054<br>167 | 8.5991<br>67 | V                   | 5-10         | 10,3               | 34           | 18                 | 11,2             | 50             | 2,42             | 50             | 1                  |
| LH13       | <i>L.hyperbo<br/>rea</i> | 17/06/2<br>021 | Vikna, Nord-Trondelag | 64.054<br>167 | 8.5991<br>67 | V                   | 5-10         | 10,3               | 34           | 21                 | 7,52             | 50             | 2,18             | 50             | 1                  |
| LH14       | <i>L.hyperbo<br/>rea</i> | 16/06/2<br>021 | Vikna, Nord-Trondelag | 64.054<br>167 | 8.5991<br>67 | V                   | 5-10         | 10,3               | 34           | 19                 | 14,5             | 50             | 3,2              | 50             | 1                  |
| LH15       | <i>L.hyperbo<br/>rea</i> | 16/06/2<br>021 | Vikna, Nord-Trondelag | 64.054<br>167 | 8.5991<br>67 | V                   | 5-10         | 10,3               | 34           | 23                 | 17,1             | 50             | 1,31             | 50             | 1                  |
| LH16       | <i>L.hyperbo<br/>rea</i> | 16/06/2<br>021 | Vikna, Nord-Trondelag | 64.054<br>167 | 8.5991<br>67 | V                   | 5-10         | 10,3               | 34           | 18                 | 8,1              | 50             | 2,68             | 50             | 1                  |
| LH17       | <i>L.hyperbo<br/>rea</i> | 16/06/2<br>021 | Vikna, Nord-Trondelag | 64.054<br>167 | 8.5991<br>67 | V                   | 5-10         | 10,3               | 34           | 19                 | 15,2             | 50             | 3,26             | 50             | 1                  |
| LH18       | <i>L.hyperbo<br/>rea</i> | 16/06/2<br>021 | Vikna, Nord-Trondelag | 64.054<br>167 | 8.5991<br>67 | V                   | 5-10         | 10,3               | 34           | 20                 | 6,64             | 50             | 1,85             | 50             | 1                  |
| LH19       | <i>L.hyperbo<br/>rea</i> | 16/06/2<br>021 | Vikna, Nord-Trondelag | 64.054<br>167 | 8.5991<br>67 | V                   | 5-10         | 10,3               | 34           | 25                 | 9,12             | 50             | 3,36             | 50             | 1                  |

|      |                          |                |                       |               |              |   |      |      |    |    |      |    |      |    |   |
|------|--------------------------|----------------|-----------------------|---------------|--------------|---|------|------|----|----|------|----|------|----|---|
| LH20 | <i>L.hyperbo<br/>rea</i> | 16/06/2<br>021 | Vikna, Nord-Trondelag | 64.054<br>167 | 8.5991<br>67 | V | 5-10 | 10,3 | 34 | 25 | 16,8 | 50 | 3,7  | 50 | 1 |
| LH21 | <i>L.hyperbo<br/>rea</i> | 16/06/2<br>021 | Vikna, Nord-Trondelag | 64.054<br>167 | 8.5991<br>67 | V | 5-10 | 10,3 | 34 | 15 | 8,94 | 50 | 2,68 | 50 | 1 |
| LH22 | <i>L.hyperbo<br/>rea</i> | 16/06/2<br>021 | Vikna, Nord-Trondelag | 64.054<br>167 | 8.5991<br>67 | V | 5-10 | 10,3 | 34 | 24 | 16,3 | 50 | 3,96 | 50 | 1 |
| LH23 | <i>L.hyperbo<br/>rea</i> | 16/06/2<br>021 | Vikna, Nord-Trondelag | 64.054<br>167 | 8.5991<br>67 | V | 5-10 | 10,3 | 34 | 15 | 14,4 | 50 | 2,7  | 50 | 1 |
| LH24 | <i>L.hyperbo<br/>rea</i> | 16/06/2<br>021 | Vikna, Nord-Trondelag | 64.054<br>167 | 8.5991<br>67 | V | 5-10 | 10,3 | 34 | 18 | 5,48 | 50 | 2,42 | 50 | 1 |
| LH25 | <i>L.hyperbo<br/>rea</i> | 16/06/2<br>021 | Vikna, Nord-Trondelag | 64.054<br>167 | 8.5991<br>67 | V | 5-10 | 10,3 | 34 | 15 | 3,52 | 50 | 1,62 | 50 | 1 |
| LH26 | <i>L.hyperbo<br/>rea</i> | 16/06/2<br>021 | Vikna, Nord-Trondelag | 64.054<br>167 | 8.5991<br>67 | V | 5-10 | 10,3 | 34 | 25 | 9,32 | 50 | 2,14 | 50 | 1 |
| LH27 | <i>L.hyperbo<br/>rea</i> | 16/06/2<br>021 | Vikna, Nord-Trondelag | 64.054<br>167 | 8.5991<br>67 | V | 5-10 | 10,3 | 34 | 22 | 6,82 | 50 | 2,18 | 50 | 1 |
| LH28 | <i>L.hyperbo<br/>rea</i> | 16/06/2<br>021 | Vikna, Nord-Trondelag | 64.054<br>167 | 8.5991<br>67 | V | 5-10 | 10,3 | 34 | 28 | 14,4 | 50 | 4,24 | 50 | 1 |
| LH29 | <i>L.hyperbo<br/>rea</i> | 16/06/2<br>021 | Vikna, Nord-Trondelag | 64.054<br>167 | 8.5991<br>67 | V | 5-10 | 10,3 | 34 | 19 | 14,3 | 50 | 2,64 | 50 | 1 |
| LH30 | <i>L.hyperbo<br/>rea</i> | 16/06/2<br>021 | Vikna, Nord-Trondelag | 64.054<br>167 | 8.5991<br>67 | V | 5-10 | 10,3 | 34 | 18 | 9,58 | 50 | 2,38 | 50 | 1 |
| LH31 | <i>L.hyperbo<br/>rea</i> | 16/06/2<br>021 | Vikna, Nord-Trondelag | 64.054<br>167 | 8.5991<br>67 | V | 5-10 | 10,3 | 34 | 15 | 9,68 | 50 | 2,44 | 50 | 0 |
| LH32 | <i>L.hyperbo<br/>rea</i> | 16/06/2<br>021 | Vikna, Nord-Trondelag | 64.054<br>167 | 8.5991<br>67 | V | 5-10 | 10,3 | 34 | 27 | 9,56 | 50 | 1,09 | 50 | 1 |
| LH33 | <i>L.hyperbo<br/>rea</i> | 16/06/2<br>021 | Vikna, Nord-Trondelag | 64.054<br>167 | 8.5991<br>67 | V | 5-10 | 10,3 | 34 | 26 | 14,1 | 50 | 2,28 | 50 | 1 |
| LH34 | <i>L.hyperbo<br/>rea</i> | 16/06/2<br>021 | Vikna, Nord-Trondelag | 64.054<br>167 | 8.5991<br>67 | V | 5-10 | 10,3 | 34 | 21 | 9,22 | 50 | 1,95 | 50 | 1 |
| LH35 | <i>L.hyperbo<br/>rea</i> | 16/06/2<br>021 | Vikna, Nord-Trondelag | 64.054<br>167 | 8.5991<br>67 | V | 5-10 | 10,3 | 34 | 20 | 11,7 | 50 | 1,91 | 50 | 1 |
| LH36 | <i>L.hyperbo<br/>rea</i> | 16/06/2<br>021 | Vikna, Nord-Trondelag | 64.054<br>167 | 8.5991<br>67 | V | 5-10 | 10,3 | 34 | 22 | 15,6 | 50 | 2,04 | 50 | 1 |
| LH37 | <i>L.hyperbo<br/>rea</i> | 16/06/2<br>021 | Vikna, Nord-Trondelag | 64.054<br>167 | 8.5991<br>67 | V | 5-10 | 10,3 | 34 | 18 | 9,62 | 50 | 9,62 | 50 | 1 |
| LH38 | <i>L.hyperbo<br/>rea</i> | 16/06/2<br>021 | Vikna, Nord-Trondelag | 64.054<br>167 | 8.5991<br>67 | V | 5-10 | 10,3 | 34 | 17 | 13,3 | 50 | 13,3 | 50 | 1 |
| LH39 | <i>L.hyperbo<br/>rea</i> | 27/07/2<br>021 | Bona Sea Rogaland     | 59.156<br>389 | 5.4955<br>56 | B | 5-10 | 15,2 | 32 | 62 | 7,14 | 50 | 1,99 | 50 | 1 |
| LH40 | <i>L.hyperbo<br/>rea</i> | 27/07/2<br>021 | Bona Sea Rogaland     | 59.156<br>389 | 5.4955<br>56 | B | 5-10 | 15,2 | 32 | 34 | 6,54 | 50 | 2    | 50 | 1 |

|      |                          |                |                   |               |              |   |      |      |    |      |      |    |       |    |   |
|------|--------------------------|----------------|-------------------|---------------|--------------|---|------|------|----|------|------|----|-------|----|---|
| LH41 | <i>L.hyperbo<br/>rea</i> | 27/07/2<br>021 | Bona Sea Rogaland | 59.156<br>389 | 5.4955<br>56 | B | 5-10 | 15,2 | 32 | 31   | 8,1  | 50 | 1,67  | 50 | 1 |
| LH42 | <i>L.hyperbo<br/>rea</i> | 27/07/2<br>021 | Bona Sea Rogaland | 59.156<br>389 | 5.4955<br>56 | B | 5-10 | 15,2 | 32 | 40   | 8,44 | 50 | 2,58  | 50 | 1 |
| LH43 | <i>L.hyperbo<br/>rea</i> | 27/07/2<br>021 | Bona Sea Rogaland | 59.156<br>389 | 5.4955<br>56 | B | 5-10 | 15,2 | 32 | 38   | 1,63 | 50 | 1,91  | 50 | 1 |
| LH44 | <i>L.hyperbo<br/>rea</i> | 27/07/2<br>021 | Bona Sea Rogaland | 59.156<br>389 | 5.4955<br>56 | B | 5-10 | 15,2 | 32 | 24   | 4,12 | 50 | 1,7   | 50 | 1 |
| LH45 | <i>L.hyperbo<br/>rea</i> | 27/07/2<br>021 | Bona Sea Rogaland | 59.156<br>389 | 5.4955<br>56 | B | 5-10 | 15,2 | 32 | 70   | 7,42 | 50 |       | 50 | 1 |
| LH46 | <i>L.hyperbo<br/>rea</i> | 27/07/2<br>021 | Bona Sea Rogaland | 59.156<br>389 | 5.4955<br>56 | B | 5-10 | 15,2 | 32 | 20   | 3,42 | 50 | 1,48  | 50 | 0 |
| LH47 | <i>L.hyperbo<br/>rea</i> | 27/07/2<br>021 | Bona Sea Rogaland | 59.156<br>389 | 5.4955<br>56 | B | 5-10 | 15,2 | 32 | 28   | 7,3  | 50 | 4,5   | 50 | 1 |
| LH48 | <i>L.hyperbo<br/>rea</i> | 27/07/2<br>021 | Bona Sea Rogaland | 59.156<br>389 | 5.4955<br>56 | B | 5-10 | 15,2 | 32 | 28   | 4,78 | 50 | 0,954 | 50 | 1 |
| LH49 | <i>L.hyperbo<br/>rea</i> | 27/07/2<br>021 | Bona Sea Rogaland | 59.156<br>389 | 5.4955<br>56 | B | 5-10 | 15,2 | 32 | 25   | 5,7  | 50 | 2     | 50 | 1 |
| LH50 | <i>L.hyperbo<br/>rea</i> | 27/07/2<br>021 | Bona Sea Rogaland | 59.156<br>389 | 5.4955<br>56 | B | 5-10 | 15,2 | 32 | 45   | 13   | 50 | 3,02  | 50 | 0 |
| LH51 | <i>L.hyperbo<br/>rea</i> | 27/07/2<br>021 | Bona Sea Rogaland | 59.156<br>389 | 5.4955<br>56 | B | 5-10 | 15,2 | 32 | 27   | 4,66 | 50 | 1,03  | 50 | 1 |
| LH52 | <i>L.hyperbo<br/>rea</i> | 27/07/2<br>021 | Bona Sea Rogaland | 59.156<br>389 | 5.4955<br>56 | B | 5-10 | 15,2 | 32 | 25   | 4,14 | 50 | 1,76  | 50 | 1 |
| LH53 | <i>L.hyperbo<br/>rea</i> | 27/07/2<br>021 | Bona Sea Rogaland | 59.156<br>389 | 5.4955<br>56 | B | 5-10 | 15,2 | 32 | 26   | 2,5  | 50 | 1,4   | 50 | 1 |
| LH54 | <i>L.hyperbo<br/>rea</i> | 27/07/2<br>021 | Bona Sea Rogaland | 59.156<br>389 | 5.4955<br>56 | B | 5-10 | 15,2 | 32 | 53   | 4,44 | 50 | 4,22  | 50 | 1 |
| LH55 | <i>L.hyperbo<br/>rea</i> | 27/07/2<br>021 | Bona Sea Rogaland | 59.156<br>389 | 5.4955<br>56 | B | 5-10 | 15,2 | 32 | 19,7 | 19,7 | 50 | 2,02  | 50 | 1 |
| LH56 | <i>L.hyperbo<br/>rea</i> | 27/07/2<br>021 | Bona Sea Rogaland | 59.156<br>389 | 5.4955<br>56 | B | 5-10 | 15,2 | 32 | 45,5 | 10,4 | 50 | 1,75  | 50 | 1 |
| LH57 | <i>L.hyperbo<br/>rea</i> | 27/07/2<br>021 | Bona Sea Rogaland | 59.156<br>389 | 5.4955<br>56 | B | 5-10 | 15,2 | 32 | 54   | 4,26 | 50 | 0,984 | 50 | 1 |
| LH58 | <i>L.hyperbo<br/>rea</i> | 27/07/2<br>021 | Bona Sea Rogaland | 59.156<br>389 | 5.4955<br>56 | B | 5-10 | 15,2 | 32 | 23,1 | 8,24 | 50 | 3,02  | 50 | 1 |
| LH59 | <i>L.hyperbo<br/>rea</i> | 27/07/2<br>021 | Bona Sea Rogaland | 59.156<br>389 | 5.4955<br>56 | B | 5-10 | 15,2 | 32 | 61   | 7,54 | 50 | 0,91  | 50 | 1 |
| LH60 | <i>L.hyperbo<br/>rea</i> | 27/07/2<br>021 | Bona Sea Rogaland | 59.156<br>389 | 5.4955<br>56 | B | 5-10 | 15,2 | 32 | 40   | 15,2 | 50 | 2,98  | 50 | 1 |
| LH61 | <i>L.hyperbo<br/>rea</i> | 27/07/2<br>021 | Bona Sea Rogaland | 59.156<br>389 | 5.4955<br>56 | B | 5-10 | 15,2 | 32 | 32   | 10   | 50 | 2,52  | 50 | 1 |

|      |                          |                |                   |               |              |   |      |      |    |      |      |    |      |    |   |
|------|--------------------------|----------------|-------------------|---------------|--------------|---|------|------|----|------|------|----|------|----|---|
| LH62 | <i>L.hyperbo<br/>rea</i> | 27/07/2<br>021 | Bona Sea Rogaland | 59.156<br>389 | 5.4955<br>56 | B | 5-10 | 15,2 | 32 | 26   | 9,8  | 50 | 4,22 | 50 | 1 |
| LH63 | <i>L.hyperbo<br/>rea</i> | 27/07/2<br>021 | Bona Sea Rogaland | 59.156<br>389 | 5.4955<br>56 | B | 5-10 | 15,2 | 32 | 14   | 7,76 | 50 | 1,68 | 50 | 1 |
| LH64 | <i>L.hyperbo<br/>rea</i> | 27/07/2<br>021 | Bona Sea Rogaland | 59.156<br>389 | 5.4955<br>56 | B | 5-10 | 15,2 | 32 | 16,6 | 8,42 | 50 | 3,1  | 50 | 1 |
| LH65 | <i>L.hyperbo<br/>rea</i> | 27/07/2<br>021 | Bona Sea Rogaland | 59.156<br>389 | 5.4955<br>56 | B | 5-10 | 15,2 | 32 | 24   | 9,2  | 50 |      | 50 | 1 |
| LH66 | <i>L.hyperbo<br/>rea</i> | 27/07/2<br>021 | Bona Sea Rogaland | 59.156<br>389 | 5.4955<br>56 | B | 5-10 | 15,2 | 32 | 24   | 10,4 | 50 |      | 50 | 1 |
| LH67 | <i>L.hyperbo<br/>rea</i> | 27/07/2<br>021 | Bona Sea Rogaland | 59.156<br>389 | 5.4955<br>56 | B | 5-10 | 15,2 | 32 | 28   | 11,6 | 50 |      | 50 | 1 |
| LH68 | <i>L.hyperbo<br/>rea</i> | 27/07/2<br>021 | Bona Sea Rogaland | 59.156<br>389 | 5.4955<br>56 | B | 5-10 | 15,2 | 32 | 29   | 7,84 | 50 |      | 50 | 1 |
| LH69 | <i>L.hyperbo<br/>rea</i> | 27/07/2<br>021 | Bona Sea Rogaland | 59.156<br>389 | 5.4955<br>56 | B | 5-10 | 15,2 | 32 | 30   | 11,9 | 50 |      | 50 | 1 |
| LH70 | <i>L.hyperbo<br/>rea</i> | 27/07/2<br>021 | Bona Sea Rogaland | 59.156<br>389 | 5.4955<br>56 | B | 5-10 | 15,2 | 32 | 23   | 10,2 | 50 |      | 50 | 1 |
| LH71 | <i>L.hyperbo<br/>rea</i> | 27/07/2<br>021 | Bona Sea Rogaland | 59.156<br>389 | 5.4955<br>56 | B | 5-10 | 15,2 | 32 | 20   | 2,94 | 50 |      | 50 | 1 |
| LH72 | <i>L.hyperbo<br/>rea</i> | 27/07/2<br>021 | Bona Sea Rogaland | 59.156<br>389 | 5.4955<br>56 | B | 5-10 | 15,2 | 32 | 28   | 14,5 | 50 |      | 50 | 1 |
| LH73 | <i>L.hyperbo<br/>rea</i> | 27/07/2<br>021 | Bona Sea Rogaland | 59.156<br>389 | 5.4955<br>56 | B | 5-10 | 15,2 | 32 | 18   | 7,76 | 50 |      | 50 | 1 |
| LH74 | <i>L.hyperbo<br/>rea</i> | 27/07/2<br>021 | Bona Sea Rogaland | 59.156<br>389 | 5.4955<br>56 | B | 5-10 | 15,2 | 32 | 22   | 10,1 | 50 |      | 50 | 1 |
| LH75 | <i>L.hyperbo<br/>rea</i> | 27/07/2<br>021 | Bona Sea Rogaland | 59.156<br>389 | 5.4955<br>56 | B | 5-10 | 15,2 | 32 | 29,2 | 10,9 | 50 |      | 50 | 1 |
| LH76 | <i>L.hyperbo<br/>rea</i> | 27/07/2<br>021 | Bona Sea Rogaland | 59.156<br>389 | 5.4955<br>56 | B | 5-10 | 15,2 | 32 | 28   | 5,44 | 50 |      | 50 | 1 |
| LH77 | <i>L.hyperbo<br/>rea</i> | 27/07/2<br>021 | Møre & Romsdal    | 62.481<br>667 | 5.6708<br>33 | M | 5-10 | 14,7 | 33 | 22   | 3,36 | 50 |      | 50 | 1 |
| LH78 | <i>L.hyperbo<br/>rea</i> | 27/07/2<br>021 | Møre & Romsdal    | 62.481<br>667 | 5.6708<br>33 | M | 5-10 | 14,7 | 33 | 19,3 | 11,3 | 50 |      | 50 | 1 |
| LH79 | <i>L.hyperbo<br/>rea</i> | 27/07/2<br>021 | Møre & Romsdal    | 62.481<br>667 | 5.6708<br>33 | M | 5-10 | 14,7 | 33 | 25   | 2,62 | 50 |      | 50 | 1 |
| LH80 | <i>L.hyperbo<br/>rea</i> | 27/07/2<br>021 | Møre & Romsdal    | 62.481<br>667 | 5.6708<br>33 | M | 5-10 | 14,7 | 33 | 22   | 3,74 | 50 |      | 50 | 1 |
| LH81 | <i>L.hyperbo<br/>rea</i> | 27/07/2<br>021 | Møre & Romsdal    | 62.481<br>667 | 5.6708<br>33 | M | 5-10 | 14,7 | 33 | 23   | 1,99 | 50 |      | 50 | 1 |
| LH82 | <i>L.hyperbo<br/>rea</i> | 27/07/2<br>021 | Møre & Romsdal    | 62.481<br>667 | 5.6708<br>33 | M | 5-10 | 14,7 | 33 | 25   | 2,14 | 50 |      | 50 | 1 |

|           |                          |                |                |               |              |   |      |      |    |      |      |    |  |    |   |
|-----------|--------------------------|----------------|----------------|---------------|--------------|---|------|------|----|------|------|----|--|----|---|
| LH83      | <i>L.hyperbo<br/>rea</i> | 27/07/2<br>021 | Møre & Romsdal | 62.481<br>667 | 5.6708<br>33 | M | 5-10 | 14,7 | 33 | 18   | 8,02 | 50 |  | 50 | 1 |
| LH84      | <i>L.hyperbo<br/>rea</i> | 27/07/2<br>021 | Møre & Romsdal | 62.481<br>667 | 5.6708<br>33 | M | 5-10 | 14,7 | 33 | 25   | 5,98 | 50 |  | 50 | 1 |
| LH85      | <i>L.hyperbo<br/>rea</i> | 27/07/2<br>021 | Møre & Romsdal | 62.481<br>667 | 5.6708<br>33 | M | 5-10 | 14,7 | 33 | 21   | 5,52 | 50 |  | 50 | 1 |
| LH86      | <i>L.hyperbo<br/>rea</i> | 27/07/2<br>021 | Møre & Romsdal | 62.481<br>667 | 5.6708<br>33 | M | 5-10 | 14,7 | 33 | 19   | 3,58 | 50 |  | 50 | 1 |
| LH87      | <i>L.hyperbo<br/>rea</i> | 27/07/2<br>021 | Møre & Romsdal | 62.481<br>667 | 5.6708<br>33 | M | 5-10 | 14,7 | 33 | 25   | 7,32 | 50 |  | 50 | 1 |
| LH88      | <i>L.hyperbo<br/>rea</i> | 27/07/2<br>021 | Møre & Romsdal | 62.481<br>667 | 5.6708<br>33 | M | 5-10 | 14,7 | 33 | 19   | 9,02 | 50 |  | 50 | 1 |
| LH89      | <i>L.hyperbo<br/>rea</i> | 27/07/2<br>021 | Møre & Romsdal | 62.481<br>667 | 5.6708<br>33 | M | 5-10 | 14,7 | 33 | 16   | 7,82 | 50 |  | 50 | 1 |
| LH90      | <i>L.hyperbo<br/>rea</i> | 27/07/2<br>021 | Møre & Romsdal | 62.481<br>667 | 5.6708<br>33 | M | 5-10 | 14,7 | 33 | 19,4 | 9,04 | 50 |  | 50 | 1 |
| LH91      | <i>L.hyperbo<br/>rea</i> | 27/07/2<br>021 | Møre & Romsdal | 62.481<br>667 | 5.6708<br>33 | M | 5-10 | 14,7 | 33 | 19,4 | 6,16 | 50 |  | 50 | 1 |
| LH92      | <i>L.hyperbo<br/>rea</i> | 27/07/2<br>021 | Møre & Romsdal | 62.481<br>667 | 5.6708<br>33 | M | 5-10 | 14,7 | 33 | 14,3 | 4,44 | 50 |  | 50 | 1 |
| LH93      | <i>L.hyperbo<br/>rea</i> | 27/07/2<br>021 | Møre & Romsdal | 62.481<br>667 | 5.6708<br>33 | M | 5-10 | 14,7 | 33 | 17,5 | 8,42 | 50 |  | 50 | 1 |
| LH94      | <i>L.hyperbo<br/>rea</i> | 27/07/2<br>021 | Møre & Romsdal | 62.481<br>667 | 5.6708<br>33 | M | 5-10 | 14,7 | 33 | 16,6 | 5,38 | 50 |  | 50 | 1 |
| LH95      | <i>L.hyperbo<br/>rea</i> | 27/07/2<br>021 | Møre & Romsdal | 62.481<br>667 | 5.6708<br>33 | M | 5-10 | 14,7 | 33 | 21   | 11   | 50 |  | 50 | 1 |
| LH96      | <i>L.hyperbo<br/>rea</i> | 27/07/2<br>021 | Møre & Romsdal | 62.481<br>667 | 5.6708<br>33 | M | 5-10 | 14,7 | 33 | 19   | 5,54 | 50 |  | 50 | 1 |
| LH97      | <i>L.hyperbo<br/>rea</i> | 27/07/2<br>021 | Møre & Romsdal | 62.481<br>667 | 5.6708<br>33 | M | 5-10 | 14,7 | 33 | 15,4 | 5,58 | 50 |  | 50 | 1 |
| LH98      | <i>L.hyperbo<br/>rea</i> | 27/07/2<br>021 | Møre & Romsdal | 62.481<br>667 | 5.6708<br>33 | M | 5-10 | 14,7 | 33 | 24,4 | 2,74 | 50 |  | 50 | 1 |
| LH99      | <i>L.hyperbo<br/>rea</i> | 27/07/2<br>021 | Møre & Romsdal | 62.481<br>667 | 5.6708<br>33 | M | 5-10 | 14,7 | 33 | 24   | 1,81 | 50 |  | 50 | 1 |
| LH10<br>0 | <i>L.hyperbo<br/>rea</i> | 27/07/2<br>021 | Møre & Romsdal | 62.481<br>667 | 5.6708<br>33 | M | 5-10 | 14,7 | 33 | 17   | 13   | 50 |  | 50 | 1 |
| LH10<br>1 | <i>L.hyperbo<br/>rea</i> | 27/07/2<br>021 | Møre & Romsdal | 62.481<br>667 | 5.6708<br>33 | M | 5-10 | 14,7 | 33 | 14   | 14,5 | 50 |  | 50 | 1 |
| LH10<br>2 | <i>L.hyperbo<br/>rea</i> | 27/07/2<br>021 | Møre & Romsdal | 62.481<br>667 | 5.6708<br>33 | M | 5-10 | 14,7 | 33 | 22   | 6,8  | 50 |  | 50 | 1 |
| LH10<br>3 | <i>L.hyperbo<br/>rea</i> | 27/07/2<br>021 | Møre & Romsdal | 62.481<br>667 | 5.6708<br>33 | M | 5-10 | 14,7 | 33 | 20   | 17   | 50 |  | 50 | 1 |

|           |                          |                |                                   |               |              |   |      |      |    |      |      |    |      |    |   |
|-----------|--------------------------|----------------|-----------------------------------|---------------|--------------|---|------|------|----|------|------|----|------|----|---|
| LH10<br>4 | <i>L.hyperbo<br/>rea</i> | 27/07/2<br>021 | Møre & Romsdal                    | 62.481<br>667 | 5.6708<br>33 | M | 5-10 | 14,7 | 33 | 20   | 15,5 | 50 |      | 50 | 1 |
| LH10<br>5 | <i>L.hyperbo<br/>rea</i> | 27/07/2<br>021 | Møre & Romsdal                    | 62.481<br>667 | 5.6708<br>33 | M | 5-10 | 14,7 | 33 | 22   | 5,94 | 50 |      | 50 | 1 |
| LH10<br>6 | <i>L.hyperbo<br/>rea</i> | 27/07/2<br>021 | Møre & Romsdal                    | 62.481<br>667 | 5.6708<br>33 | M | 5-10 | 14,7 | 33 | 25   | 10   | 50 |      | 50 | 1 |
| LH10<br>7 | <i>L.hyperbo<br/>rea</i> | 27/07/2<br>021 | Møre & Romsdal                    | 62.481<br>667 | 5.6708<br>33 | M | 5-10 | 14,7 | 33 | 18   | 25   | 50 |      | 50 | 1 |
| LH10<br>8 | <i>L.hyperbo<br/>rea</i> | 27/07/2<br>021 | Møre & Romsdal                    | 62.481<br>667 | 5.6708<br>33 | M | 5-10 | 14,7 | 33 | 20   | 12,7 | 50 |      | 50 | 1 |
| LH10<br>9 | <i>L.hyperbo<br/>rea</i> | 27/07/2<br>021 | Møre & Romsdal                    | 62.481<br>667 | 5.6708<br>33 | M | 5-10 | 14,7 | 33 | 20   | 9,88 | 50 |      | 50 | 1 |
| LH11<br>0 | <i>L.hyperbo<br/>rea</i> | 27/07/2<br>021 | Møre & Romsdal                    | 62.481<br>667 | 5.6708<br>33 | M | 5-10 | 14,7 | 33 | 15,2 | 9,58 | 50 |      | 50 | 1 |
| LH11<br>1 | <i>L.hyperbo<br/>rea</i> | 27/07/2<br>021 | Møre & Romsdal                    | 62.481<br>667 | 5.6708<br>33 | M | 5-10 | 14,7 | 33 | 20   | 10,1 | 50 |      | 50 | 1 |
| LH11<br>2 | <i>L.hyperbo<br/>rea</i> | 27/07/2<br>021 | Møre & Romsdal                    | 62.481<br>667 | 5.6708<br>33 | M | 5-10 | 14,7 | 33 | 20   | 15,2 | 50 |      | 50 | 1 |
| LH11<br>3 | <i>L.hyperbo<br/>rea</i> | 27/07/2<br>021 | Møre & Romsdal                    | 62.481<br>667 | 5.6708<br>33 | M | 5-10 | 14,7 | 33 | 17,6 | 11   | 50 |      | 50 | 1 |
| LH11<br>4 | <i>L.hyperbo<br/>rea</i> | 27/07/2<br>021 | Møre & Romsdal                    | 62.481<br>667 | 5.6708<br>33 | M | 5-10 | 14,7 | 33 | 14   | 8,36 | 50 |      | 50 | 1 |
| LH11<br>5 | <i>L.hyperbo<br/>rea</i> | 27/07/2<br>021 | Møre & Romsdal                    | 62.481<br>667 | 5.6708<br>33 | M | 5-10 | 14,7 | 33 | 23   | 7,86 | 50 |      | 50 | 1 |
| LH11<br>6 | <i>L.hyperbo<br/>rea</i> | 27/07/2<br>021 | Møre & Romsdal                    | 62.481<br>667 | 5.6708<br>33 | M | 5-10 | 14,7 | 33 | 21,7 | 12,2 | 50 |      | 50 | 1 |
| LH11<br>7 | <i>L.hyperbo<br/>rea</i> | 08/03/2<br>022 | Korsfjorden, Bergen,<br>Hordaland | 60.157<br>397 | 5.0063<br>40 | K | 0-5  | 6,3  | 33 | 23   | 7,28 | 50 | 4,36 | 50 | 1 |
| LH11<br>8 | <i>L.hyperbo<br/>rea</i> | 08/03/2<br>022 | Korsfjorden, Bergen,<br>Hordaland | 60.157<br>397 | 5.0063<br>40 | K | 0-5  | 6,3  | 33 | 27,3 | 20,4 | 50 | 8,72 | 50 | 1 |
| LH11<br>9 | <i>L.hyperbo<br/>rea</i> | 08/03/2<br>022 | Korsfjorden, Bergen,<br>Hordaland | 60.157<br>397 | 5.0063<br>40 | K | 0-5  | 6,3  | 33 | 27   | 52,2 | 50 | 9,06 | 50 | 1 |
| LH12<br>0 | <i>L.hyperbo<br/>rea</i> | 08/03/2<br>022 | Korsfjorden, Bergen,<br>Hordaland | 60.157<br>397 | 5.0063<br>40 | K | 0-5  | 6,3  | 33 | 23,4 | 12,4 | 50 | 2,64 | 50 | 1 |
| LH12<br>1 | <i>L.hyperbo<br/>rea</i> | 08/03/2<br>022 | Korsfjorden, Bergen,<br>Hordaland | 60.157<br>397 | 5.0063<br>40 | K | 0-5  | 6,3  | 33 | 29,9 | 31,6 | 50 | 3,68 | 50 | 1 |
| LH12<br>2 | <i>L.hyperbo<br/>rea</i> | 08/03/2<br>022 | Korsfjorden, Bergen,<br>Hordaland | 60.157<br>397 | 5.0063<br>40 | K | 0-5  | 6,3  | 33 | 33,7 | 38,4 | 50 | 13   | 50 | 1 |
| LH12<br>3 | <i>L.hyperbo<br/>rea</i> | 08/03/2<br>022 | Korsfjorden, Bergen,<br>Hordaland | 60.157<br>397 | 5.0063<br>40 | K | 0-5  | 6,3  | 33 | 21,9 | 32,2 | 50 | 5,74 | 50 | 1 |
| LH12<br>4 | <i>L.hyperbo<br/>rea</i> | 08/03/2<br>022 | Korsfjorden, Bergen,<br>Hordaland | 60.157<br>397 | 5.0063<br>40 | K | 0-5  | 6,3  | 33 | 24,2 | 26,6 | 50 | 7,42 | 50 | 1 |

|           |                          |                |                                   |               |              |   |     |     |    |      |      |    |      |    |   |
|-----------|--------------------------|----------------|-----------------------------------|---------------|--------------|---|-----|-----|----|------|------|----|------|----|---|
| LH12<br>5 | <i>L.hyperbo<br/>rea</i> | 08/03/2<br>022 | Korsfjorden, Bergen,<br>Hordaland | 60.157<br>397 | 5.0063<br>40 | K | 0-5 | 6,3 | 33 | 18,5 | 17,6 | 50 | 9,34 | 50 | 1 |
| LH12<br>6 | <i>L.hyperbo<br/>rea</i> | 08/03/2<br>022 | Korsfjorden, Bergen,<br>Hordaland | 60.157<br>397 | 5.0063<br>40 | K | 0-5 | 6,3 | 33 | 21   | 22,6 | 50 | 2,94 | 50 | 1 |
| LH12<br>7 | <i>L.hyperbo<br/>rea</i> | 08/03/2<br>022 | Korsfjorden, Bergen,<br>Hordaland | 60.157<br>397 | 5.0063<br>40 | K | 0-5 | 6,3 | 33 | 31   | 36,2 | 50 | 14,3 | 50 | 1 |
| LH12<br>8 | <i>L.hyperbo<br/>rea</i> | 08/03/2<br>022 | Korsfjorden, Bergen,<br>Hordaland | 60.157<br>397 | 5.0063<br>40 | K | 0-5 | 6,3 | 33 | 35,2 | 15,4 | 50 | 10,5 | 50 | 1 |
| LH12<br>9 | <i>L.hyperbo<br/>rea</i> | 08/03/2<br>022 | Korsfjorden, Bergen,<br>Hordaland | 60.157<br>397 | 5.0063<br>40 | K | 0-5 | 6,3 | 33 | 29,3 | 15,7 | 50 | 5,24 | 50 | 0 |
| LH13<br>0 | <i>L.hyperbo<br/>rea</i> | 08/03/2<br>022 | Korsfjorden, Bergen,<br>Hordaland | 60.157<br>397 | 5.0063<br>40 | K | 0-5 | 6,3 | 33 | 27   | 36,6 | 50 | 7,94 | 50 | 1 |
| LH13<br>1 | <i>L.hyperbo<br/>rea</i> | 08/03/2<br>022 | Korsfjorden, Bergen,<br>Hordaland | 60.157<br>397 | 5.0063<br>40 | K | 0-5 | 6,3 | 33 | 28,3 | 45,4 | 50 | 7,22 | 50 | 0 |
| LH13<br>2 | <i>L.hyperbo<br/>rea</i> | 08/03/2<br>022 | Korsfjorden, Bergen,<br>Hordaland | 60.157<br>397 | 5.0063<br>40 | K | 0-5 | 6,3 | 33 | 24,5 | 34,4 | 50 | 10,3 | 50 | 1 |
| LH13<br>3 | <i>L.hyperbo<br/>rea</i> | 08/03/2<br>022 | Korsfjorden, Bergen,<br>Hordaland | 60.157<br>397 | 5.0063<br>40 | K | 0-5 | 6,3 | 33 | 20,3 | 9,28 | 50 | 2,98 | 50 | 1 |
| LH13<br>4 | <i>L.hyperbo<br/>rea</i> | 08/03/2<br>022 | Korsfjorden, Bergen,<br>Hordaland | 60.157<br>397 | 5.0063<br>40 | K | 0-5 | 6,3 | 33 | 18,5 | 17,2 | 50 | 4,9  | 50 | 1 |
| LH13<br>5 | <i>L.hyperbo<br/>rea</i> | 08/03/2<br>022 | Korsfjorden, Bergen,<br>Hordaland | 60.157<br>397 | 5.0063<br>40 | K | 0-5 | 6,3 | 33 | 46   | 15   | 50 | 13,2 | 50 | 1 |
| LH13<br>6 | <i>L.hyperbo<br/>rea</i> | 08/03/2<br>022 | Korsfjorden, Bergen,<br>Hordaland | 60.157<br>397 | 5.0063<br>40 | K | 0-5 | 6,3 | 33 | 33,7 | 39,8 | 50 | 6,38 | 50 | 1 |
| LH13<br>7 | <i>L.hyperbo<br/>rea</i> | 08/03/2<br>022 | Korsfjorden, Bergen,<br>Hordaland | 60.157<br>397 | 5.0063<br>40 | K | 0-5 | 6,3 | 33 | 22   | 16,1 | 50 | 2,42 | 50 | 1 |
| LH13<br>8 | <i>L.hyperbo<br/>rea</i> | 08/03/2<br>022 | Korsfjorden, Bergen,<br>Hordaland | 60.157<br>397 | 5.0063<br>40 | K | 0-5 | 6,3 | 33 | 38,2 | 39,4 | 50 | 9,52 | 50 | 1 |
| LH13<br>9 | <i>L.hyperbo<br/>rea</i> | 08/03/2<br>022 | Korsfjorden, Bergen,<br>Hordaland | 60.157<br>397 | 5.0063<br>40 | K | 0-5 | 6,3 | 33 | 30   | 66   | 50 | 10   | 50 | 1 |
| LH14<br>0 | <i>L.hyperbo<br/>rea</i> | 08/03/2<br>022 | Korsfjorden, Bergen,<br>Hordaland | 60.157<br>397 | 5.0063<br>40 | K | 0-5 | 6,3 | 33 | 26   | 30,6 | 50 | 32,2 | 50 | 1 |
| LH14<br>1 | <i>L.hyperbo<br/>rea</i> | 08/03/2<br>022 | Korsfjorden, Bergen,<br>Hordaland | 60.157<br>397 | 5.0063<br>40 | K | 0-5 | 6,3 | 33 | 23,4 | 12,9 | 50 | 3,12 | 50 | 1 |
| LH14<br>2 | <i>L.hyperbo<br/>rea</i> | 08/03/2<br>022 | Korsfjorden, Bergen,<br>Hordaland | 60.157<br>397 | 5.0063<br>40 | K | 0-5 | 6,3 | 33 | 40   | 60,2 | 50 | 8,56 | 50 | 1 |
| LH14<br>3 | <i>L.hyperbo<br/>rea</i> | 08/03/2<br>022 | Korsfjorden, Bergen,<br>Hordaland | 60.157<br>397 | 5.0063<br>40 | K | 0-5 | 6,3 | 33 | 37   | 48,4 | 50 | 8,32 | 50 | 1 |
| LH14<br>4 | <i>L.hyperbo<br/>rea</i> | 08/03/2<br>022 | Korsfjorden, Bergen,<br>Hordaland | 60.157<br>397 | 5.0063<br>40 | K | 0-5 | 6,3 | 33 | 29,8 | 26,6 | 50 | 4,54 | 50 | 1 |
| LH14<br>5 | <i>L.hyperbo<br/>rea</i> | 08/03/2<br>022 | Korsfjorden, Bergen,<br>Hordaland | 60.157<br>397 | 5.0063<br>40 | K | 0-5 | 6,3 | 33 | 30,4 | 14,2 | 50 | 1,49 | 50 | 1 |

|           |                          |                |                                   |               |              |   |     |     |    |      |      |    |      |    |   |
|-----------|--------------------------|----------------|-----------------------------------|---------------|--------------|---|-----|-----|----|------|------|----|------|----|---|
| LH14<br>6 | <i>L.hyperbo<br/>rea</i> | 08/03/2<br>022 | Korsfjorden, Bergen,<br>Hordaland | 60.157<br>397 | 5.0063<br>40 | K | 0-5 | 6,3 | 33 | 38   | 37,6 | 50 | 20,6 | 50 | 1 |
| LH14<br>7 | <i>L.hyperbo<br/>rea</i> | 08/03/2<br>022 | Korsfjorden, Bergen,<br>Hordaland | 60.157<br>397 | 5.0063<br>40 | K | 0-5 | 6,3 | 33 | 32   | 36,4 | 50 | 15,8 | 50 | 1 |
| LH14<br>8 | <i>L.hyperbo<br/>rea</i> | 08/03/2<br>022 | Korsfjorden, Bergen,<br>Hordaland | 60.157<br>397 | 5.0063<br>40 | K | 0-5 | 6,3 | 33 | 33,6 | 49   | 50 | 29   | 50 | 1 |
| LH14<br>9 | <i>L.hyperbo<br/>rea</i> | 08/03/2<br>022 | Korsfjorden, Bergen,<br>Hordaland | 60.157<br>397 | 5.0063<br>40 | K | 0-5 | 6,3 | 33 | 43,8 | 32,6 | 50 | 13,9 | 50 | 1 |
| LH15<br>0 | <i>L.hyperbo<br/>rea</i> | 08/03/2<br>022 | Korsfjorden, Bergen,<br>Hordaland | 60.157<br>397 | 5.0063<br>40 | K | 0-5 | 6,3 | 33 | 38,5 | 28,8 | 50 | 5,5  | 50 | 1 |
| LH15<br>1 | <i>L.hyperbo<br/>rea</i> | 08/03/2<br>022 | Korsfjorden, Bergen,<br>Hordaland | 60.157<br>397 | 5.0063<br>40 | K | 0-5 | 6,3 | 33 | 22   | 14,7 | 50 | 6,62 | 50 | 1 |
| LH15<br>2 | <i>L.hyperbo<br/>rea</i> | 08/03/2<br>022 | Korsfjorden, Bergen,<br>Hordaland | 60.157<br>397 | 5.0063<br>40 | K | 0-5 | 6,3 | 33 | 46,8 | 26,4 | 50 | 8,1  | 50 | 1 |
| LH15<br>3 | <i>L.hyperbo<br/>rea</i> | 08/03/2<br>022 | Korsfjorden, Bergen,<br>Hordaland | 60.157<br>397 | 5.0063<br>40 | K | 0-5 | 6,3 | 33 | 35,7 | 12,9 | 50 | 6,96 | 50 | 1 |
| LH15<br>4 | <i>L.hyperbo<br/>rea</i> | 08/03/2<br>022 | Korsfjorden, Bergen,<br>Hordaland | 60.157<br>397 | 5.0063<br>40 | K | 0-5 | 6,3 | 33 | 23,6 | 24,4 | 50 | 3,56 | 50 | 1 |
| LH15<br>5 | <i>L.hyperbo<br/>rea</i> | 08/03/2<br>022 | Korsfjorden, Bergen,<br>Hordaland | 60.157<br>397 | 5.0063<br>40 | K | 0-5 | 6,3 | 33 | 23,7 | 36,2 | 50 | 12,3 | 50 | 1 |
| LH15<br>6 | <i>L.hyperbo<br/>rea</i> | 08/03/2<br>022 | Korsfjorden, Bergen,<br>Hordaland | 60.157<br>397 | 5.0063<br>40 | K | 0-5 | 6,3 | 33 | 15   | 8,24 | 50 | 1,23 | 50 | 1 |
| LH15<br>7 | <i>L.hyperbo<br/>rea</i> | 08/03/2<br>022 | Korsfjorden, Bergen,<br>Hordaland | 60.157<br>397 | 5.0063<br>40 | K | 0-5 | 6,3 | 33 | 36,2 | 48,2 | 50 | 10,1 | 50 | 1 |
| LH15<br>8 | <i>L.hyperbo<br/>rea</i> | 08/03/2<br>022 | Korsfjorden, Bergen,<br>Hordaland | 60.157<br>397 | 5.0063<br>40 | K | 0-5 | 6,3 | 33 | 33,7 | 18,8 | 50 | 9,42 | 50 | 1 |
| LH15<br>9 | <i>L.hyperbo<br/>rea</i> | 08/03/2<br>022 | Korsfjorden, Bergen,<br>Hordaland | 60.157<br>397 | 5.0063<br>40 | K | 0-5 | 6,3 | 33 | 24,5 | 16,9 | 50 | 2,56 | 50 | 1 |
| LH16<br>0 | <i>L.hyperbo<br/>rea</i> | 08/03/2<br>022 | Korsfjorden, Bergen,<br>Hordaland | 60.157<br>397 | 5.0063<br>40 | K | 0-5 | 6,3 | 33 | 24   | 19,8 | 50 | 5,68 | 50 | 1 |
| LH16<br>1 | <i>L.hyperbo<br/>rea</i> | 08/03/2<br>022 | Korsfjorden, Bergen,<br>Hordaland | 60.157<br>397 | 5.0063<br>40 | K | 0-5 | 6,3 | 33 | 27   | 23   | 50 | 9,64 | 50 | 1 |
| LH16<br>2 | <i>L.hyperbo<br/>rea</i> | 08/03/2<br>022 | Korsfjorden, Bergen,<br>Hordaland | 60.157<br>397 | 5.0063<br>40 | K | 0-5 | 6,3 | 33 | 20,3 | 12,3 | 50 | 2,74 | 50 | 1 |
| LH16<br>3 | <i>L.hyperbo<br/>rea</i> | 08/03/2<br>022 | Korsfjorden, Bergen,<br>Hordaland | 60.157<br>397 | 5.0063<br>40 | K | 0-5 | 6,3 | 33 | 40,8 | 45,8 | 50 | 2,74 | 50 | 1 |
| LH16<br>4 | <i>L.hyperbo<br/>rea</i> | 08/03/2<br>022 | Korsfjorden, Bergen,<br>Hordaland | 60.157<br>397 | 5.0063<br>40 | K | 0-5 | 6,3 | 33 | 34,4 | 68,6 | 50 | 8,1  | 50 | 1 |
| LH16<br>5 | <i>L.hyperbo<br/>rea</i> | 08/03/2<br>022 | Korsfjorden, Bergen,<br>Hordaland | 60.157<br>397 | 5.0063<br>40 | K | 0-5 | 6,3 | 33 | 37,5 | 33,4 | 50 | 2,62 | 50 | 1 |
| LH16<br>6 | <i>L.hyperbo<br/>rea</i> | 08/03/2<br>022 | Korsfjorden, Bergen,<br>Hordaland | 60.157<br>397 | 5.0063<br>40 | K | 0-5 | 6,3 | 33 | 13,8 | 6,84 | 50 | 1,34 | 50 | 1 |

|           |                          |                |                                   |               |              |   |     |     |    |      |          |    |      |    |   |
|-----------|--------------------------|----------------|-----------------------------------|---------------|--------------|---|-----|-----|----|------|----------|----|------|----|---|
| LH16<br>7 | <i>L.hyperbo<br/>rea</i> | 08/03/2<br>022 | Korsfjorden, Bergen,<br>Hordaland | 60.157<br>397 | 5.0063<br>40 | K | 0-5 | 6,3 | 33 | 46,3 | 23,4     | 50 | 1,71 | 50 | 1 |
| LH16<br>8 | <i>L.hyperbo<br/>rea</i> | 08/03/2<br>022 | Korsfjorden, Bergen,<br>Hordaland | 60.157<br>397 | 5.0063<br>40 | K | 0-5 | 6,3 | 33 | 23   | 18,3     | 50 | 1,77 | 50 | 1 |
| LH16<br>9 | <i>L.hyperbo<br/>rea</i> | 08/03/2<br>022 | Korsfjorden, Bergen,<br>Hordaland | 60.157<br>397 | 5.0063<br>40 | K | 0-5 | 6,3 | 33 | 22   | 12,1     | 50 | 1,88 | 50 | 1 |
| LH17<br>0 | <i>L.hyperbo<br/>rea</i> | 08/03/2<br>022 | Korsfjorden, Bergen,<br>Hordaland | 60.157<br>397 | 5.0063<br>40 | K | 0-5 | 6,3 | 33 | 30   | 57,4     | 50 | 15,3 | 50 | 1 |
| LH17<br>1 | <i>L.hyperbo<br/>rea</i> | 08/03/2<br>022 | Korsfjorden, Bergen,<br>Hordaland | 60.157<br>397 | 5.0063<br>40 | K | 0-5 | 6,3 | 33 | 21,5 | 11,5     | 50 | 2,6  | 50 | 1 |
| LH17<br>2 | <i>L.hyperbo<br/>rea</i> | 08/03/2<br>022 | Korsfjorden, Bergen,<br>Hordaland | 60.157<br>397 | 5.0063<br>40 | K | 0-5 | 6,3 | 33 | 23,9 | 13,3     | 50 | 19,9 | 50 | 1 |
| LH17<br>3 | <i>L.hyperbo<br/>rea</i> | 08/03/2<br>022 | Korsfjorden, Bergen,<br>Hordaland | 60.157<br>397 | 5.0063<br>40 | K | 0-5 | 6,3 | 33 | 31,8 | 73,6     | 50 | 17,2 | 50 | 1 |
| LH17<br>4 | <i>L.hyperbo<br/>rea</i> | 08/03/2<br>022 | Korsfjorden, Bergen,<br>Hordaland | 60.157<br>397 | 5.0063<br>40 | K | 0-5 | 6,3 | 33 | 27,5 | 30,6     | 50 | 19,8 | 50 | 1 |
| LH17<br>5 | <i>L.hyperbo<br/>rea</i> | 23/01/2<br>022 | Korsfjorden, Bergen,<br>Hordaland | 60.157<br>397 | 5.0063<br>40 | K | 0-5 | 7,2 | 33 | 27   | 34,2     | 50 | 4,76 | 50 | 1 |
| LH17<br>6 | <i>L.hyperbo<br/>rea</i> | 23/01/2<br>022 | Korsfjorden, Bergen,<br>Hordaland | 60.157<br>397 | 5.0063<br>40 | K | 0-5 | 7,2 | 33 | 31   | 24       | 50 | 8,32 | 50 | 1 |
| LH17<br>7 | <i>L.hyperbo<br/>rea</i> | 23/01/2<br>022 | Korsfjorden, Bergen,<br>Hordaland | 60.157<br>397 | 5.0063<br>40 | K | 0-5 | 7,2 | 33 | 31   | too high | 50 | 52,4 | 50 | 1 |
| LH17<br>8 | <i>L.hyperbo<br/>rea</i> | 23/01/2<br>022 | Korsfjorden, Bergen,<br>Hordaland | 60.157<br>397 | 5.0063<br>40 | K | 0-5 | 7,2 | 33 | 20,9 | 36,8     | 50 | 30,2 | 50 | 1 |
| LH17<br>9 | <i>L.hyperbo<br/>rea</i> | 23/01/2<br>022 | Korsfjorden, Bergen,<br>Hordaland | 60.157<br>397 | 5.0063<br>40 | K | 0-5 | 7,2 | 33 | 28   | 49,4     | 50 | 28,4 | 50 | 1 |
| LH18<br>0 | <i>L.hyperbo<br/>rea</i> | 08/03/2<br>022 | Korsfjorden, Bergen,<br>Hordaland | 60.157<br>397 | 5.0063<br>40 | K | 0-5 | 6,3 | 33 | 22,5 | 23,8     | 50 | 7,24 | 50 | 1 |
| LH18<br>1 | <i>L.hyperbo<br/>rea</i> | 08/03/2<br>022 | Korsfjorden, Bergen,<br>Hordaland | 60.157<br>397 | 5.0063<br>40 | K | 0-5 | 6,3 | 33 | 25,7 | 54       | 50 | 11,6 | 50 | 1 |
| LH18<br>2 | <i>L.hyperbo<br/>rea</i> | 08/03/2<br>022 | Korsfjorden, Bergen,<br>Hordaland | 60.157<br>397 | 5.0063<br>40 | K | 0-5 | 6,3 | 33 | 22,2 | 73,2     | 50 | 6,6  | 50 | 1 |
| LH18<br>3 | <i>L.hyperbo<br/>rea</i> | 08/03/2<br>022 | Korsfjorden, Bergen,<br>Hordaland | 60.157<br>397 | 5.0063<br>40 | K | 0-5 | 6,3 | 33 | 28,7 | 27,2     | 50 | 13,1 | 50 | 1 |
| LH18<br>4 | <i>L.hyperbo<br/>rea</i> | 08/03/2<br>022 | Korsfjorden, Bergen,<br>Hordaland | 60.157<br>397 | 5.0063<br>40 | K | 0-5 | 6,3 | 33 | 38,4 | 21,8     | 50 | 21,6 | 50 | 1 |
| LH18<br>5 | <i>L.hyperbo<br/>rea</i> | 08/03/2<br>022 | Korsfjorden, Bergen,<br>Hordaland | 60.157<br>397 | 5.0063<br>40 | K | 0-5 | 6,3 | 33 | 34,8 | 74,8     | 50 | 14,6 | 50 | 1 |
| LH18<br>6 | <i>L.hyperbo<br/>rea</i> | 08/03/2<br>022 | Korsfjorden, Bergen,<br>Hordaland | 60.157<br>397 | 5.0063<br>40 | K | 0-5 | 6,3 | 33 | 26,7 | 17,4     | 50 | 7,04 | 50 | 1 |
| LH18<br>7 | <i>L.hyperbo<br/>rea</i> | 08/03/2<br>022 | Korsfjorden, Bergen,<br>Hordaland | 60.157<br>397 | 5.0063<br>40 | K | 0-5 | 6,3 | 33 | 16,8 | 17,5     | 50 | 8,62 | 50 | 1 |

|       |                          |            |                                |           |          |   |     |      |    |      |      |    |      |    |   |
|-------|--------------------------|------------|--------------------------------|-----------|----------|---|-----|------|----|------|------|----|------|----|---|
| LH188 | <i>L.hyperbo<br/>rea</i> | 08/03/2022 | Korsfjorden, Bergen, Hordaland | 60.157397 | 5.006340 | K | 0-5 | 6,3  | 33 | 62,3 | 27,8 | 50 | 6,1  | 50 | 1 |
| LH189 | <i>L.hyperbo<br/>rea</i> | 08/03/2022 | Korsfjorden, Bergen, Hordaland | 60.157397 | 5.006340 | K | 0-5 | 6,3  | 33 | 28,2 | 49   | 50 | 28,4 | 50 | 1 |
| LH190 | <i>L.hyperbo<br/>rea</i> | 08/03/2022 | Korsfjorden, Bergen, Hordaland | 60.157397 | 5.006340 | K | 0-5 | 6,3  | 33 | 26,4 | 30,4 | 50 | 8,6  | 50 | 1 |
| LH191 | <i>L.hyperbo<br/>rea</i> | 08/03/2022 | Korsfjorden, Bergen, Hordaland | 60.157397 | 5.006340 | K | 0-5 | 6,3  | 33 | 18,7 | 15,8 | 50 | 11,1 | 50 | 1 |
| LH192 | <i>L.hyperbo<br/>rea</i> | 08/03/2022 | Korsfjorden, Bergen, Hordaland | 60.157397 | 5.006340 | K | 0-5 | 6,3  | 33 | 22,5 | 33,8 | 50 | 16,4 | 50 | 1 |
| LH193 | <i>L.hyperbo<br/>rea</i> | 08/03/2022 | Korsfjorden, Bergen, Hordaland | 60.157397 | 5.006340 | K | 0-5 | 6,3  | 33 | 25,4 | 49,6 | 50 | 24   | 50 | 1 |
| LH194 | <i>L.hyperbo<br/>rea</i> | 08/03/2022 | Korsfjorden, Bergen, Hordaland | 60.157397 | 5.006340 | K | 0-5 | 6,3  | 33 | 23,4 | 21,4 | 50 | 7,84 | 50 | 1 |
| LH195 | <i>L.hyperbo<br/>rea</i> | 08/03/2022 | Korsfjorden, Bergen, Hordaland | 60.157397 | 5.006340 | K | 0-5 | 6,3  | 33 | 23,6 | 93,6 | 50 | 54,2 | 50 | 1 |
| LH196 | <i>L.hyperbo<br/>rea</i> | 08/03/2022 | Korsfjorden, Bergen, Hordaland | 60.157397 | 5.006340 | K | 0-5 | 6,3  | 33 | 30,3 | 29   | 50 | 2,4  | 50 | 1 |
| LH197 | <i>L.hyperbo<br/>rea</i> | 08/03/2022 | Korsfjorden, Bergen, Hordaland | 60.157397 | 5.006340 | K | 0-5 | 6,3  | 33 | 26,6 | 29,6 | 50 | 6,94 | 50 | 1 |
| LH198 | <i>L.hyperbo<br/>rea</i> | 08/03/2022 | Korsfjorden, Bergen, Hordaland | 60.157397 | 5.006340 | K | 0-5 | 6,3  | 33 | 38,8 | 33,8 | 50 | 16,2 | 50 | 1 |
| LH199 | <i>L.hyperbo<br/>rea</i> | 08/03/2022 | Korsfjorden, Bergen, Hordaland | 60.157397 | 5.006340 | K | 0-5 | 6,3  | 33 | 32,9 | 64,2 | 50 | 16,8 | 50 | 1 |
| LH200 | <i>L.hyperbo<br/>rea</i> | 08/03/2022 | Korsfjorden, Bergen, Hordaland | 60.157397 | 5.006340 | K | 0-5 | 6,3  | 33 | 40,5 | 22,2 | 50 | 20   | 50 | 1 |
| LH201 | <i>L.hyperbo<br/>rea</i> | 23/01/2022 | Korsfjorden, Bergen, Hordaland | 60.157397 | 5.006340 | K | 0-5 | 7,2  | 33 | 26,7 | 23,8 | 50 | 14,8 | 50 | 1 |
| LH202 | <i>L.hyperbo<br/>rea</i> | 23/01/2022 | Korsfjorden, Bergen, Hordaland | 60.157397 | 5.006340 | K | 0-5 | 7,2  | 33 | 25,6 | 27   | 50 | 4,38 | 50 | 1 |
| LH203 | <i>L.hyperbo<br/>rea</i> | 23/01/2022 | Korsfjorden, Bergen, Hordaland | 60.157397 | 5.006340 | K | 0-5 | 7,2  | 33 | 25   | 13,5 | 50 | 2,46 | 50 | 1 |
| LH204 | <i>L.hyperbo<br/>rea</i> | 23/01/2022 | Korsfjorden, Bergen, Hordaland | 60.157397 | 5.006340 | K | 0-5 | 7,2  | 33 | 24,3 | 58,6 | 50 | 26,6 | 50 | 1 |
| LH205 | <i>L.hyperbo<br/>rea</i> | 23/01/2022 | Korsfjorden, Bergen, Hordaland | 60.157397 | 5.006340 | K | 0-5 | 7,2  | 33 | 24   | 17   | 50 | 3,9  | 50 | 1 |
| LH206 | <i>L.hyperbo<br/>rea</i> | 23/01/2022 | Korsfjorden, Bergen, Hordaland | 60.157397 | 5.006340 | K | 0-5 | 7,2  | 33 | 21,7 | 10,6 | 50 | 3,62 | 50 | 1 |
| LH207 | <i>L.hyperbo<br/>rea</i> | 23/01/2022 | Korsfjorden, Bergen, Hordaland | 60.157397 | 5.006340 | K | 0-5 | 7,2  | 33 | 20,7 | 24,8 | 50 | 9,26 | 50 | 1 |
| LH208 | <i>L.hyperbo<br/>rea</i> | 15/06/2022 | Korsfjorden, Bergen, Hordaland | 60.157397 | 5.006340 | K | 0-5 | 11,9 | 33 | 21,3 | 11,7 | 50 | 3,34 | 50 | 1 |

|       |                          |            |                                |           |          |   |     |      |    |      |      |    |      |    |   |
|-------|--------------------------|------------|--------------------------------|-----------|----------|---|-----|------|----|------|------|----|------|----|---|
| LH209 | <i>L.hyperbo<br/>rea</i> | 15/06/2022 | Korsfjorden, Bergen, Hordaland | 60.157397 | 5.006340 | K | 0-5 | 11,9 | 33 | 18,7 | 8,18 | 50 | 6,38 | 50 | 1 |
| LH210 | <i>L.hyperbo<br/>rea</i> | 15/06/2022 | Korsfjorden, Bergen, Hordaland | 60.157397 | 5.006340 | K | 0-5 | 11,9 | 33 | 23,1 | 9    | 50 | 1,56 | 50 | 1 |
| LH211 | <i>L.hyperbo<br/>rea</i> | 15/06/2022 | Korsfjorden, Bergen, Hordaland | 60.157397 | 5.006340 | K | 0-5 | 11,9 | 33 | 25,5 | 10,1 | 50 | 2,34 | 50 | 1 |
| LH212 | <i>L.hyperbo<br/>rea</i> | 15/06/2022 | Korsfjorden, Bergen, Hordaland | 60.157397 | 5.006340 | K | 0-5 | 11,9 | 33 | 24,9 | 9,38 | 50 | 1,82 | 50 | 1 |
| LH213 | <i>L.hyperbo<br/>rea</i> | 15/06/2022 | Korsfjorden, Bergen, Hordaland | 60.157397 | 5.006340 | K | 0-5 | 11,9 | 33 | 25,7 | 14,3 | 50 | 1,03 | 50 | 0 |
| LH214 | <i>L.hyperbo<br/>rea</i> | 15/06/2022 | Korsfjorden, Bergen, Hordaland | 60.157397 | 5.006340 | K | 0-5 | 11,9 | 33 | 28   | 7,08 | 50 | 6,96 | 50 | 1 |
| LH215 | <i>L.hyperbo<br/>rea</i> | 15/06/2022 | Korsfjorden, Bergen, Hordaland | 60.157397 | 5.006340 | K | 0-5 | 11,9 | 33 | 23,4 | 6,24 | 50 | 5,48 | 50 | 1 |
| LH216 | <i>L.hyperbo<br/>rea</i> | 15/06/2022 | Korsfjorden, Bergen, Hordaland | 60.157397 | 5.006340 | K | 0-5 | 11,9 | 33 | 28,2 | 10,1 | 50 | 1,51 | 50 | 1 |
| LH217 | <i>L.hyperbo<br/>rea</i> | 15/06/2022 | Korsfjorden, Bergen, Hordaland | 60.157397 | 5.006340 | K | 0-5 | 11,9 | 33 | 17,2 | 5,4  | 50 | 1,79 | 50 | 1 |
| LH218 | <i>L.hyperbo<br/>rea</i> | 15/06/2022 | Korsfjorden, Bergen, Hordaland | 60.157397 | 5.006340 | K | 0-5 | 11,9 | 33 | 18,3 | 6,72 | 50 | 3,48 | 50 | 1 |
| LH219 | <i>L.hyperbo<br/>rea</i> | 15/06/2022 | Korsfjorden, Bergen, Hordaland | 60.157397 | 5.006340 | K | 0-5 | 11,9 | 33 | 16,9 | 5,7  | 50 | 3,46 | 50 | 1 |
| LH220 | <i>L.hyperbo<br/>rea</i> | 15/06/2022 | Korsfjorden, Bergen, Hordaland | 60.157397 | 5.006340 | K | 0-5 | 11,9 | 33 | 17   | 8,74 | 50 | 2,42 | 50 | 1 |
| LH221 | <i>L.hyperbo<br/>rea</i> | 15/06/2022 | Korsfjorden, Bergen, Hordaland | 60.157397 | 5.006340 | K | 0-5 | 11,9 | 33 | 21,5 | 9,3  | 50 | 4,9  | 50 | 1 |
| LH222 | <i>L.hyperbo<br/>rea</i> | 15/06/2022 | Korsfjorden, Bergen, Hordaland | 60.157397 | 5.006340 | K | 0-5 | 11,9 | 33 | 18,3 | 11,6 | 50 | 2,26 | 50 | 1 |
| LH223 | <i>L.hyperbo<br/>rea</i> | 15/06/2022 | Korsfjorden, Bergen, Hordaland | 60.157397 | 5.006340 | K | 0-5 | 11,9 | 33 | 29,1 | 8,38 | 50 | 1,25 | 50 | 1 |
| LH224 | <i>L.hyperbo<br/>rea</i> | 15/06/2022 | Korsfjorden, Bergen, Hordaland | 60.157397 | 5.006340 | K | 0-5 | 11,9 | 33 | 28,1 | 16,3 | 50 | 2,74 | 50 | 1 |
| LH225 | <i>L.hyperbo<br/>rea</i> | 15/06/2022 | Korsfjorden, Bergen, Hordaland | 60.157397 | 5.006340 | K | 0-5 | 11,9 | 33 | 27,6 | 18   | 50 | 12   | 50 | 1 |
| LH226 | <i>L.hyperbo<br/>rea</i> | 15/06/2022 | Korsfjorden, Bergen, Hordaland | 60.157397 | 5.006340 | K | 0-5 | 11,9 | 33 | 24,5 | 10,6 | 50 | 7,32 | 50 | 1 |
| LH227 | <i>L.hyperbo<br/>rea</i> | 15/06/2022 | Korsfjorden, Bergen, Hordaland | 60.157397 | 5.006340 | K | 0-5 | 11,9 | 33 | 17,7 | 5,34 | 50 | 3,16 | 50 | 1 |
| LH228 | <i>L.hyperbo<br/>rea</i> | 15/06/2022 | Korsfjorden, Bergen, Hordaland | 60.157397 | 5.006340 | K | 0-5 | 11,9 | 33 | 12,2 | 3,52 | 50 | 3,08 | 50 | 1 |
| LH229 | <i>L.hyperbo<br/>rea</i> | 15/06/2022 | Korsfjorden, Bergen, Hordaland | 60.157397 | 5.006340 | K | 0-5 | 11,9 | 33 | 30,1 | 2,68 | 50 | 0,8  | 50 | 1 |

|           |                          |                |                                   |               |              |   |     |      |    |      |      |    |      |    |   |
|-----------|--------------------------|----------------|-----------------------------------|---------------|--------------|---|-----|------|----|------|------|----|------|----|---|
| LH23<br>0 | <i>L.hyperbo<br/>rea</i> | 15/06/2<br>022 | Korsfjorden, Bergen,<br>Hordaland | 60.157<br>397 | 5.0063<br>40 | K | 0-5 | 11,9 | 33 | 31,9 | 9,54 | 50 | 3,56 | 50 | 1 |
| LH23<br>1 | <i>L.hyperbo<br/>rea</i> | 15/06/2<br>022 | Korsfjorden, Bergen,<br>Hordaland | 60.157<br>397 | 5.0063<br>40 | K | 0-5 | 11,9 | 33 | 30   | 13,3 | 50 | 2,28 | 50 | 1 |
| LH23<br>2 | <i>L.hyperbo<br/>rea</i> | 15/06/2<br>022 | Korsfjorden, Bergen,<br>Hordaland | 60.157<br>397 | 5.0063<br>40 | K | 0-5 | 11,9 | 33 | 29,8 | 10,4 | 50 | 4,18 | 50 | 1 |
| LH23<br>3 | <i>L.hyperbo<br/>rea</i> | 15/06/2<br>022 | Korsfjorden, Bergen,<br>Hordaland | 60.157<br>397 | 5.0063<br>40 | K | 0-5 | 11,9 | 33 | 23,4 | 12   | 50 | 5,8  | 50 | 1 |
| LH23<br>4 | <i>L.hyperbo<br/>rea</i> | 15/06/2<br>022 | Korsfjorden, Bergen,<br>Hordaland | 60.157<br>397 | 5.0063<br>40 | K | 0-5 | 11,9 | 33 | 27,3 | 4,2  | 50 | 2,7  | 50 | 1 |
| LH23<br>5 | <i>L.hyperbo<br/>rea</i> | 15/06/2<br>022 | Korsfjorden, Bergen,<br>Hordaland | 60.157<br>397 | 5.0063<br>40 | K | 0-5 | 11,9 | 33 | 34   | 8,48 | 50 | 7,9  | 50 | 1 |
| LH23<br>6 | <i>L.hyperbo<br/>rea</i> | 15/06/2<br>022 | Korsfjorden, Bergen,<br>Hordaland | 60.157<br>397 | 5.0063<br>40 | K | 0-5 | 11,9 | 33 | 28,3 | 9,04 | 50 | 4,36 | 50 | 1 |
| LH23<br>7 | <i>L.hyperbo<br/>rea</i> | 15/06/2<br>022 | Korsfjorden, Bergen,<br>Hordaland | 60.157<br>397 | 5.0063<br>40 | K | 0-5 | 11,9 | 33 | 30,4 | 13,8 | 50 | 10,7 | 50 | 1 |
| LH23<br>8 | <i>L.hyperbo<br/>rea</i> | 15/06/2<br>022 | Korsfjorden, Bergen,<br>Hordaland | 60.157<br>397 | 5.0063<br>40 | K | 0-5 | 11,9 | 33 | 36,3 | 13,3 | 50 | 8,18 | 50 | 1 |
| LH23<br>9 | <i>L.hyperbo<br/>rea</i> | 15/06/2<br>022 | Korsfjorden, Bergen,<br>Hordaland | 60.157<br>397 | 5.0063<br>40 | K | 0-5 | 11,9 | 33 | 22,6 | 16   | 50 | 10,5 | 50 | 1 |
| LH24<br>0 | <i>L.hyperbo<br/>rea</i> | 15/06/2<br>022 | Korsfjorden, Bergen,<br>Hordaland | 60.157<br>397 | 5.0063<br>40 | K | 0-5 | 11,9 | 33 | 30,8 | 17,1 | 50 | 2,28 | 50 | 1 |
| LH24<br>1 | <i>L.hyperbo<br/>rea</i> | 15/06/2<br>022 | Korsfjorden, Bergen,<br>Hordaland | 60.157<br>397 | 5.0063<br>40 | K | 0-5 | 11,9 | 33 | 27,5 | 6,22 | 50 | 3    | 50 | 1 |
| LH24<br>2 | <i>L.hyperbo<br/>rea</i> | 15/06/2<br>022 | Korsfjorden, Bergen,<br>Hordaland | 60.157<br>397 | 5.0063<br>40 | K | 0-5 | 11,9 | 33 | 26,9 | 8,64 | 50 | 8,76 | 50 | 1 |
| LH24<br>3 | <i>L.hyperbo<br/>rea</i> | 15/06/2<br>022 | Korsfjorden, Bergen,<br>Hordaland | 60.157<br>397 | 5.0063<br>40 | K | 0-5 | 11,9 | 33 | 30,3 | 7,92 | 50 | 3,72 | 50 | 1 |
| LH24<br>4 | <i>L.hyperbo<br/>rea</i> | 15/06/2<br>022 | Korsfjorden, Bergen,<br>Hordaland | 60.157<br>397 | 5.0063<br>40 | K | 0-5 | 11,9 | 33 | 28,1 | 4,94 | 50 | 4,54 | 50 | 1 |
| LH24<br>5 | <i>L.hyperbo<br/>rea</i> | 15/06/2<br>022 | Korsfjorden, Bergen,<br>Hordaland | 60.157<br>397 | 5.0063<br>40 | K | 0-5 | 11,9 | 33 | 30,9 | 3,94 | 50 | 1,91 | 50 | 1 |
| LH24<br>6 | <i>L.hyperbo<br/>rea</i> | 15/06/2<br>022 | Korsfjorden, Bergen,<br>Hordaland | 60.157<br>397 | 5.0063<br>40 | K | 0-5 | 11,9 | 33 | 30,9 | 10,9 | 50 | 1,9  | 50 | 1 |
| LH24<br>7 | <i>L.hyperbo<br/>rea</i> | 15/06/2<br>022 | Korsfjorden, Bergen,<br>Hordaland | 60.157<br>397 | 5.0063<br>40 | K | 0-5 | 11,9 | 33 | 31   | 11,3 | 50 | 5,12 | 50 | 1 |
| LH24<br>8 | <i>L.hyperbo<br/>rea</i> | 26/10/2<br>022 | Korsfjorden, Bergen,<br>Hordaland | 60.157<br>397 | 5.0063<br>40 | K | 0-5 | 11,3 | 32 | 19,9 | 2,08 | 50 | 1,19 | 50 | 1 |
| LH24<br>9 | <i>L.hyperbo<br/>rea</i> | 26/10/2<br>022 | Korsfjorden, Bergen,<br>Hordaland | 60.157<br>397 | 5.0063<br>40 | K | 0-5 | 11,3 | 32 | 36,8 | 6,82 | 50 | 1,41 | 50 | 1 |
| LH25<br>0 | <i>L.hyperbo<br/>rea</i> | 26/10/2<br>022 | Korsfjorden, Bergen,<br>Hordaland | 60.157<br>397 | 5.0063<br>40 | K | 0-5 | 11,3 | 32 | 15,8 | 3,08 | 50 | 1,28 | 50 | 1 |

|           |                          |                |                                   |               |              |   |     |      |    |      |      |    |       |    |   |
|-----------|--------------------------|----------------|-----------------------------------|---------------|--------------|---|-----|------|----|------|------|----|-------|----|---|
| LH25<br>1 | <i>L.hyperbo<br/>rea</i> | 26/10/2<br>022 | Korsfjorden, Bergen,<br>Hordaland | 60.157<br>397 | 5.0063<br>40 | K | 0-5 | 11,3 | 32 | 25   | 6,06 | 50 | 3,94  | 50 | 1 |
| LH25<br>2 | <i>L.hyperbo<br/>rea</i> | 26/10/2<br>022 | Korsfjorden, Bergen,<br>Hordaland | 60.157<br>397 | 5.0063<br>40 | K | 0-5 | 11,3 | 32 | 27,5 | 5,66 | 50 | 5,8   | 50 | 1 |
| LH25<br>3 | <i>L.hyperbo<br/>rea</i> | 26/10/2<br>022 | Korsfjorden, Bergen,<br>Hordaland | 60.157<br>397 | 5.0063<br>40 | K | 0-5 | 11,3 | 32 | 17,6 | 3,3  | 50 | 1,8   | 50 | 1 |
| LH25<br>4 | <i>L.hyperbo<br/>rea</i> | 26/10/2<br>022 | Korsfjorden, Bergen,<br>Hordaland | 60.157<br>397 | 5.0063<br>40 | K | 0-5 | 11,3 | 32 | 21,6 | 2,28 | 50 | 1     | 50 | 1 |
| LH25<br>5 | <i>L.hyperbo<br/>rea</i> | 26/10/2<br>022 | Korsfjorden, Bergen,<br>Hordaland | 60.157<br>397 | 5.0063<br>40 | K | 0-5 | 11,3 | 32 | 18,5 | 3,9  | 50 | 1,7   | 50 | 1 |
| LH25<br>6 | <i>L.hyperbo<br/>rea</i> | 26/10/2<br>022 | Korsfjorden, Bergen,<br>Hordaland | 60.157<br>397 | 5.0063<br>40 | K | 0-5 | 11,3 | 32 | 40,2 | 11,6 | 50 | 4     | 50 | 1 |
| LH25<br>7 | <i>L.hyperbo<br/>rea</i> | 26/10/2<br>022 | Korsfjorden, Bergen,<br>Hordaland | 60.157<br>397 | 5.0063<br>40 | K | 0-5 | 11,3 | 32 | 27,2 | 3,94 | 50 | 1,68  | 50 | 1 |
| LH25<br>8 | <i>L.hyperbo<br/>rea</i> | 26/10/2<br>022 | Korsfjorden, Bergen,<br>Hordaland | 60.157<br>397 | 5.0063<br>40 | K | 0-5 | 11,3 | 32 | 28,6 | 6,72 | 50 | 2,44  | 50 | 1 |
| LH25<br>9 | <i>L.hyperbo<br/>rea</i> | 26/10/2<br>022 | Korsfjorden, Bergen,<br>Hordaland | 60.157<br>397 | 5.0063<br>40 | K | 0-5 | 11,3 | 32 | 26,8 | 5,4  | 50 | 1,15  | 50 | 1 |
| LH26<br>0 | <i>L.hyperbo<br/>rea</i> | 26/10/2<br>022 | Korsfjorden, Bergen,<br>Hordaland | 60.157<br>397 | 5.0063<br>40 | K | 0-5 | 11,3 | 32 | 22,1 | 2,92 | 50 | 0,606 | 50 | 1 |
| LH26<br>1 | <i>L.hyperbo<br/>rea</i> | 26/10/2<br>022 | Korsfjorden, Bergen,<br>Hordaland | 60.157<br>397 | 5.0063<br>40 | K | 0-5 | 11,3 | 32 | 23   | 2,28 | 50 | 0,688 | 50 | 1 |
| LH26<br>2 | <i>L.hyperbo<br/>rea</i> | 26/10/2<br>022 | Korsfjorden, Bergen,<br>Hordaland | 60.157<br>397 | 5.0063<br>40 | K | 0-5 | 11,3 | 32 | 24,1 | 2,34 | 50 | 0,396 | 50 | 1 |
| LH26<br>3 | <i>L.hyperbo<br/>rea</i> | 26/10/2<br>022 | Korsfjorden, Bergen,<br>Hordaland | 60.157<br>397 | 5.0063<br>40 | K | 0-5 | 11,3 | 32 | 40,4 | 3,54 | 50 | 1,27  | 50 | 1 |
| LH26<br>4 | <i>L.hyperbo<br/>rea</i> | 26/10/2<br>022 | Korsfjorden, Bergen,<br>Hordaland | 60.157<br>397 | 5.0063<br>40 | K | 0-5 | 11,3 | 32 | 53,5 | 6,46 | 50 | 3,44  | 50 | 1 |
| LH26<br>5 | <i>L.hyperbo<br/>rea</i> | 26/10/2<br>022 | Korsfjorden, Bergen,<br>Hordaland | 60.157<br>397 | 5.0063<br>40 | K | 0-5 | 11,3 | 32 | 42,8 | 3,8  | 50 | 3,44  | 50 | 1 |
| LH26<br>6 | <i>L.hyperbo<br/>rea</i> | 26/10/2<br>022 | Korsfjorden, Bergen,<br>Hordaland | 60.157<br>397 | 5.0063<br>40 | K | 0-5 | 11,3 | 32 | 30,7 | 17,3 | 50 | 5,54  | 50 | 1 |
| LH26<br>7 | <i>L.hyperbo<br/>rea</i> | 26/10/2<br>022 | Korsfjorden, Bergen,<br>Hordaland | 60.157<br>397 | 5.0063<br>40 | K | 0-5 | 11,3 | 32 | 36,2 | 2,74 | 50 | 4,24  | 50 | 1 |
| LH26<br>8 | <i>L.hyperbo<br/>rea</i> | 26/10/2<br>022 | Korsfjorden, Bergen,<br>Hordaland | 60.157<br>397 | 5.0063<br>40 | K | 0-5 | 11,3 | 32 | 27,8 | 3,06 | 50 | 3,4   | 50 | 1 |
| LH26<br>9 | <i>L.hyperbo<br/>rea</i> | 26/10/2<br>022 | Korsfjorden, Bergen,<br>Hordaland | 60.157<br>397 | 5.0063<br>40 | K | 0-5 | 11,3 | 32 | 41,2 | 2    | 50 | 0,332 | 50 | 1 |
| LH27<br>0 | <i>L.hyperbo<br/>rea</i> | 26/10/2<br>022 | Korsfjorden, Bergen,<br>Hordaland | 60.157<br>397 | 5.0063<br>40 | K | 0-5 | 11,3 | 32 | 36,2 | 2,26 | 50 | 0,794 | 50 | 1 |

Table S3: Sequencing samples information.

| Sample ID | Species             | Location          | Date       | Concentration ng/ul (50 ul) | ONT sequencing run ID | ONT sequencing barcode | # reads | # reads mapped vs NC_002687.1 (EsV-1) | # reads mapped vs NC_011183.1 (FsV-158) | # master Variants | A | B | C |
|-----------|---------------------|-------------------|------------|-----------------------------|-----------------------|------------------------|---------|---------------------------------------|-----------------------------------------|-------------------|---|---|---|
| SL65      | <i>S. Latissima</i> | Bergen            | 23.01.2022 | 17,9                        | 11OCT22-1             | 81                     | 2681    | 2                                     | 2                                       | 2                 | 1 | 0 | 1 |
| SL66      | <i>S. Latissima</i> | Bergen            | 23.01.2022 | 30                          | 11OCT22-1             | 82                     | 29963   | 916                                   | 53                                      | 3                 | 1 | 1 | 1 |
| SL68      | <i>S. Latissima</i> | Bergen            | 23.01.2022 | 17,4                        | 11OCT22-1             | 83                     | 21497   | 20                                    | 22                                      | 2                 | 1 | 0 | 1 |
| SL69      | <i>S. Latissima</i> | Bergen            | 23.01.2022 | 23,6                        | 11OCT22-1             | 84                     | 26069   | 0                                     | 164                                     | 2                 | 1 | 0 | 1 |
| SL74      | <i>S. Latissima</i> | Bergen            | 23.01.2022 | 20,2                        | 11OCT22-1             | 85                     | 7891    | 572                                   | 3                                       | 3                 | 1 | 1 | 1 |
| SL76      | <i>S. Latissima</i> | Bergen            | 23.01.2022 | 24,6                        | 11OCT22-1             | 86                     | 15833   | 144                                   | 6                                       | 3                 | 1 | 1 | 1 |
| SL78      | <i>S. Latissima</i> | Bergen            | 23.01.2022 | 37,2                        | 11OCT22-1             | 87                     | 17130   | 89                                    | 5                                       | 2                 | 1 | 0 | 1 |
| SL81      | <i>S. Latissima</i> | Bergen            | 23.01.2022 | 26,6                        | 11OCT22-1             | 88                     | 19349   | 709                                   | 0                                       | 3                 | 1 | 1 | 1 |
| SL91      | <i>S. Latissima</i> | Bergen            | 23.01.2022 | 23                          | 18JAN23DM1            | 1                      | 22859   | 44                                    | 9                                       | 3                 | 1 | 1 | 1 |
| SL96      | <i>S. Latissima</i> | Bergen            | 23.01.2022 | 21,8                        | 18JAN23DM1            | 2                      | 34060   | 77                                    | 99                                      | 1                 | 1 | 0 | 0 |
| SL97      | <i>S. Latissima</i> | Bergen            | 03.08.2022 | 51,2                        | 18JAN23DM1            | 3                      | 6839    | 1079                                  | 3                                       | 3                 | 1 | 1 | 1 |
| SL100     | <i>S. Latissima</i> | Bergen            | 03.08.2022 | 35                          | 18JAN23DM1            | 4                      | 9642    | 2808                                  | 35                                      | 3                 | 1 | 1 | 1 |
| SL104     | <i>S. Latissima</i> | Bergen            | 03.08.2022 | 29,4                        | 18JAN23DM1            | 5                      | 23853   | 378                                   | 3                                       | 3                 | 1 | 1 | 1 |
| SL108     | <i>S. Latissima</i> | Bergen            | 03.08.2022 | 23,6                        | 18JAN23DM1            | 6                      | 4331    | 0                                     | 177                                     | 2                 | 1 | 0 | 1 |
| SL111     | <i>S. Latissima</i> | Bergen            | 03.08.2022 | 32                          | 18JAN23DM1            | 7                      | 13712   | 167                                   | 3                                       | 3                 | 1 | 1 | 1 |
| SL112     | <i>S. Latissima</i> | Bergen            | 03.08.2022 | 28                          | 18JAN23DM1            | 8                      | 13175   | 2                                     | 0                                       | 2                 | 0 | 0 | 1 |
| SL116     | <i>S. Latissima</i> | Bergen            | 03.08.2022 | 24                          | 18JAN23DM1            | 9                      | 14813   | 1328                                  | 0                                       | 3                 | 1 | 1 | 1 |
| SL118     | <i>S. Latissima</i> | Bergen            | 03.08.2022 | 30,4                        | 18JAN23DM1            | 10                     | 273     | 0                                     | 0                                       |                   |   |   |   |
| SL128     | <i>S. Latissima</i> | Bergen            | 03.08.2022 | 27,4                        | 18JAN23DM1            | 11                     | 33680   | 196                                   | 12                                      | 3                 | 1 | 1 | 1 |
| LH139     | <i>L.hyperborea</i> | Bergen, Hordaland | 03.08.2022 | 66                          | 13JAN23DM1            | 17                     | 15486   | 4157                                  | 1287                                    | 2                 | 1 | 0 | 1 |
| LH119     | <i>L.hyperborea</i> | Bergen, Hordaland | 03.08.2022 | 52,2                        | 13JAN23DM1            | 18                     | 14153   | 501                                   | 2                                       | 3                 | 1 | 1 | 1 |
| LH178     | <i>L.hyperborea</i> | Bergen, Hordaland | 23.01.2022 | 36,8                        | 13JAN23DM1            | 25                     | 12257   | 3                                     | 0                                       | 2                 | 1 | 0 | 1 |
| LH177     | <i>L.hyperborea</i> | Bergen, Hordaland | 23.01.2022 | too high                    | 13JAN23DM1            | 26                     | 10691   | 2                                     | 0                                       | 2                 | 1 | 0 | 1 |
| LH173     | <i>L.hyperborea</i> | Bergen, Hordaland | 03.08.2022 | 73,6                        | 13JAN23DM1            | 27                     | 12000   | 253                                   | 7                                       | 2                 | 1 | 0 | 1 |
| LH170     | <i>L.hyperborea</i> | Bergen, Hordaland | 03.08.2022 | 57,4                        | 13JAN23DM1            | 28                     | 12536   | 2                                     | 3                                       | 2                 | 1 | 0 | 1 |
| LH157     | <i>L.hyperborea</i> | Bergen, Hordaland | 03.08.2022 | 48,2                        | 13JAN23DM1            | 29                     | 2952    | 3                                     | 2                                       | 2                 | 1 | 0 | 1 |

|       |                     |                   |            |      |            |    |       |      |     |   |   |   |   |
|-------|---------------------|-------------------|------------|------|------------|----|-------|------|-----|---|---|---|---|
| LH148 | <i>L.hyperborea</i> | Bergen, Hordaland | 03.08.2022 | 49   | 13JAN23DM1 | 30 | 10081 | 3    | 2   | 2 | 1 | 0 | 1 |
| LH143 | <i>L.hyperborea</i> | Bergen, Hordaland | 03.08.2022 | 48,4 | 13JAN23DM1 | 31 | 5596  | 2    | 0   | 2 | 1 | 0 | 1 |
| LH142 | <i>L.hyperborea</i> | Bergen, Hordaland | 03.08.2022 | 60,2 | 13JAN23DM1 | 32 | 10598 | 0    | 7   | 2 | 1 | 0 | 1 |
| LH185 | <i>L.hyperborea</i> | Bergen, Hordaland | 03.08.2022 | 74,8 | 13JAN23DM1 | 33 | 1305  | 248  | 35  | 2 | 0 | 1 | 1 |
| LH182 | <i>L.hyperborea</i> | Bergen, Hordaland | 03.08.2022 | 73,2 | 13JAN23DM1 | 34 | 4202  | 714  | 291 | 2 | 0 | 1 | 1 |
| LH181 | <i>L.hyperborea</i> | Bergen, Hordaland | 03.08.2022 | 54   | 13JAN23DM1 | 35 | 9914  | 851  | 2   | 3 | 1 | 1 | 1 |
| LH179 | <i>L.hyperborea</i> | Bergen, Hordaland | 23.01.2022 | 49,4 | 13JAN23DM1 | 36 | 9399  | 4    | 0   | 2 | 1 | 0 | 1 |
| LH193 | <i>L.hyperborea</i> | Bergen, Hordaland | 03.08.2022 | 49,6 | 13JAN23DM1 | 38 | 15586 | 326  | 0   | 2 | 1 | 0 | 1 |
| LH189 | <i>L.hyperborea</i> | Bergen, Hordaland | 03.08.2022 | 49   | 13JAN23DM1 | 40 | 9720  | 3    | 0   | 2 | 1 | 0 | 1 |
| LH224 | <i>L.hyperborea</i> | Bergen, Hordaland | 15.06.2022 | 16,3 | 13JAN23DM1 | 41 | 3918  | 59   | 0   | 2 | 1 | 0 | 1 |
| LH207 | <i>L.hyperborea</i> | Bergen, Hordaland | 23.01.2022 | 24,8 | 13JAN23DM1 | 42 | 5841  | 0    | 0   | 2 | 1 | 0 | 1 |
| LH205 | <i>L.hyperborea</i> | Bergen, Hordaland | 23.01.2022 | 17   | 13JAN23DM1 | 43 | 13568 | 6    | 0   | 2 | 1 | 0 | 1 |
| LH204 | <i>L.hyperborea</i> | Bergen, Hordaland | 23.01.2022 | 58,6 | 13JAN23DM1 | 44 | 10792 | 3    | 0   | 3 | 1 | 1 | 1 |
| LH202 | <i>L.hyperborea</i> | Bergen, Hordaland | 23.01.2022 | 27   | 13JAN23DM1 | 45 | 13882 | 3    | 0   | 2 | 1 | 0 | 1 |
| LH201 | <i>L.hyperborea</i> | Bergen, Hordaland | 23.01.2022 | 23,8 | 13JAN23DM1 | 46 | 16305 | 5    | 11  | 3 | 1 | 1 | 1 |
| LH199 | <i>L.hyperborea</i> | Bergen, Hordaland | 03.08.2022 | 64,2 | 13JAN23DM1 | 47 | 9199  | 3    | 29  | 2 | 1 | 0 | 1 |
| LH195 | <i>L.hyperborea</i> | Bergen, Hordaland | 03.08.2022 | 93,6 | 13JAN23DM1 | 48 | 10809 | 317  | 180 | 2 | 1 | 0 | 1 |
| LH255 | <i>L.hyperborea</i> | Bergen, Hordaland | 26.10.2022 | 3,9  | 13JAN23DM1 | 49 | 9691  | 1507 | 2   | 3 | 1 | 1 | 1 |
| LH252 | <i>L.hyperborea</i> | Bergen, Hordaland | 26.10.2022 | 5,66 | 13JAN23DM1 | 50 | 13567 | 1574 | 58  | 3 | 1 | 1 | 1 |
| LH251 | <i>L.hyperborea</i> | Bergen, Hordaland | 26.10.2022 | 6,06 | 13JAN23DM1 | 51 | 13169 | 832  | 3   | 3 | 1 | 1 | 1 |
| LH249 | <i>L.hyperborea</i> | Bergen, Hordaland | 26.10.2022 | 6,82 | 13JAN23DM1 | 52 | 15446 | 2752 | 0   | 3 | 1 | 1 | 1 |
| LH240 | <i>L.hyperborea</i> | Bergen, Hordaland | 15.06.2022 | 17,1 | 13JAN23DM1 | 53 | 6284  | 1754 | 0   | 2 | 0 | 1 | 1 |
| LH239 | <i>L.hyperborea</i> | Bergen, Hordaland | 15.06.2022 | 16   | 13JAN23DM1 | 54 | 11612 | 2578 | 0   | 2 | 0 | 1 | 1 |
| LH237 | <i>L.hyperborea</i> | Bergen, Hordaland | 15.06.2022 | 13,8 | 13JAN23DM1 | 55 | 9563  | 1886 | 0   | 2 | 0 | 1 | 1 |
| LH225 | <i>L.hyperborea</i> | Bergen, Hordaland | 15.06.2022 | 18   | 13JAN23DM1 | 56 | 17469 | 4256 | 46  | 2 | 0 | 1 | 1 |
| LH259 | <i>L.hyperborea</i> | Bergen, Hordaland | 26.10.2022 | 5,4  | 13JAN23DM1 | 57 | 4452  | 243  | 4   | 3 | 1 | 1 | 1 |
| LH258 | <i>L.hyperborea</i> | Bergen, Hordaland | 26.10.2022 | 6,72 | 13JAN23DM1 | 58 | 6481  | 504  | 6   | 3 | 1 | 1 | 1 |
| LH257 | <i>L.hyperborea</i> | Bergen, Hordaland | 26.10.2022 | 3,94 | 13JAN23DM1 | 59 | 7501  | 635  | 0   | 3 | 1 | 1 | 1 |
| LH256 | <i>L.hyperborea</i> | Bergen, Hordaland | 26.10.2022 | 11,6 | 13JAN23DM1 | 60 | 9705  | 983  | 2   | 3 | 1 | 1 | 1 |
| LH266 | <i>L.hyperborea</i> | Bergen, Hordaland | 26.10.2022 | 17,3 | 13JAN23DM1 | 63 | 17678 | 2503 | 22  | 3 | 1 | 1 | 1 |
| LH264 | <i>L.hyperborea</i> | Bergen, Hordaland | 26.10.2022 | 6,46 | 13JAN23DM1 | 64 | 9824  | 2732 | 14  | 3 | 1 | 1 | 1 |
| LH163 | <i>L.hyperborea</i> | Bergen, Hordaland | 03.08.2022 | 45,8 | 18JAN23DM1 | 17 | 8904  | 67   | 0   | 3 | 1 | 1 | 1 |
| LH164 | <i>L.hyperborea</i> | Bergen, Hordaland | 03.08.2022 | 68,6 | 18JAN23DM1 | 18 | 4245  | 2    | 0   | 2 | 1 | 0 | 1 |

|       |                      |                              |            |      |            |    |       |      |    |   |   |   |   |
|-------|----------------------|------------------------------|------------|------|------------|----|-------|------|----|---|---|---|---|
| SL330 | <i>S. Latissima</i>  | Bergen, Hordaland            | 15.06.2022 | 12,8 | 18JAN23DM1 | 34 | 15957 | 275  | 4  | 2 | 1 | 0 | 1 |
| SL331 | <i>S. Latissima</i>  | Bergen, Hordaland            | 15.06.2022 | 16,3 | 18JAN23DM1 | 35 | 22350 | 7283 | 73 | 3 | 1 | 1 | 1 |
| SL333 | <i>S. Latissima</i>  | Bergen, Hordaland            | 15.06.2022 | 15,8 | 18JAN23DM1 | 36 | 13218 | 3697 | 3  | 3 | 1 | 1 | 1 |
| SL334 | <i>S. Latissima</i>  | Bergen, Hordaland            | 15.06.2022 | 24,4 | 18JAN23DM1 | 37 | 14575 | 189  | 4  | 3 | 1 | 1 | 1 |
| SL336 | <i>S. Latissima</i>  | Bergen, Hordaland            | 15.06.2022 | 22,2 | 18JAN23DM1 | 38 | 12466 | 7305 | 0  | 3 | 1 | 1 | 1 |
| SL339 | <i>S. Latissima</i>  | Bergen, Hordaland            | 15.06.2022 | 22,8 | 18JAN23DM1 | 39 | 4423  | 2941 | 36 | 2 | 0 | 1 | 1 |
| SL340 | <i>S. Latissima</i>  | Bergen, Hordaland            | 15.06.2022 | 23,4 | 18JAN23DM1 | 40 | 8842  | 148  | 0  | 2 | 0 | 1 | 1 |
| SL344 | <i>S. Latissima</i>  | Bergen, Hordaland            | 15.06.2022 | 15,3 | 18JAN23DM1 | 41 | 9598  | 774  | 4  | 3 | 1 | 1 | 1 |
| SL347 | <i>S. Latissima</i>  | Bergen, Hordaland            | 15.06.2022 | 26   | 18JAN23DM1 | 42 | 5535  | 122  | 0  | 2 | 0 | 1 | 1 |
| SL350 | <i>S. Latissima</i>  | Bergen, Hordaland            | 15.06.2022 | 8,88 | 18JAN23DM1 | 43 | 11840 | 5    | 0  | 2 | 1 | 0 | 1 |
| SL353 | <i>S. Latissima</i>  | Bergen, Hordaland            | 26.10.2022 | 6,96 | 18JAN23DM1 | 44 | 7476  | 764  | 12 | 2 | 0 | 1 | 1 |
| SL354 | <i>S. Latissima</i>  | Bergen, Hordaland            | 26.10.2022 | 8,3  | 18JAN23DM1 | 45 | 5990  | 2    | 2  | 2 | 1 | 0 | 1 |
| SL356 | <i>S. Latissima</i>  | Bergen, Hordaland            | 26.10.2022 | 14,4 | 18JAN23DM1 | 46 | 12992 | 540  | 18 | 3 | 1 | 1 | 1 |
| SL360 | <i>S. Latissima</i>  | Bergen, Hordaland            | 26.10.2022 | 7,7  | 18JAN23DM1 | 47 | 10954 | 2    | 62 | 2 | 1 | 0 | 1 |
| SL361 | <i>S. Latissima</i>  | Bergen, Hordaland            | 26.10.2022 | 21,2 | 18JAN23DM1 | 48 | 1201  | 0    | 0  |   |   |   |   |
| SL364 | <i>S. Latissima</i>  | Bergen, Hordaland            | 26.10.2022 | 9,68 | 18JAN23DM1 | 49 | 307   | 32   | 5  | 2 | 1 | 0 | 1 |
| SL365 | <i>S. Latissima</i>  | Bergen, Hordaland            | 26.10.2022 | 12,9 | 18JAN23DM1 | 50 | 7001  | 4    | 0  | 2 | 1 | 0 | 1 |
| SL368 | <i>S. Latissima</i>  | Bergen, Hordaland            | 26.10.2022 | 9,76 | 18JAN23DM1 | 51 | 10693 | 6    | 5  | 2 | 1 | 0 | 1 |
| SL370 | <i>S. Latissima</i>  | Bergen, Hordaland            | 26.10.2022 | 13,4 | 18JAN23DM1 | 52 | 1253  | 391  | 0  | 2 | 0 | 1 | 1 |
| SL371 | <i>S. Latissima</i>  | Bergen, Hordaland            | 26.10.2022 | 12,3 | 18JAN23DM1 | 53 | 5326  | 172  | 4  | 3 | 1 | 1 | 1 |
| LH66  | <i>L. hyperborea</i> | Bona Sea Rogaland            | 27.07.2021 | 10,4 | 11OCT22-1  | 65 | 27661 | 5321 | 3  | 2 | 0 | 1 | 1 |
| LH69  | <i>L. hyperborea</i> | Bona Sea Rogaland            | 27.07.2021 | 11,9 | 13JAN23DM1 | 1  | 10947 | 2    | 86 | 1 | 0 | 0 | 1 |
| LH67  | <i>L. hyperborea</i> | Bona Sea Rogaland            | 27.07.2021 | 11,6 | 13JAN23DM1 | 2  | 6685  | 4    | 0  |   |   |   |   |
| LH60  | <i>L. hyperborea</i> | Bona Sea Rogaland            | 27.07.2021 | 15,2 | 13JAN23DM1 | 3  | 6573  | 88   | 2  | 3 | 1 | 1 | 1 |
| LH56  | <i>L. hyperborea</i> | Bona Sea Rogaland            | 27.07.2021 | 10,4 | 13JAN23DM1 | 4  | 5075  | 3    | 0  |   |   |   |   |
| LH55  | <i>L. hyperborea</i> | Bona Sea Rogaland            | 27.07.2021 | 19,7 | 13JAN23DM1 | 5  | 8096  | 2    | 0  | 1 | 1 | 0 | 0 |
| LH75  | <i>L. hyperborea</i> | Bona Sea Rogaland            | 27.07.2021 | 10,9 | 13JAN23DM1 | 9  | 4498  | 2    | 0  | 2 | 1 | 0 | 1 |
| LH74  | <i>L. hyperborea</i> | Bona Sea Rogaland            | 27.07.2021 | 10,1 | 13JAN23DM1 | 10 | 3346  | 3    | 0  | 1 | 0 | 1 | 0 |
| LH72  | <i>L. hyperborea</i> | Bona Sea Rogaland            | 27.07.2021 | 14,5 | 13JAN23DM1 | 11 | 6764  | 2    | 2  |   |   |   |   |
| LH70  | <i>L. hyperborea</i> | Bona Sea Rogaland            | 27.07.2021 | 10,2 | 13JAN23DM1 | 12 | 10461 | 3    | 0  | 2 | 1 | 0 | 1 |
| K2    | <i>S. latissima</i>  | Bud, Jøssingfjor, Vest-Agder | 25.07.2016 | 7,8  | 02NOV22_1  | 1  | 63    | 0    | 0  |   |   |   |   |
| K3    | <i>S. latissima</i>  | Bud, Jøssingfjor, Vest-Agder | 25.07.2016 | 12,5 | 02NOV22_1  | 2  | 5809  | 1500 | 22 | 3 | 1 | 1 | 1 |
| K4    | <i>S. latissima</i>  | Bud, Jøssingfjor, Vest-Agder | 25.07.2016 | 7,3  | 02NOV22_1  | 3  | 1492  | 543  | 0  | 2 | 0 | 1 | 1 |

|       |                     |                          |            |      |            |    |       |      |    |   |   |   |   |
|-------|---------------------|--------------------------|------------|------|------------|----|-------|------|----|---|---|---|---|
| SL257 | <i>S. Latissima</i> | Båthavn v/Karmsund Bro   | 25.03.2022 | 33,8 | 18JAN23DM1 | 24 | 30764 | 2102 | 3  | 2 | 0 | 1 | 1 |
| SL263 | <i>S. Latissima</i> | Båthavn v/Karmsund Bro   | 25.03.2022 | 45   | 18JAN23DM1 | 25 | 9351  | 436  | 5  | 2 | 0 | 1 | 1 |
| SL272 | <i>S. Latissima</i> | Båthavn v/Karmsund Bro   | 25.03.2022 | 38,8 | 18JAN23DM1 | 26 | 16572 | 1786 | 13 | 3 | 1 | 1 | 1 |
| SL283 | <i>S. Latissima</i> | Båthavn v/Karmsund Bro   | 25.03.2022 | 33,2 | 18JAN23DM1 | 27 | 5098  | 1121 | 0  | 2 | 0 | 1 | 1 |
| K75   | <i>S. latissima</i> | Frøya, Sør-Trøndelag     | 26.01.2017 | 8,6  | 02NOV22_1  | 17 | 1541  | 0    | 0  | 1 | 1 | 0 | 0 |
| K77   | <i>S. latissima</i> | Frøya, Sør-Trøndelag     | 26.01.2017 | 16   | 02NOV22_1  | 18 | 472   | 0    | 0  | 2 | 1 | 0 | 1 |
| K79   | <i>S. latissima</i> | Frøya, Sør-Trøndelag     | 26.01.2017 | 17,1 | 02NOV22_1  | 19 | 490   | 0    | 0  | 2 | 1 | 0 | 1 |
| K183  | <i>S. latissima</i> | Hardangerfjord           | 08.08.2017 | 9,96 | 02NOV22_1  | 33 | 50    | 0    | 0  |   |   |   |   |
| K184  | <i>S. latissima</i> | Hardangerfjord           | 08.08.2017 | 17,5 | 02NOV22_1  | 34 | 451   | 0    | 0  |   |   |   |   |
| K186  | <i>S. latissima</i> | Hardangerfjord           | 08.08.2017 | 9,48 | 02NOV22_1  | 35 | 851   | 2    | 0  | 1 | 1 | 0 | 0 |
| K190  | <i>S. latissima</i> | Hardangerfjord           | 08.08.2017 | 7,76 | 02NOV22_1  | 38 | 3711  | 243  | 0  | 2 | 0 | 1 | 1 |
| K191  | <i>S. latissima</i> | Hardangerfjord           | 08.08.2017 | 5,84 | 02NOV22_1  | 39 | 1006  | 91   | 0  | 2 | 0 | 1 | 1 |
| K188  | <i>S. latissima</i> | Hardangerfjord           | 08.08.2017 | 17,7 | 13JAN23DM1 | 65 | 226   | 0    | 0  | 2 | 1 | 0 | 1 |
| SL135 | <i>S. Latissima</i> | Haugesund, Rogaland      | 02.11.2022 | 83,6 | 18JAN23DM1 | 12 | 10589 | 361  | 0  | 2 | 0 | 1 | 1 |
| SL139 | <i>S. Latissima</i> | Haugesund, Rogaland      | 02.11.2022 | 102  | 18JAN23DM1 | 13 | 8790  | 2895 | 0  | 2 | 0 | 1 | 1 |
| SL149 | <i>S. Latissima</i> | Haugesund, Rogaland      | 02.11.2022 | 108  | 18JAN23DM1 | 14 | 4001  | 885  | 0  | 3 | 1 | 1 | 1 |
| SL151 | <i>S. Latissima</i> | Haugesund, Rogaland      | 02.11.2022 | 100  | 18JAN23DM1 | 15 | 14333 | 271  | 0  | 2 | 0 | 1 | 1 |
| SL153 | <i>S. Latissima</i> | Haugesund, Rogaland      | 02.11.2022 | 76,8 | 18JAN23DM1 | 16 | 4903  | 641  | 7  | 3 | 1 | 1 | 1 |
| SL248 | <i>S. Latissima</i> | Haugesund, Rogaland      | 02.11.2022 | 118  | 18JAN23DM1 | 23 | 10804 | 2304 | 0  | 3 | 1 | 1 | 1 |
| K7    | <i>S. latissima</i> | Kalak, Lebesby, Finnmark | 18.12.2016 | 5    | 02NOV22_1  | 4  | 3501  | 1464 | 44 | 2 | 0 | 1 | 1 |
| SL182 | <i>S. Latissima</i> | Karmøy, Rogaland         | 02.11.2022 | 72,6 | 18JAN23DM1 | 19 | 1801  | 51   | 2  | 3 | 1 | 1 | 1 |
| SL185 | <i>S. Latissima</i> | Karmøy, Rogaland         | 02.11.2022 | 106  | 18JAN23DM1 | 20 | 9720  | 360  | 0  | 2 | 0 | 1 | 1 |
| SL196 | <i>S. Latissima</i> | Karmøy, Rogaland         | 02.11.2022 | 73   | 18JAN23DM1 | 22 | 5022  | 913  | 0  | 3 | 1 | 1 | 1 |
| K82   | <i>S. latissima</i> | Korsfjorden, Hordaland   | 30.03.2017 | 16,1 | 02NOV22_1  | 20 | 1430  | 178  | 0  | 3 | 1 | 1 | 1 |
| K85   | <i>S. latissima</i> | Korsfjorden, Hordaland   | 30.03.2017 | 21,2 | 02NOV22_1  | 22 | 178   | 3    | 0  | 1 | 0 | 1 | 0 |
| K87   | <i>S. latissima</i> | Korsfjorden, Hordaland   | 30.03.2017 | 17,5 | 02NOV22_1  | 23 | 745   | 2    | 0  | 2 | 1 | 0 | 1 |
| K88   | <i>S. latissima</i> | Korsfjorden, Hordaland   | 30.03.2017 | 11,7 | 02NOV22_1  | 24 | 1401  | 0    | 0  | 2 | 1 | 0 | 1 |
| K90   | <i>S. latissima</i> | Korsfjorden, Hordaland   | 30.03.2017 | 14   | 02NOV22_1  | 25 | 349   | 19   | 0  | 2 | 0 | 1 | 1 |
| K91   | <i>S. latissima</i> | Korsfjorden, Hordaland   | 30.03.2017 | 11   | 02NOV22_1  | 26 | 161   | 2    | 0  | 1 | 0 | 0 | 1 |
| K92   | <i>S. latissima</i> | Korsfjorden, Hordaland   | 30.03.2017 | 12,4 | 02NOV22_1  | 27 | 1780  | 448  | 0  | 2 | 0 | 1 | 1 |
| K95   | <i>S. latissima</i> | Korsfjorden, Hordaland   | 30.03.2017 | 4,4  | 02NOV22_1  | 28 | 1578  | 305  | 0  | 2 | 0 | 1 | 1 |
| K78   | <i>S. latissima</i> | Korsfjorden, Hordaland   | 30.03.2017 | 8,6  | 02NOV22_1  | 29 | 256   | 0    | 0  |   |   |   |   |
| K50   | <i>S. latissima</i> | Krøttøy, Troms           | 27.07.2016 | 24   | 02NOV22_1  | 14 | 1862  | 130  | 2  | 3 | 1 | 1 | 1 |

|       |                     |                               |            |      |            |    |       |      |    |   |   |   |   |
|-------|---------------------|-------------------------------|------------|------|------------|----|-------|------|----|---|---|---|---|
| SL190 | <i>S. Latissima</i> | Kvalsvik, Haugesund, Rogaland | 02.11.2022 | 76,2 | 18JAN23DM1 | 21 | 638   | 41   | 0  | 2 | 0 | 1 | 1 |
| K19   | <i>S.latissima</i>  | Kvam, Hardangerfjord          | 15.02.2016 | 7    | 02NOV22_1  | 21 | 2004  | 167  | 14 | 3 | 1 | 1 | 1 |
| K21   | <i>S.latissima</i>  | Kvam, Hardangerfjord          | 15.02.2016 | 5,6  | 13JAN23DM1 | 61 | 358   | 3    | 0  |   |   |   |   |
| K20   | <i>S.latissima</i>  | Kvam, Hardangerfjord          | 15.02.2016 | 9    | 13JAN23DM1 | 62 | 225   | 4    | 0  |   |   |   |   |
| K22   | <i>S.latissima</i>  | Kvam, Hardangerfjord          | 15.02.2016 | 6,7  | 13JAN23DM1 | 68 | 5543  | 945  | 2  | 2 | 1 | 0 | 1 |
| LH101 | <i>L.hyperborea</i> | Møre & Romsdal                | 27.07.2021 | 14,5 | 13JAN23DM1 | 13 | 11914 | 400  | 0  | 3 | 1 | 1 | 1 |
| LH100 | <i>L.hyperborea</i> | Møre & Romsdal                | 27.07.2021 | 13   | 13JAN23DM1 | 14 | 5195  | 23   | 0  | 2 | 1 | 0 | 1 |
| LH95  | <i>L.hyperborea</i> | Møre & Romsdal                | 27.07.2021 | 11   | 13JAN23DM1 | 15 | 8485  | 2169 | 0  | 3 | 1 | 1 | 1 |
| LH78  | <i>L.hyperborea</i> | Møre & Romsdal                | 27.07.2021 | 11,3 | 13JAN23DM1 | 16 | 20624 | 7994 | 4  | 3 | 1 | 1 | 1 |
| LH116 | <i>L.hyperborea</i> | Møre & Romsdal                | 27.07.2021 | 12,2 | 13JAN23DM1 | 19 | 21770 | 8025 | 41 | 2 | 0 | 1 | 1 |
| LH112 | <i>L.hyperborea</i> | Møre & Romsdal                | 27.07.2021 | 15,2 | 13JAN23DM1 | 20 | 11473 | 837  | 3  | 3 | 1 | 1 | 1 |
| LH108 | <i>L.hyperborea</i> | Møre & Romsdal                | 27.07.2021 | 12,7 | 13JAN23DM1 | 21 | 9879  | 1988 | 11 | 3 | 1 | 1 | 1 |
| LH107 | <i>L.hyperborea</i> | Møre & Romsdal                | 27.07.2021 | 25   | 13JAN23DM1 | 22 | 14369 | 3946 | 16 | 2 | 0 | 1 | 1 |
| LH104 | <i>L.hyperborea</i> | Møre & Romsdal                | 27.07.2021 | 15,5 | 13JAN23DM1 | 23 | 9457  | 3    | 0  | 1 | 1 | 0 | 0 |
| LH103 | <i>L.hyperborea</i> | Møre & Romsdal                | 27.07.2021 | 17   | 13JAN23DM1 | 24 | 6568  | 58   | 87 | 3 | 1 | 1 | 1 |
| K28   | <i>S.latissima</i>  | Porsanger, Finmark            | 08.03.2016 | 4,5  | 02NOV22_1  | 10 | 1876  | 551  | 16 | 2 | 0 | 1 | 1 |
| K30   | <i>S.latissima</i>  | Porsanger, Finmark            | 08.03.2016 | 5,6  | 02NOV22_1  | 11 | 2069  | 40   | 2  | 3 | 1 | 1 | 1 |
| K145  | <i>S.latissima</i>  | Sognefjord                    | 27.04.2017 | 15,3 | 02NOV22_1  | 30 | 2207  | 497  | 0  | 3 | 1 | 1 | 1 |
| K108  | <i>S.latissima</i>  | Sognefjord                    | 25.04.2017 | 20   | 02NOV22_1  | 31 | 2345  | 32   | 2  | 3 | 1 | 1 | 1 |
| K170  | <i>S.latissima</i>  | Sognefjord                    | 28.04.2017 | 20   | 02NOV22_1  | 32 | 2485  | 2    | 2  | 1 | 1 | 0 | 0 |
| K178  | <i>S.latissima</i>  | Sognefjord                    | 28.04.2017 | 15,5 | 02NOV22_1  | 36 | 1478  | 0    | 0  | 2 | 1 | 0 | 1 |
| K179  | <i>S.latissima</i>  | Sognefjord                    | 28.04.2017 | 20,8 | 02NOV22_1  | 37 | 58    | 0    | 0  |   |   |   |   |
| K172  | <i>S.latissima</i>  | Sognefjord                    | 28.04.2017 | 23,2 | 02NOV22_1  | 40 | 2165  | 48   | 0  | 2 | 0 | 1 | 1 |
| K173  | <i>S.latissima</i>  | Sognefjord                    | 28.04.2017 | 18,6 | 02NOV22_1  | 41 | 2282  | 90   | 0  | 2 | 0 | 1 | 1 |
| K175  | <i>S.latissima</i>  | Sognefjord                    | 28.04.2017 | 18,6 | 02NOV22_1  | 42 | 677   | 130  | 0  | 2 | 0 | 1 | 1 |
| K180  | <i>S.latissima</i>  | Sognefjord                    | 28.04.2017 | 19,3 | 13JAN23DM1 | 66 | 3334  | 0    | 2  | 3 | 1 | 1 | 1 |
| K166  | <i>S.latissima</i>  | Sognefjord                    | ?          | 20   | 13JAN23DM1 | 67 | 6916  | 54   | 0  | 3 | 1 | 1 | 1 |
| K41   | <i>S.latissima</i>  | Sommarøy, Troms               | 08.12.2016 | 6,1  | 02NOV22_1  | 12 | 51    | 0    | 0  |   |   |   |   |
| K44   | <i>S.latissima</i>  | Sommarøy, Troms               | 08.12.2016 | 13,2 | 02NOV22_1  | 13 | 204   | 20   | 0  | 2 | 0 | 1 | 1 |
| SL291 | <i>S. Latissima</i> | Størøy, Haugesund             | 25.03.2022 | 36,4 | 18JAN23DM1 | 28 | 18601 | 4644 | 0  | 3 | 1 | 1 | 1 |
| SL295 | <i>S. Latissima</i> | Størøy, Haugesund             | 25.03.2022 | 88,2 | 18JAN23DM1 | 29 | 2375  | 127  | 0  | 2 | 0 | 1 | 1 |
| SL306 | <i>S. Latissima</i> | Størøy, Haugesund             | 25.03.2022 | 43,6 | 18JAN23DM1 | 30 | 21457 | 1185 | 0  | 3 | 1 | 1 | 1 |
| SL307 | <i>S. Latissima</i> | Størøy, Haugesund             | 25.03.2022 | 32,2 | 18JAN23DM1 | 31 | 17985 | 4600 | 11 | 3 | 1 | 1 | 1 |

|       |                      |                       |            |      |            |    |       |       |     |   |   |   |   |
|-------|----------------------|-----------------------|------------|------|------------|----|-------|-------|-----|---|---|---|---|
| SL310 | <i>S. latissima</i>  | Størøy, Haugesund     | 25.03.2022 | 51,6 | 18JAN23DM1 | 32 | 18128 | 3507  | 19  | 3 | 1 | 1 | 1 |
| SL327 | <i>S. latissima</i>  | Størøy, Haugesund     | 25.03.2022 | 33,4 | 18JAN23DM1 | 33 | 15070 | 1027  | 5   | 3 | 1 | 1 | 1 |
| K10   | <i>S. latissima</i>  | Søgne, Vest-Agder     | 13.12.2016 | 9,7  | 02NOV22_1  | 5  | 3534  | 1077  | 50  | 2 | 0 | 1 | 1 |
| K11   | <i>S. latissima</i>  | Søgne, Vest-Agder     | 13.12.2016 | 6,7  | 02NOV22_1  | 6  | 5617  | 1383  | 70  | 3 | 1 | 1 | 1 |
| K12   | <i>S. latissima</i>  | Søgne, Vest-Agder     | 13.12.2016 | 6,3  | 02NOV22_1  | 7  | 3088  | 916   | 35  | 3 | 1 | 1 | 1 |
| K15   | <i>S. latissima</i>  | Søgne, Vest-Agder     | 13.12.2016 | 13   | 02NOV22_1  | 8  | 1632  | 813   | 0   | 2 | 0 | 1 | 1 |
| K16   | <i>S. latissima</i>  | Søgne, Vest-Agder     | 13.12.2016 | 10,5 | 02NOV22_1  | 9  | 3247  | 125   | 111 | 2 | 1 | 0 | 1 |
| SL17  | <i>S. latissima</i>  | Trollsøy, Austevoll   | 05.04.2021 | 20,6 | 02NOV22_1  | 43 | 1276  | 117   | 0   | 2 | 0 | 1 | 1 |
| SL26  | <i>S. latissima</i>  | Trollsøy, Austevoll   | 05.04.2021 | 5,58 | 02NOV22_1  | 44 | 2854  | 53    | 0   | 3 | 1 | 1 | 1 |
| SL29  | <i>S. latissima</i>  | Trollsøy, Austevoll   | 05.04.2021 | 6,62 | 02NOV22_1  | 45 | 2700  | 30    | 0   | 3 | 1 | 1 | 1 |
| SL30  | <i>S. latissima</i>  | Trollsøy, Austevoll   | 05.04.2021 | 6,56 | 02NOV22_1  | 46 | 3310  | 50    | 0   | 2 | 1 | 1 | 0 |
| SL32  | <i>S. latissima</i>  | Trollsøy, Austevoll   | 05.04.2021 | 4,98 | 11OCT22-1  | 73 | 41632 | 365   | 3   | 3 | 1 | 1 | 1 |
| SL33  | <i>S. latissima</i>  | Trollsøy, Austevoll   | 05.04.2021 | 6,66 | 11OCT22-1  | 74 | 30471 | 362   | 3   | 3 | 1 | 1 | 1 |
| SL34  | <i>S. latissima</i>  | Trollsøy, Austevoll   | 05.04.2021 | 7,32 | 11OCT22-1  | 75 | 14656 | 125   | 3   | 3 | 1 | 1 | 1 |
| SL35  | <i>S. latissima</i>  | Trollsøy, Austevoll   | 05.04.2021 | 3,66 | 11OCT22-1  | 76 | 1228  | 0     | 0   | 2 | 1 | 0 | 1 |
| SL49  | <i>S. latissima</i>  | Trollsøy, Austevoll   | 05.04.2021 | 7,38 | 11OCT22-1  | 77 | 17721 | 145   | 0   | 3 | 1 | 1 | 1 |
| SL54  | <i>S. latissima</i>  | Trollsøy, Austevoll   | 05.04.2021 | 12,6 | 11OCT22-1  | 78 | 15259 | 203   | 5   | 3 | 1 | 1 | 1 |
| K59   | <i>S. latissima</i>  | Vengsøya, Troms       | 01.09.2017 | 4,4  | 02NOV22_1  | 15 | 1605  | 471   | 5   | 2 | 0 | 1 | 1 |
| K63   | <i>S. latissima</i>  | Vengsøya, Troms       | 01.09.2017 | 2,2  | 02NOV22_1  | 16 | 2254  | 484   | 0   | 2 | 0 | 1 | 1 |
| LH23  | <i>L. hyperborea</i> | Vikna, Nord-Trøndelag | 16.06.2021 | 14,4 | 11OCT22-1  | 66 | 14235 | 3     | 7   | 2 | 1 | 0 | 1 |
| LH28  | <i>L. hyperborea</i> | Vikna, Nord-Trøndelag | 16.06.2021 | 14,4 | 11OCT22-1  | 67 | 9839  | 0     | 2   | 1 | 0 | 1 | 0 |
| LH29  | <i>L. hyperborea</i> | Vikna, Nord-Trøndelag | 16.06.2021 | 14,3 | 11OCT22-1  | 68 | 3893  | 991   | 0   | 2 | 0 | 1 | 1 |
| LH36  | <i>L. hyperborea</i> | Vikna, Nord-Trøndelag | 16.06.2021 | 15,6 | 11OCT22-1  | 69 | 26837 | 6145  | 86  | 3 | 1 | 1 | 1 |
| LH17  | <i>L. hyperborea</i> | Vikna, Nord-Trøndelag | 16.06.2021 | 15,2 | 11OCT22-1  | 70 | 58514 | 15825 | 333 | 2 | 0 | 1 | 1 |
| LH14  | <i>L. hyperborea</i> | Vikna, Nord-Trøndelag | 16.06.2021 | 14,5 | 11OCT22-1  | 79 | 39044 | 8138  | 16  | 3 | 1 | 1 | 1 |
| LH15  | <i>L. hyperborea</i> | Vikna, Nord-Trøndelag | 16.06.2021 | 17,1 | 11OCT22-1  | 80 | 15437 | 962   | 0   | 2 | 0 | 1 | 1 |
| LH33  | <i>L. hyperborea</i> | Vikna, Nord-Trøndelag | 16.06.2021 | 14,1 | 13JAN23DM1 | 6  | 1745  | 3     | 0   | 1 | 0 | 1 | 0 |
| LH22  | <i>L. hyperborea</i> | Vikna, Nord-Trøndelag | 16.06.2021 | 16,3 | 13JAN23DM1 | 7  | 10096 | 2409  | 2   | 3 | 1 | 1 | 1 |
| LH20  | <i>L. hyperborea</i> | Vikna, Nord-Trøndelag | 16.06.2021 | 16,8 | 13JAN23DM1 | 8  | 7113  | 358   | 5   | 3 | 1 | 1 | 1 |

**Table S4: GenBank accession numbers.**

| <b>Name</b>                                  | <b>Genbank Accession</b> |
|----------------------------------------------|--------------------------|
| Acanthamoeba polyphaga mimivirus             | YP_003986929             |
| Acanthamoeba turfacea chlorella virus 1      | ABT16414                 |
| Acanthamoeba turfacea chlorella virus MN0810 | AGE55620                 |
| Cafeteria roenbergensis virus                | ADO67376                 |
| Chrysochromulina ericina virus CeV-01B       | ABU23712                 |
| Ecklonia maxima DH-ZA-D1735                  | MG967362                 |
| Ecklonia maxima PN-ZA-D1764                  | MG967368                 |
| Ecklonia maxima PN-ZA-D1765                  | MG967369                 |
| Ecklonia maxima PN-ZA-D1766                  | MG967370                 |
| Ecklonia radiata EradKM-ZA-D1760             | MG967367                 |
| Ecklonia radiata EradKM-ZA-D1763             | MG967366                 |
| Ectocarpus fasciculatus Efas1                | HG003334                 |
| Ectocarpus fasciculatus Efas2                | HG003335                 |
| Ectocarpus siliculosus EsV1                  | AAK14534                 |
| Feldmannia irregularis FirrV-1               | AAR26925                 |
| Feldmannia simplex Flex1                     | HG003340                 |
| Feldmannia simplex Flex2                     | HG003341                 |
| Feldmannia simplex Flex3                     | HG003342                 |
| Feldmannia simplex Flex8                     | HG003337                 |
| Feldmannia species virus 158                 | YP_002154681             |
| Fowlpox virus                                | AAZ14082                 |
| Heterosigma akashiwo virus 01                | AOM63514                 |
| LhypPH10-3 isolate                           | KP296733                 |
| Macrocystis pyrifera MpyrPN-CL-3             | MG967376                 |
| Megavirus chilensis                          | YP_004894515             |
| Megavirus courdo11                           | AFX92519                 |
| Micromonas pusilla virus SP1                 | AET84889                 |
| Moumouvirus goulette                         | AGF85360                 |
| Myriotrichia clavaeformis 2                  | HG003343                 |
| Organic lake phycodnavirus 1                 | ADX05938                 |
| Organic lake phycodnavirus 2                 | ADX06358                 |
| Ostreococcus tauri virus 1                   | YP_003212988             |
| Ostreococcus tauri virus 2                   | YP_004063587             |
| Ostreococcus tauri virus 5                   | YP_001648266             |
| Paramecium bursaria Chlorella virus 1        | AAA88828                 |
| Paramecium bursaria Chlorella virus AR158    | ABU44077                 |
| Paramecium bursaria Chlorella virus CVK2     | BAA35143                 |
| Paramecium bursaria Chlorella virus NY2A     | ABT14984                 |
| Phaeocystis globosa virus PgV                | AET73005                 |
| Phaeocystis pouchetii PpV-01                 | ABU23715                 |

|                                  |              |
|----------------------------------|--------------|
| Pylaiella littoralis 1           | HG003336     |
| Pyramimonas orientalis PoV-01B   | ABU23714     |
| SlatPH10-7 isolate               | KP296731     |
| SlatPH10-7.2 isolate             | KP296734     |
| Undaria pinnatifida IC-SK-1      | MG967371     |
| Undaria pinnatifida IC-SK-2      | MG967372     |
| Undaria pinnatifida IC-SK-3      | MG967373     |
| Undaria pinnatifida IC-SK-4      | MG967374     |
| Undaria pinnatifida IC-SK-5      | MG967375     |
| Yellowstone lake phycodnavirus 1 | YP_009174754 |
| Yellowstone lake phycodnavirus 2 | YP_009174565 |
| Yellowstone lake phycodnavirus 3 | YP_009174294 |

Table S5: Number of viral positive (+) and negative (-) samples for each kelp species and year, and in total.

|           | <i>S. latissima</i> | +   | -  | <i>L. hyperborea</i> | +   | - |
|-----------|---------------------|-----|----|----------------------|-----|---|
| 2021-2022 | 372                 | 350 | 21 | 270                  | 263 | 7 |
| 2016-2018 | 157                 | 96  | 61 |                      |     |   |
| TOTAL     | 529                 | 446 | 82 | 270                  | 263 | 7 |

Table S6: Number of infected, non-infected and total number of samples of *S. latissima* from the different areas (defined in Table 1) from 2016-2018.

|                    | South | North | Fjords |
|--------------------|-------|-------|--------|
| Infected           | 57    | 15    | 46     |
| Non infected       | 22    | 27    | 20     |
| Total num. samples | 79    | 42    | 66     |
